# Supplementary material for: A highly efficient access to enantiopure tetrahydropyridines: dual-organocatalyst-promoted asymmetric cascade reaction
Source: Royal Society of Chemistry journal article supplement (doi:10.1039/c3cc40690c), 2013-01-01

**Electronic Supplementary Information for *Chemical Communications***

**A Highly Efficient Access to Enantiopure Tetrahydropyridines:  
Dual-organocatalyst-promoted Asymmetric Cascade Reaction**

**Hua Lin, Yu Tan, Wen-Jie Liu, Zhi-Cheng Zhang, Xing-Wen Sun\* and Guo-Qiang Lin\***

*Department of Chemistry, Fudan University, 220 Handan Road, Shanghai, 200433, P.R.China*

Email: [sunxingwen@fudan.edu.cn](mailto:sunxingwen@fudan.edu.cn); [lingq@sioc.ac.cn](mailto:lingq@sioc.ac.cn)

**Contents**

- I. General experimental methods. (P2)**
- II. General procedure for the synthesis of tetrahydropyridine derivatives 5a-5l. (P2)**
- III. General procedure for the synthesis of tetrahydropyridine derivatives 5m-5o. (P2~P3)**
- IV. Characterization data and copies of HPLC spectra of tetrahydropyridine derivatives 5a-5o. (P3~P17)**
- V. Procedure for the synthesis of pyridine derivatives 10. (P18)**
- VI. Characterization data of compound 10. (P18)**
- VII. X-ray crystal structure of compound 5j. (P19)**
- VIII. X-ray crystal structure of compound 10. (P20)**
- IX. Copies of NMR spectra. (P21~P52)**

### General experimental methods:

NMR spectra were all recorded on a ECA (400 MHz) spectrometer. Chemical shifts are reported in  $\delta$  ppm referenced to an internal SiMe<sub>4</sub> standard for <sup>1</sup>H NMR and chloroform-*d* ( $\delta$  77.0) for <sup>13</sup>C NMR. Optical rotations were measured in CHCl<sub>3</sub> on a Rudolph research analytical, Auto pol ® LV, automatic polarimeter. HPLC was performed on an Agilent 1100 series instrument or a Jasco uv-2075 plus intelligent uv/ivs detector by using Daicel Chiracel AS-H column or Phenomenex Lux 5u Amylose-2 column. Flash column chromatography was performed using silica gel (300–400 mesh). Analytical thin-layer chromatography was performed using glass plates pre-coated with 0.25 mm 300–400 mesh silica gel impregnated with a fluorescent indicator (254 nm). Thin layer chromatography plates were visualized by exposure to ultraviolet light. Commercial reagents and solvents were used as received. Dichloromethane was fractionally distilled.

General procedure for the synthesis of tetrahydropyridine derivatives **5a-5l**:

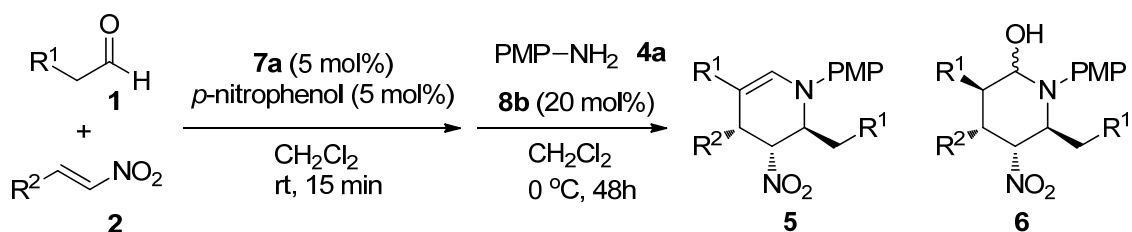

A solution of nitroalkene **2** (0.25 mmol), *p*-nitrophenol (5 mol%) and catalyst **7a** (5 mol%) in CH<sub>2</sub>Cl<sub>2</sub> (0.25 mL) was added with aldehyde **1** (1.25 mmol). The resulting mixture was stirred at room temperature until all the nitroalkene was consumed, then cooled to 0 °C, added with catalyst **8b** (20 mol%), PMPNH<sub>2</sub> (1.25 mmol) and 4 Å MS (100 mg). The mixture was kept at 0 °C for 48 hours before diluted with CH<sub>2</sub>Cl<sub>2</sub>, filtered through a short pad of celite. The filtrate was concentrated and purified on silica gel to afford the desired product.

General procedure for the synthesis of tetrahydropyridine derivatives **5m-5o**:

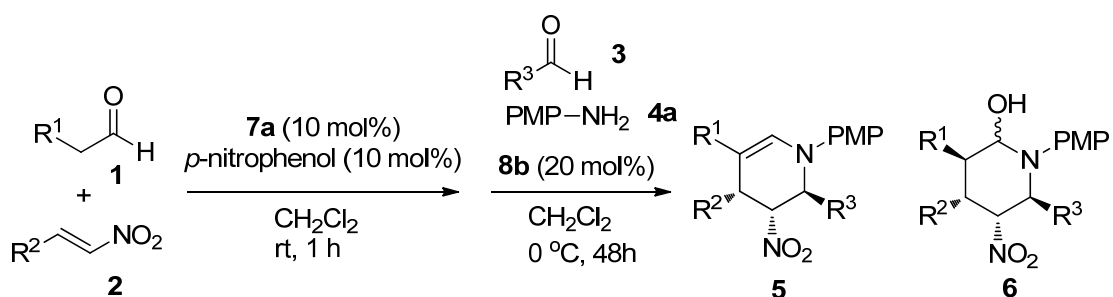

A solution of nitroalkene **2** (0.25 mmol), *p*-nitrophenol (10 mol%) and catalyst **7a** (10 mol%) in CH<sub>2</sub>Cl<sub>2</sub> (0.25 mL) was added with aldehyde **1** (0.3 mmol). The resulting mixture was stirred at room temperature until all the nitroalkene was consumed, then cooled to 0 °C, added with aldehyde **3** (1 mmol), catalyst **8b** (20 mol%), PMPNH<sub>2</sub> (1 mmol) and 4 Å MS

(100 mg). The mixture was kept at 0 °C for 48 hours before diluted with CH<sub>2</sub>Cl<sub>2</sub>, filtered through a short pad of celite. The filtrate was concentrated and purified on silica gel to afford the desired product.

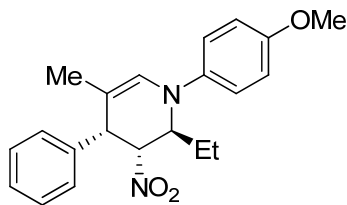

**(2*S*,3*R*,4*R*)-2-ethyl-1-(4-methoxyphenyl)-5-methyl-3-nitro-4-phenyl-1,2,3,4-tetrahydropyridine (5a)**

Purified by FC (PE:EtOAc = 30:1). Orange solid. The ee was determined by chiral HPLC using a Phenomenex Lux 5u Amylose-2 column (hexane/*i*-PrOH = 90/10); flow rate 1 mL/min;  $\lambda$  = 230 nm;  $\tau_{\text{major}}$  = 12.0 min,  $\tau_{\text{minor}}$  = 11.0 min, 99% ee.

$[\alpha]_{\text{D}}^{15} = +381.7$  ( $c = 1.0$ , CH<sub>3</sub>Cl).

**<sup>1</sup>H-NMR (CDCl<sub>3</sub>, 400 MHz):**  $\delta$  7.21-7.31 (m, 5H), 6.98 (d,  $J=8.4$  Hz, 2H), 6.86 (d,  $J=8.8$  Hz, 2H), 6.35 (s, 1H), 5.09 (t,  $J=4.8$  Hz, 1H), 4.04-4.09 (m, 1H), 3.77 (s, 3H), 3.76 (d,  $J=6.4$  Hz, 1H), 1.71-1.76 (m, 2H), 1.63 (s, 3H), 1.07 (t,  $J=7.6$  Hz, 3H) **<sup>13</sup>C-NMR (CDCl<sub>3</sub>, 100 MHz):**  $\delta$  154.7, 140.5, 136.3, 129.3, 128.5, 128.2, 127.7, 119.9, 114.5, 105.6, 87.0, 57.9, 55.6, 44.3, 24.3, 18.6, 9.7

HRMS (APCI)  $m/z$  calcd for C<sub>21</sub>H<sub>25</sub>N<sub>2</sub>O<sub>3</sub> [M+H]<sup>+</sup> 353.1865, found: 353.1864

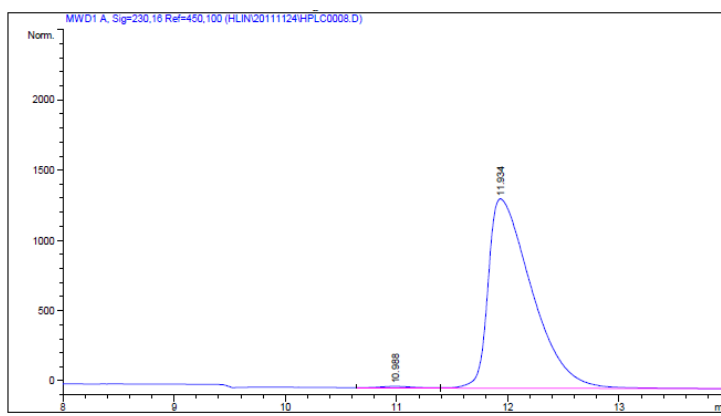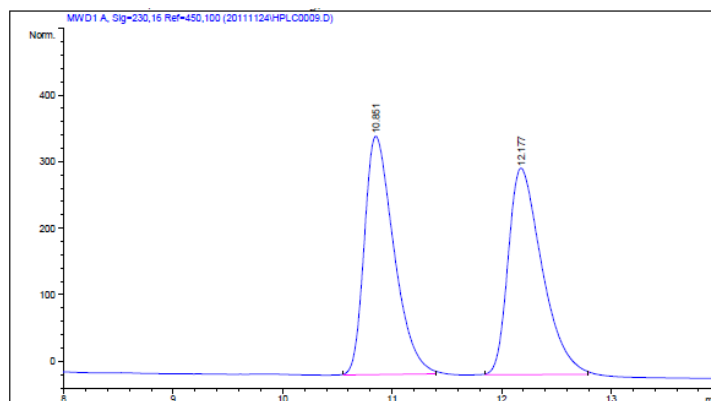

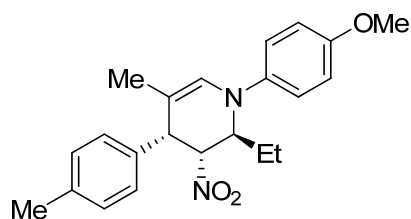

**(2S,3R,4R)-2-ethyl-1-(4-methoxyphenyl)-5-methyl-3-nitro-4-(p-tolyl)-1,2,3,4-tetrahydropyridine (5b)**

Purified by FC (PE:EtOAc = 30:1). Orange solid. The ee was determined by chiral HPLC using a Phenomenex Lux 5u Amylose-2 column (hexane/*i*-PrOH = 90/10); flow rate 1 mL/min;  $\lambda$  = 230 nm;  $\tau_{\text{major}}$  = 10.8 min,  $\tau_{\text{minor}}$  = 10.1 min,

97% ee.  $[\alpha]_{\text{D}}^{15} = +338.7$  (c = 1.0, CH<sub>3</sub>Cl).

**<sup>1</sup>H-NMR (CDCl<sub>3</sub>, 400 MHz):**  $\delta$  7.10-7.12 (m, 4H), 6.99 (d,  $J=8.8$  Hz, 2H), 6.87 (d,  $J=8.8$  Hz, 2H), 6.35 (s, 1H), 5.09 (t,  $J=4.8$  Hz, 1H), 4.06-4.10 (m, 1H), 3.78 (s, 3H), 3.76 (d,  $J=6.4$  Hz, 1H), 2.32 (s, 3H), 1.67-1.78 (m, 2H), 1.63 (s, 3H), 1.07 (t,  $J=7.6$  Hz, 3H) **<sup>13</sup>C-NMR (CDCl<sub>3</sub>, 100 MHz):**  $\delta$  154.7, 140.5, 137.3, 133.1, 129.2, 129.2, 128.0, 119.9, 114.5, 105.8, 87.0, 57.8, 55.5, 44.0, 24.3, 21.1, 18.6, 9.7

HRMS (APCI)  $m/z$  calcd for C<sub>22</sub>H<sub>27</sub>N<sub>2</sub>O<sub>3</sub> [M+H]<sup>+</sup> 367.2022, found: 367.2023

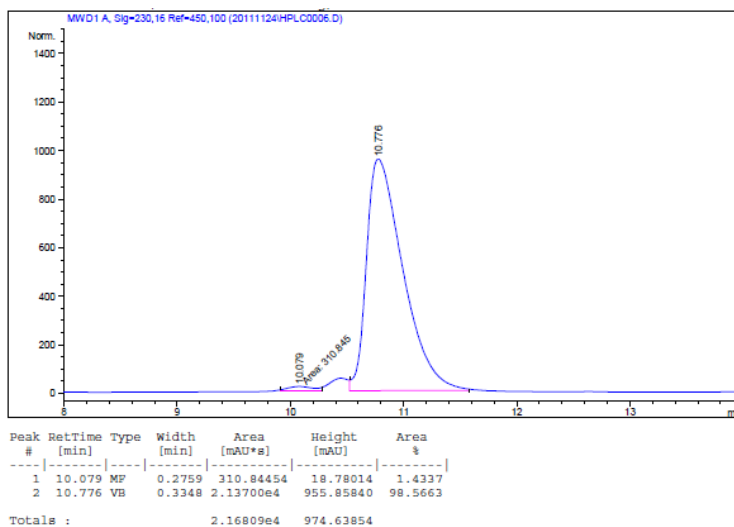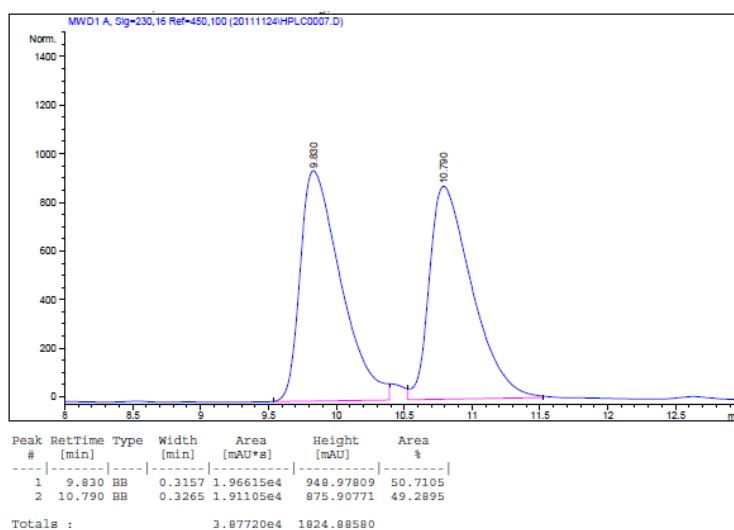

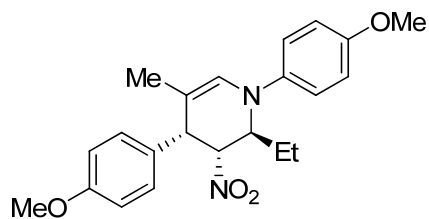

**(2S,3R,4R)-2-ethyl-1,4-bis(4-methoxyphenyl)-5-methyl-3-nitro-1,2,3,4-tetrahydropyridine (5c)**

Purified by FC (PE:EtOAc = 30:1). Orange solid. The ee was determined by chiral HPLC using a Phenomenex Lux 5u Amylose-2 column (hexane/*i*-PrOH = 90/10); flow rate 1 mL/min;  $\lambda = 230$  nm;  $\tau_{\text{major}} = 25.4$  min,  $\tau_{\text{minor}} =$

23.9 min, >99% ee.  $[\alpha]_{\text{D}}^{15} = +275.2$  ( $c = 1.0$ ,  $\text{CH}_3\text{Cl}$ ).

**$^1\text{H-NMR}$  ( $\text{CDCl}_3$ , 400 MHz):**  $\delta$  7.15 (d,  $J=8.0$  Hz, 2H), 6.98 (d,  $J=8.4$  Hz, 2H), 6.86 (d,  $J=8.4$  Hz, 4H), 6.33 (s, 1H), 5.07 (t,  $J=4.8$  Hz, 1H), 4.04-4.07 (m, 1H), 3.78 (s, 6H), 3.75 (d,  $J=6.8$  Hz, 1H), 1.69-1.76 (m, 2H), 1.63 (s, 3H), 1.07 (t,  $J=7.6$  Hz, 3H)  **$^{13}\text{C-NMR}$  ( $\text{CDCl}_3$ , 100 MHz):**  $\delta$  159.2, 154.8, 140.6, 130.5, 130.2, 128.2, 120.1, 114.6, 114.0, 106.1, 87.2, 57.9, 55.7, 55.3, 43.7, 29.8, 24.4, 18.7, 9.8

HRMS (APCI)  $m/z$  calcd for  $\text{C}_{22}\text{H}_{27}\text{N}_2\text{O}_4$   $[\text{M}+\text{H}]^+$  383.1971, found: 383.1972

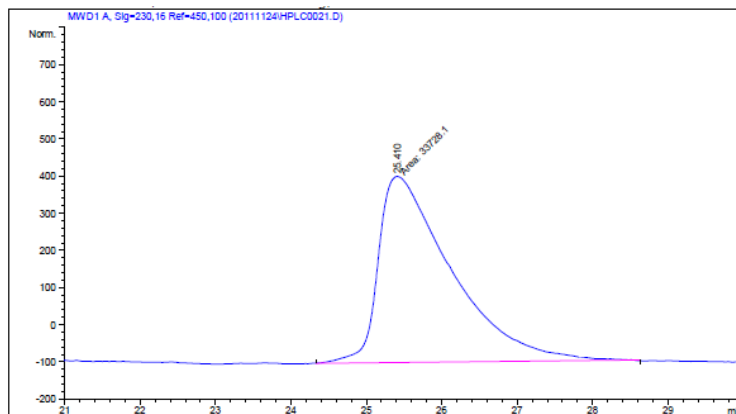

| Peak #   | RetTime [min] | Type | Width [min] | Area [mAU*s] | Height [mAU] | Area %   |
|----------|---------------|------|-------------|--------------|--------------|----------|
| 1        | 25.410        | MM   | 1.1218      | 3.37281e4    | 501.09595    | 100.0000 |
| Totals : |               |      |             | 3.37281e4    | 501.09595    |          |

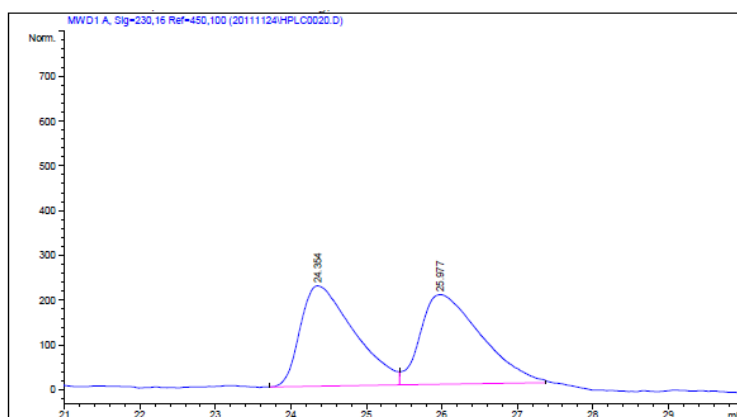

| Peak #   | RetTime [min] | Type | Width [min] | Area [mAU*s] | Height [mAU] | Area %  |
|----------|---------------|------|-------------|--------------|--------------|---------|
| 1        | 24.354        | PV   | 0.7022      | 1.11026e4    | 224.02725    | 49.8601 |
| 2        | 25.977        | VB   | 0.7522      | 1.11649e4    | 200.34044    | 50.1399 |
| Totals : |               |      |             | 2.22676e4    | 424.36769    |         |

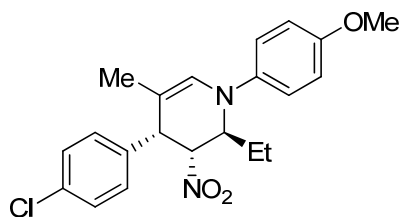

**(2*S*,3*R*,4*R*)-4-(4-chlorophenyl)-2-ethyl-1-(4-methoxyphenyl)-5-methyl-3-nitro-1,2,3,4-tetrahydropyridine (5d)**

Purified by FC (PE:EtOAc = 30:1). Orange solid. The ee was determined by chiral HPLC using a Daicel Chiralcel AS-H column (hexane/*i*-PrOH = 90/10); flow rate 1 mL/min;  $\lambda = 230$  nm;  $\tau_{\text{major}} = 16.8$  min,  $\tau_{\text{minor}} = 8.4$  min, 98% ee.  $[\alpha]_{\text{D}}^{15} = +290.8$  ( $c = 1.0$ ,  $\text{CH}_3\text{Cl}$ ).

**<sup>1</sup>H-NMR (CDCl<sub>3</sub>, 400 MHz):**  $\delta$  7.30 (d,  $J=8.4$  Hz, 2H), 7.17 (d,  $J=8.0$  Hz, 2H), 6.98 (d,  $J=8.8$  Hz, 2H), 6.86 (d,  $J=8.8$  Hz, 2H), 6.35 (s, 1H), 5.07 (t,  $J=4.8$  Hz, 1H), 4.04-4.07 (m, 1H), 3.78 (s, 3H), 3.75 (d,  $J=5.6$  Hz, 1H), 1.69-1.76 (m, 2H), 1.61 (s, 3H), 1.07 (t,  $J=7.6$  Hz, 3H) **<sup>13</sup>C-NMR (CDCl<sub>3</sub>, 100 MHz):**  $\delta$  154.8, 140.3, 134.9, 133.6, 130.7, 128.7, 128.5, 119.9, 114.5, 105.0, 86.8, 57.9, 55.6, 43.7, 24.2, 18.5, 9.7

HRMS (APCI)  $m/z$  calcd for C<sub>21</sub>H<sub>24</sub>ClN<sub>2</sub>O<sub>3</sub> [M+H]<sup>+</sup> 387.1475, found: 387.1482

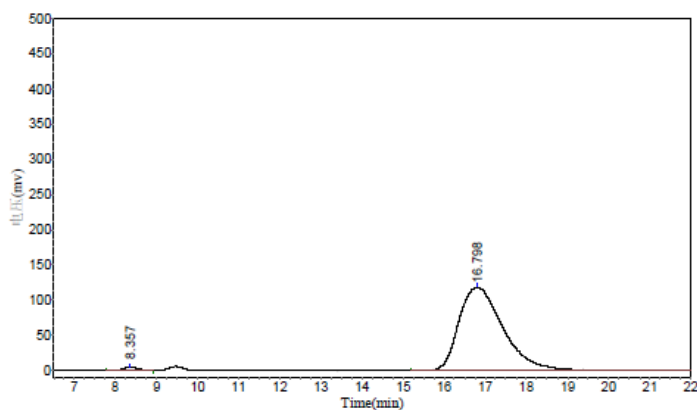

**Results**

| Peak No.     | Peak ID | Ret Time | Height     | Area        | Conc.    |
|--------------|---------|----------|------------|-------------|----------|
| 1            |         | 8.357    | 4054.716   | 104914.844  | 1.1627   |
| 2            |         | 16.798   | 118725.109 | 8918574.000 | 98.8373  |
| <b>Total</b> |         |          | 122779.825 | 9023488.844 | 100.0000 |

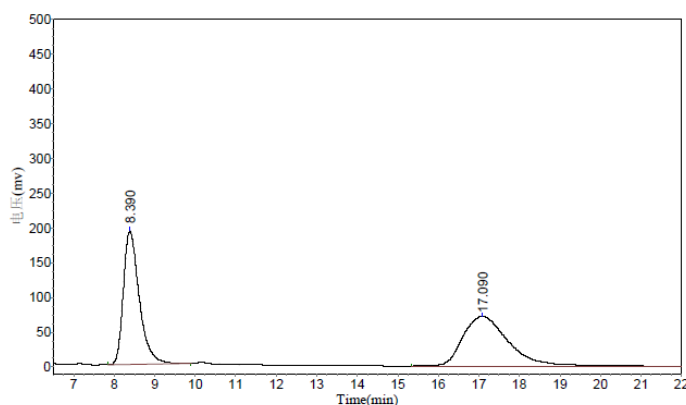

**Results**

| Peak No.     | Peak ID | Ret Time | Height     | Area         | Conc.    |
|--------------|---------|----------|------------|--------------|----------|
| 1            |         | 8.390    | 19454.719  | 5541365.500  | 50.2083  |
| 2            |         | 17.090   | 71155.078  | 5495385.500  | 49.7917  |
| <b>Total</b> |         |          | 265709.797 | 11036751.000 | 100.0000 |

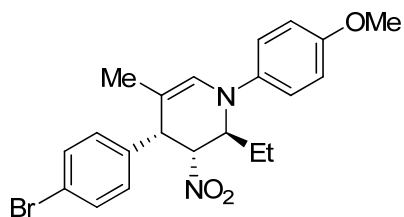

**(2*S*,3*R*,4*R*)-4-(4-bromophenyl)-2-ethyl-1-(4-methoxyphenyl)-5-methyl-3-nitro-1,2,3,4-tetrahydropyridine (5e)**

Purified by FC (PE:EA=30:1). Orange solid. The ee was determined by chiral HPLC using a Daicel Chiralcel AS-H column (hexane/*i*-PrOH = 99/1); flow rate 0.5 mL/min;  $\lambda = 230$  nm;  $\tau_{\text{major}} = 28.7$  min,  $\tau_{\text{minor}} = 26.5$  min, 96% ee.

$[\alpha]_{\text{D}}^{15} = +129.1$  ( $c = 0.5$ ,  $\text{CH}_2\text{Cl}_2$ ).

**$^1\text{H-NMR}$  ( $\text{CDCl}_3$ , 400 MHz):**  $\delta$  7.30 (d,  $J=7.6$  Hz, 2H), 7.17 (d,  $J=7.6$  Hz, 2H), 6.97 (d,  $J=8.0$  Hz, 2H), 6.86 (d,  $J=8.4$  Hz, 2H), 6.35 (s, 1H), 5.07 (t,  $J=4.8$  Hz, 1H), 4.04-4.07 (m, 1H), 3.78 (s, 3H), 3.75 (d,  $J=6.4$  Hz, 1H), 1.65-1.78 (m, 2H), 1.61 (s, 3H), 1.07 (t,  $J=7.6$  Hz, 3H)  **$^{13}\text{C-NMR}$  ( $\text{CDCl}_3$ , 100 MHz):**  $\delta$  154.8, 140.3, 134.9, 133.6, 130.7, 128.7, 128.5, 120.0, 114.5, 105.0, 86.8, 57.8, 55.6, 43.7, 29.7, 24.2, 18.5, 9.7

HRMS (APCI)  $m/z$  calcd for  $\text{C}_{21}\text{H}_{24}\text{BrN}_2\text{O}_3$   $[\text{M}+\text{H}]^+$  431.0970, found: 431.0972

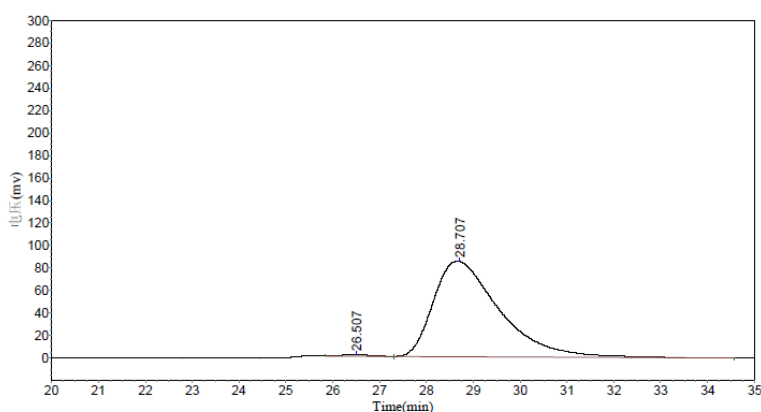

**Results**

| Peak No.     | Peak ID | Ret Time | Height    | Area        | Conc.    |
|--------------|---------|----------|-----------|-------------|----------|
| 1            |         | 26.507   | 2899.361  | 190897.063  | 2.1828   |
| 2            |         | 28.707   | 85969.539 | 8554718.000 | 97.8172  |
| <b>Total</b> |         |          | 88868.900 | 8745615.063 | 100.0000 |

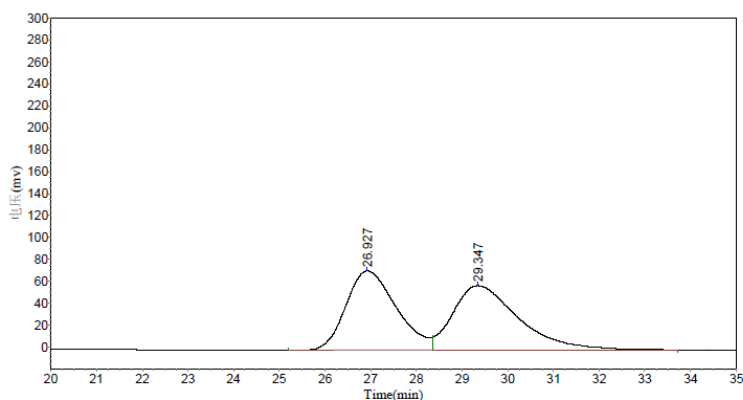

**Results**

| Peak No.     | Peak ID | Ret Time | Height     | Area         | Conc.    |
|--------------|---------|----------|------------|--------------|----------|
| 1            |         | 26.927   | 72188.094  | 5521151.000  | 48.5967  |
| 2            |         | 29.347   | 58765.578  | 5840011.500  | 51.4033  |
| <b>Total</b> |         |          | 130953.672 | 11361162.500 | 100.0000 |

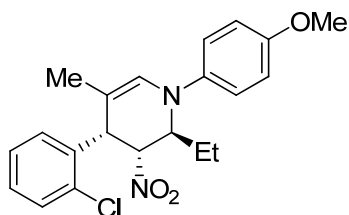

**(2*S*,3*R*,4*R*)-4-(2-chlorophenyl)-2-ethyl-1-(4-methoxyphenyl)-5-methyl-3-nitro-1,2,3,4-tetrahydropyridine (5f)**

Purified by FC (PE:EA=30:1). Orange solid. The ee was determined by chiral HPLC using a Daicel Chiralcel AS-H column (hexane/*i*-PrOH = 90/10); flow rate 1 mL/min;  $\lambda = 230$  nm;  $\tau_{\text{major}} = 16.7$  min,  $\tau_{\text{minor}} = 8.3$  min, 97% ee.

$[\alpha]_{\text{D}}^{15} = +590.7$  ( $c = 1.0$ ,  $\text{CH}_3\text{Cl}$ ).

**$^1\text{H-NMR}$  ( $\text{CDCl}_3$ , 400 MHz):**  $\delta$  7.49 (d,  $J=7.6$  Hz, 1H), 7.18 (d,  $J=8.8$  Hz, 2H), 7.06 (d,  $J=6.8$  Hz, 1H), 6.84 (d,  $J=8.4$  Hz, 2H), 6.76 (d,  $J=8.0$  Hz, 2H), 6.33 (s, 1H), 5.28 (d,  $J=4.8$  Hz, 1H), 4.19 (d,  $J=5.2$  Hz, 1H), 4.02-4.07 (m, 1H), 3.68 (s, 3H), 1.81-1.89 (m, 1H), 1.69-1.76 (m, 1H), 1.58 (s, 3H), 1.13 (t,  $J=7.6$  Hz, 3H)  **$^{13}\text{C-NMR}$  ( $\text{CDCl}_3$ , 100 MHz):**  $\delta$  154.1, 140.7, 134.6, 132.7, 131.6, 129.2, 127.5, 127.3, 125.7, 118.0, 114.5, 106.0, 83.7, 60.4, 55.6, 41.9, 25.3, 18.4, 10.7,

HRMS (APCI)  $m/z$  calcd for  $\text{C}_{21}\text{H}_{24}\text{ClN}_2\text{O}_3$   $[\text{M}+\text{H}]^+$  387.1475, found: 387.1477

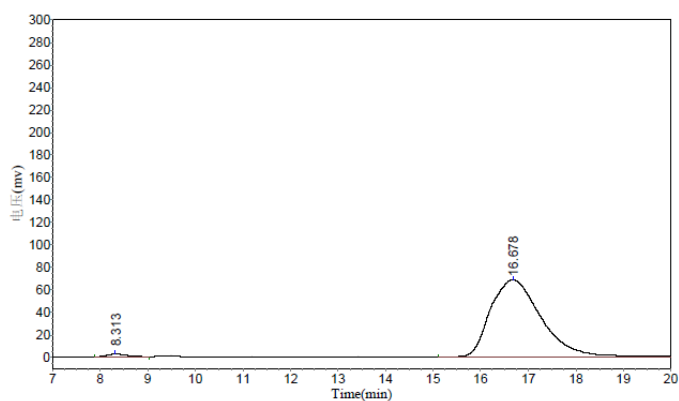

**Results**

| Peak No.     | Peak ID | Ret Time | Height    | Area        | Conc.    |
|--------------|---------|----------|-----------|-------------|----------|
| 1            |         | 8.313    | 2729.280  | 78489.398   | 1.4934   |
| 2            |         | 16.678   | 68672.453 | 5177363.500 | 98.5066  |
| <b>Total</b> |         |          | 71401.733 | 5255852.898 | 100.0000 |

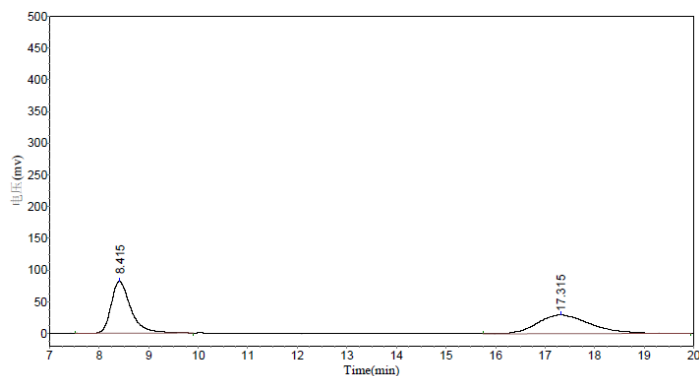

**Results**

| Peak No.     | Peak ID | Ret Time | Height     | Area        | Conc.    |
|--------------|---------|----------|------------|-------------|----------|
| 1            |         | 8.415    | 81662.250  | 2288705.000 | 51.0535  |
| 2            |         | 17.315   | 29417.785  | 2194249.500 | 48.9465  |
| <b>Total</b> |         |          | 111080.035 | 4482954.500 | 100.0000 |



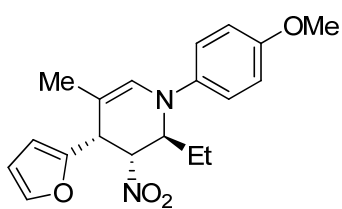

**(2*S*,3*R*,4*R*)-2-ethyl-4-(furan-2-yl)-1-(4-methoxyphenyl)-5-methyl-3-nitro-1,2,3,4-tetrahydropyridine (5g)**

Purified by FC (PE:EtOAc = 30:1). Orange solid. The ee was determined by chiral HPLC using a Phenomenex Lux 5u Amylose-2 column (hexane/*i*-PrOH = 90/10); flow rate 1 mL/min;  $\lambda = 230$  nm;  $\tau_{\text{major}} = 11.7$  min,  $\tau_{\text{minor}} = 10.9$  min, 96% ee.

$[\alpha]_{\text{D}}^{15} = +145.1$  ( $c = 0.5$ , CH<sub>3</sub>Cl).

**<sup>1</sup>H-NMR (CDCl<sub>3</sub>, 400 MHz):**  $\delta$  7.36 (s, 1H), 6.97 (d,  $J=8.8$  Hz, 2H), 6.85 (d,  $J=8.8$  Hz, 2H), 6.34 (s, 1H), 6.24 (d,  $J=10.4$  Hz, 2H), 5.11 (t,  $J=4.8$  Hz, 1H), 4.10-4.14 (m, 1H), 3.95 (d,  $J=5.2$  Hz, 1H), 3.77 (s, 3H), 1.71-1.78 (m, 2H), 1.68 (s, 3H), 1.06 (t,  $J=7.6$  Hz, 3H) **<sup>13</sup>C-NMR (CDCl<sub>3</sub>, 100 MHz):**  $\delta$  155.0, 150.4, 142.2, 140.3, 127.9, 120.5, 114.5, 110.6, 109.4, 103.6, 84.5, 58.3, 55.5, 38.4, 24.2, 18.3, 9.5

HRMS (APCI)  $m/z$  calcd for C<sub>19</sub>H<sub>23</sub>N<sub>2</sub>O<sub>4</sub> [M+H]<sup>+</sup> 343.1658, found: 343.1668

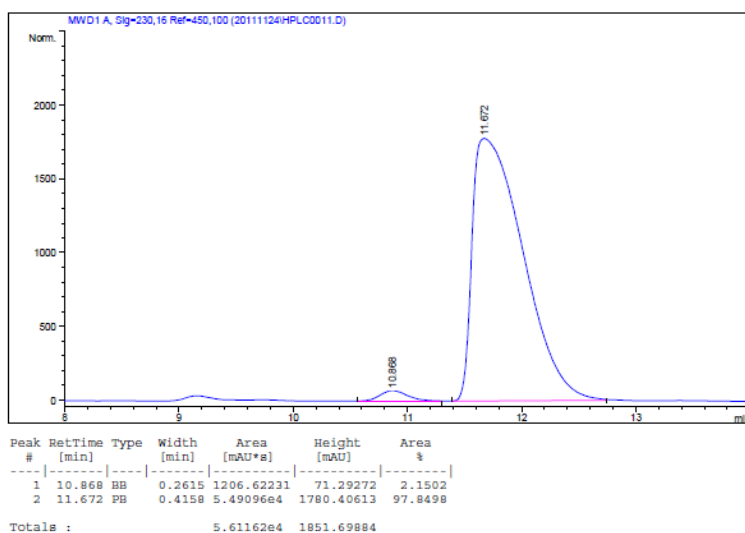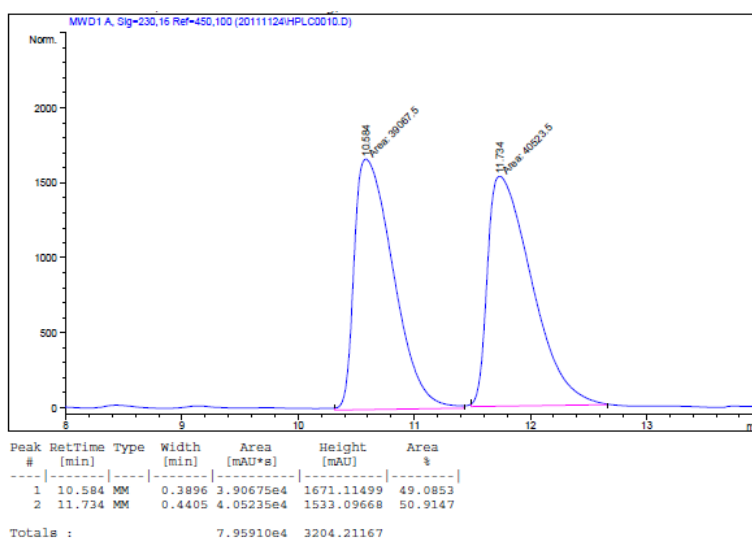

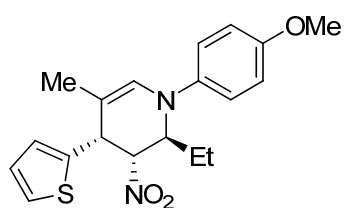

**(2*S*,3*R*,4*R*)-2-ethyl-1-(4-methoxyphenyl)-5-methyl-3-nitro-4-(thiophen-2-yl)-1,2,3,4-tetrahydropyridine (5h)**

Purified by FC (PE:EtOAc = 30:1). Orange solid. The ee was determined by chiral HPLC using a Phenomenex Lux 5u Amylose-2 column (hexane/*i*-PrOH = 90/10); flow rate 1 mL/min;  $\lambda = 230$  nm;  $\tau_{\text{major}} = 11.0$  min,  $\tau_{\text{minor}} = 10.1$  min, 94% ee.

$[\alpha]_{\text{D}}^{15} = +159.3$  ( $c = 1.0$ , CH<sub>3</sub>Cl).

**<sup>1</sup>H-NMR (CDCl<sub>3</sub>, 400 MHz):**  $\delta$  7.24 (d,  $J=8.0$  Hz, 2H), 7.03 (d,  $J=7.6$  Hz, 2H), 6.88-6.96 (m, 2H), 6.86 (d,  $J=8.0$  Hz, 2H), 6.20 (s, 1H), 5.02 (t,  $J=4.8$  Hz, 1H), 4.14 (d,  $J=5.2$  Hz, 1H), 4.11 (d,  $J=4.8$  Hz, 1H), 3.78 (s, 3H), 1.68 (s, 3H), 1.60-1.68 (m, 2H), 0.99 (t,  $J=6.8$  Hz, 3H) **<sup>13</sup>C-NMR (CDCl<sub>3</sub>, 100 MHz):**  $\delta$  155.5, 140.0, 139.9, 129.1, 127.5, 127.0, 125.3, 122.0, 114.5, 105.1, 86.4, 56.3, 55.5, 40.7, 23.2, 18.5, 8.8

HRMS (ESI)  $m/z$  calcd for C<sub>19</sub>H<sub>23</sub>N<sub>2</sub>O<sub>3</sub>S [M+H]<sup>+</sup> 359.1429, found: 359.1416

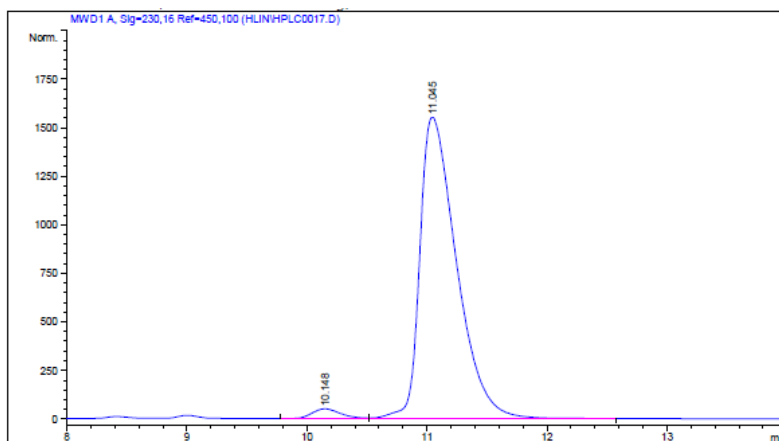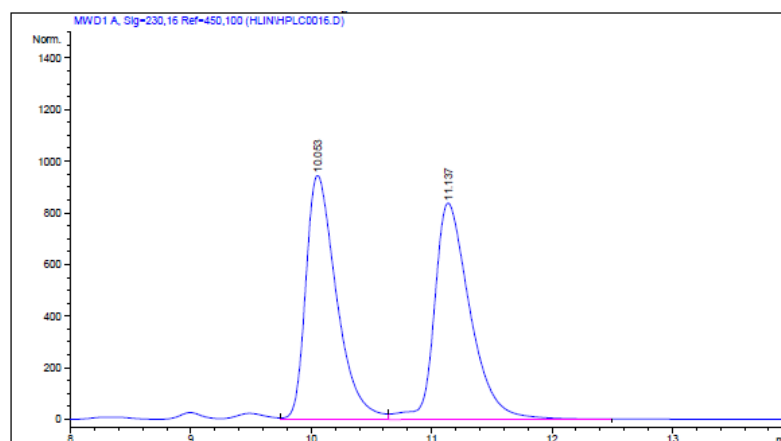

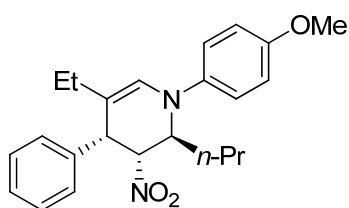

**(2*S*,3*R*,4*R*)-5-ethyl-1-(4-methoxyphenyl)-3-nitro-4-phenyl-2-propyl-1,2,3,4-tetrahydropyridine (5i)**

Purified by FC (PE:EtOAc = 100:1). Orange solid. The ee was determined by chiral HPLC using a Phenomenex Lux 5u Amylose-2 column (hexane/*i*-PrOH = 90/10); flow rate 1 mL/min;  $\lambda = 230$  nm;  $\tau_{\text{major}} = 9.5$  min,  $\tau_{\text{minor}} = 8.9$  min, 96% ee.

$[\alpha]_{\text{D}}^{15} = +345.9$  ( $c = 1.0$ , CH<sub>3</sub>Cl).

**<sup>1</sup>H-NMR (CDCl<sub>3</sub>, 400 MHz):**  $\delta$  7.21-7.31 (m, 5H), 6.97 (d,  $J=8.0$  Hz, 2H), 6.85 (d,  $J=8.4$  Hz, 2H), 6.37 (s, 1H), 5.06 (t,  $J=4.8$  Hz, 1H), 4.11-4.16 (m, 1H), 3.87 (d,  $J=5.2$  Hz, 1H), 3.77 (s, 3H), 1.95-2.07 (m, 2H), 1.60-1.71 (m, 2H), 1.52-1.60 (m, 2H), 0.92-0.98 (m, 6H) **<sup>13</sup>C-NMR (CDCl<sub>3</sub>, 100 MHz):**  $\delta$  154.7, 140.6, 136.4, 129.4, 128.4, 127.7, 126.9, 119.7, 114.5, 111.7, 87.4, 57.0, 55.6, 42.5, 33.6, 25.5, 18.6, 14.1, 13.2

HRMS (APCI)  $m/z$  calcd for C<sub>23</sub>H<sub>29</sub>N<sub>2</sub>O<sub>3</sub> [M+H]<sup>+</sup> 381.2178, found: 381.2185

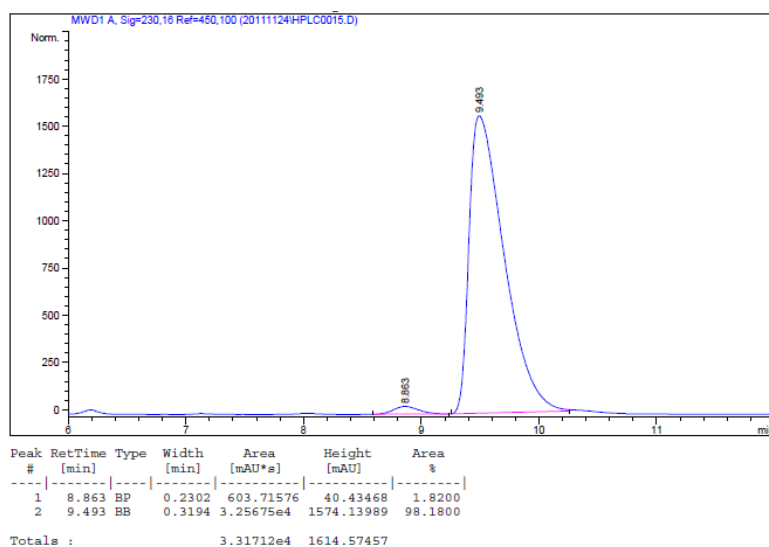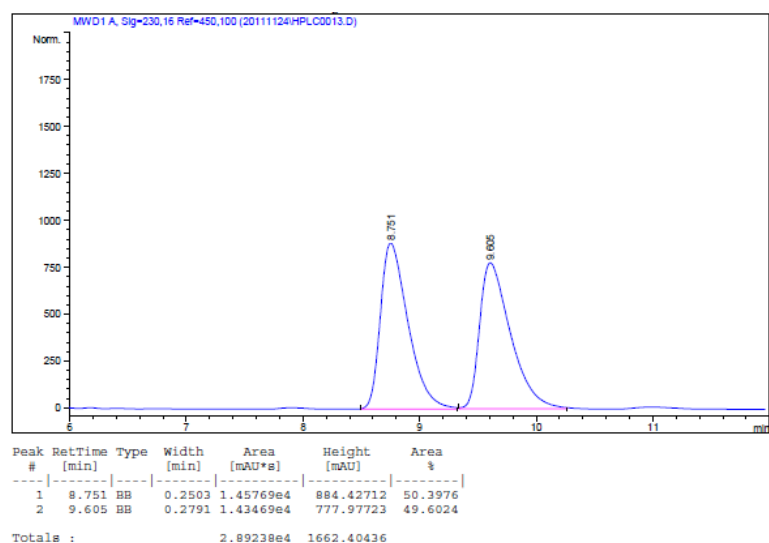

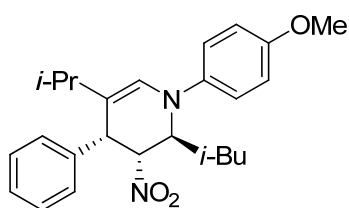

**(2*S*,3*R*,4*R*)-2-isobutyl-5-isopropyl-1-(4-methoxyphenyl)-3-nitro-4-phenyl-1,2,3,4-tetrahydropyridine (5j)**

Purified by FC (PE:EtOAc = 200:1). Orange solid. The ee was determined by chiral HPLC using a Phenomenex Lux 5u Amylose-2 column (hexane/*i*-PrOH = 90/10); flow rate 1 mL/min;  $\lambda = 230$  nm;  $\tau_{\text{major}} = 7.4$  min,  $\tau_{\text{minor}} = 6.4$  min, 96% ee.

$[\alpha]_{\text{D}}^{15} = +415.5$  ( $c = 1.0$ ,  $\text{CH}_2\text{Cl}_2$ ).

**$^1\text{H-NMR}$  ( $\text{CDCl}_3$ , 400 MHz):**  $\delta$  7.21-7.30 (m, 5H), 6.93 (d,  $J=7.6$  Hz, 2H), 6.85 (d,  $J=8.0$  Hz, 2H), 6.38 (s, 1H), 5.00-5.04 (m, 1H), 4.19-4.22 (m, 1H), 3.89 (d,  $J=5.6$  Hz, 1H), 3.76 (s, 3H), 2.23-2.26 (m, 1H), 1.81-1.84 (m, 1H), 1.67-1.73 (m, 1H), 1.56-1.59 (m, 1H), 0.89-1.17 (m, 12H)  **$^{13}\text{C-NMR}$  ( $\text{CDCl}_3$ , 100 MHz):**  $\delta$  154.3, 141.0, 136.6, 129.4, 128.5, 127.6, 124.8, 118.6, 116.6, 114.6, 87.7, 56.4, 55.6, 41.8, 40.9, 28.8, 24.5, 23.3, 22.5, 20.0

HRMS (APCI)  $m/z$  calcd for  $\text{C}_{25}\text{H}_{33}\text{N}_2\text{O}_3$   $[\text{M}+\text{H}]^+$  409.2491, found: 409.2489

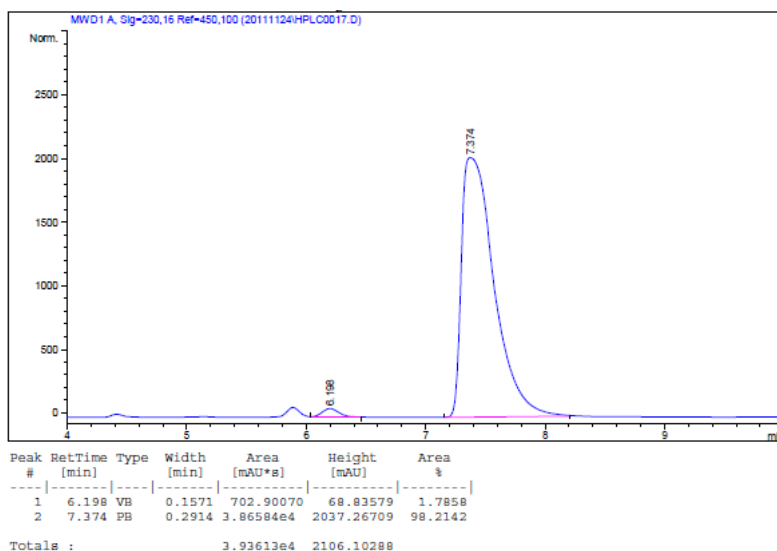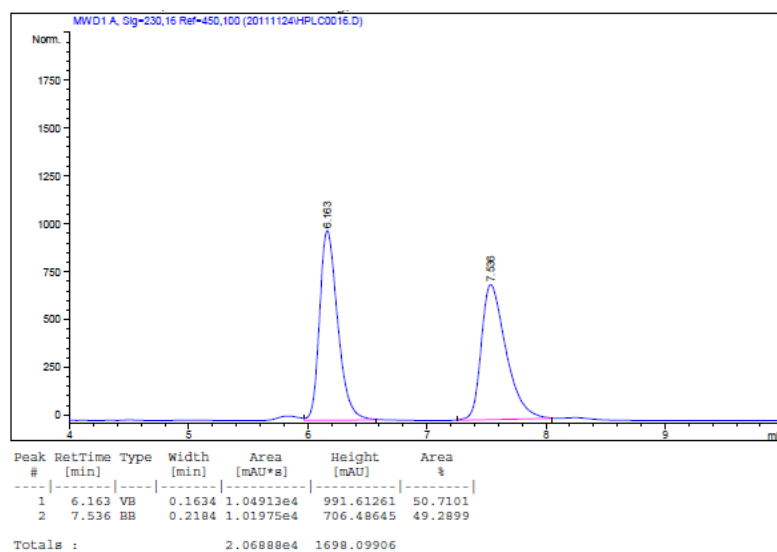

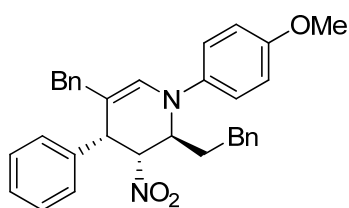

**(2*S*,3*R*,4*R*)-5-benzyl-1-(4-methoxyphenyl)-3-nitro-2-phenethyl-4-phenyl-1,2,3,4-tetrahydropyridine (5k)**

Purified by FC (PE:EtOAc = 20:1). Orange solid. The ee was determined by chiral HPLC using a Phenomenex Lux 5u Amylose-2 column (hexane/*i*-PrOH = 90/10); flow rate 1 mL/min;  $\lambda = 230$  nm;  $\tau_{\text{major}} = 18.4$  min,  $\tau_{\text{minor}} = 15.7$  min, 94% ee.

$[\alpha]_{\text{D}}^{15} = +173.7$  ( $c = 1.0$ ,  $\text{CH}_2\text{Cl}_2$ ).

**$^1\text{H-NMR}$  ( $\text{CDCl}_3$ , 400 MHz):**  $\delta$  7.05-7.28 (m, 13H), 6.82-6.95 (m, 6H), 6.58 (s, 1H), 4.95-5.00 (m, 1H), 4.15-4.22 (m, 1H), 3.75 (s, 3H), 3.47 (d,  $J=5.6$  Hz, 1H), 3.38 (d,  $J=14.4$  Hz, 1H), 3.22 (d,  $J=14.4$  Hz, 1H), 2.76 (t,  $J=7.2$  Hz, 2H), 1.81-1.95 (m, 2H)  **$^{13}\text{C-NMR}$  ( $\text{CDCl}_3$ , 100 MHz):**  $\delta$  154.8, 140.7, 140.2, 140.0, 135.6, 129.6, 128.6, 128.5, 128.4, 128.2, 127.7, 126.3, 126.1, 119.3, 114.6, 110.9, 87.1, 57.3, 55.6, 41.6, 39.1, 33.6, 31.8

HRMS (APCI)  $m/z$  calcd for  $\text{C}_{33}\text{H}_{33}\text{N}_2\text{O}_3$   $[\text{M}+\text{H}]^+$  505.2491, found: 505.2494

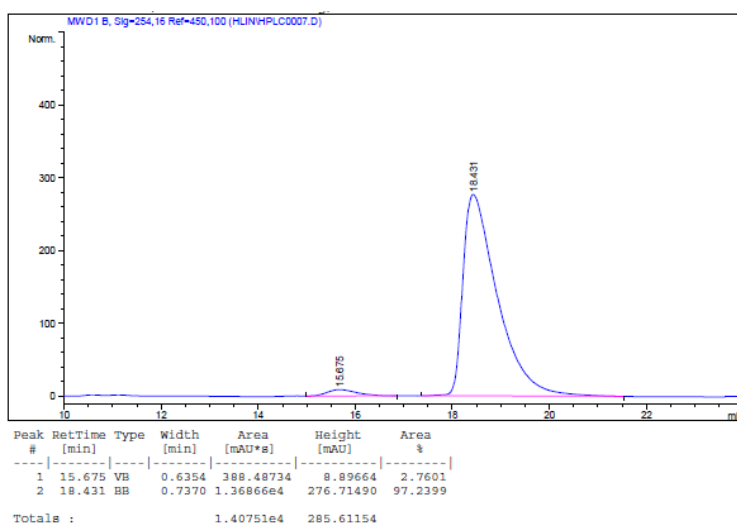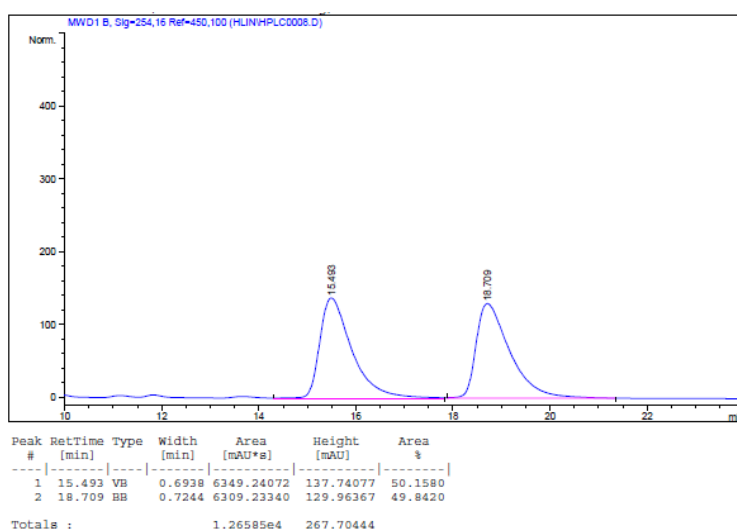

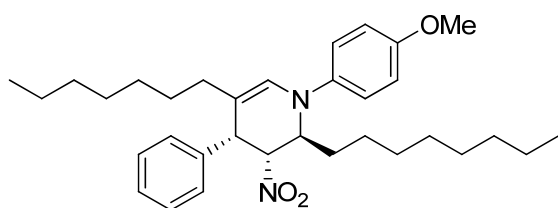

**(2*S*,3*R*,4*R*)-5-heptyl-1-(4-methoxyphenyl)-3-nitro-2-octyl-4-phenyl-1,2,3,4-tetrahydropyridine (5I)**

Purified by FC (PE:EtOAc = 20:1). Orange solid. The ee was determined by chiral HPLC using a Phenomenex Lux 5u Amylose-2 column (hexane/*i*-PrOH = 90/10); flow rate 1

mL/min;  $\lambda = 230$  nm;  $\tau_{\text{major}} = 5.9$  min,  $\tau_{\text{minor}} = 5.5$  min, 96% ee.  $[\alpha]_{\text{D}}^{15} = +263.4$  (c = 1.0, CH<sub>2</sub>Cl).

**<sup>1</sup>H-NMR (CDCl<sub>3</sub>, 400 MHz):**  $\delta$  7.24-7.33 (m, 5H), 6.99 (d,  $J=8.4$  Hz, 2H), 6.88 (d,  $J=8.8$  Hz, 2H), 6.40 (s, 1H), 5.07 (t,  $J=1.2$  Hz, 1H), 4.13-4.19 (m, 1H), 3.86 (d,  $J=5.6$  Hz, 1H), 3.79 (s, 3H), 1.95-2.09 (m, 2H), 1.62-1.82 (m, 2H), 1.45-1.57 (m, 2H), 1.15-1.42 (m, 20H), 0.86-0.94 (m, 6H) **<sup>13</sup>C-NMR (CDCl<sub>3</sub>, 100 MHz):**  $\delta$  154.7, 140.7, 136.5, 129.5, 128.6, 127.8, 127.7, 119.7, 114.7, 110.2, 87.5, 57.4, 55.7, 42.6, 32.5, 31.9, 31.7, 29.7, 29.5, 29.3, 29.2, 28.3, 25.4, 22.7, 14.2

HRMS (APCI)  $m/z$  calcd for C<sub>33</sub>H<sub>49</sub>N<sub>2</sub>O<sub>3</sub> [M+H]<sup>+</sup> 521.3743, found: 521.3737

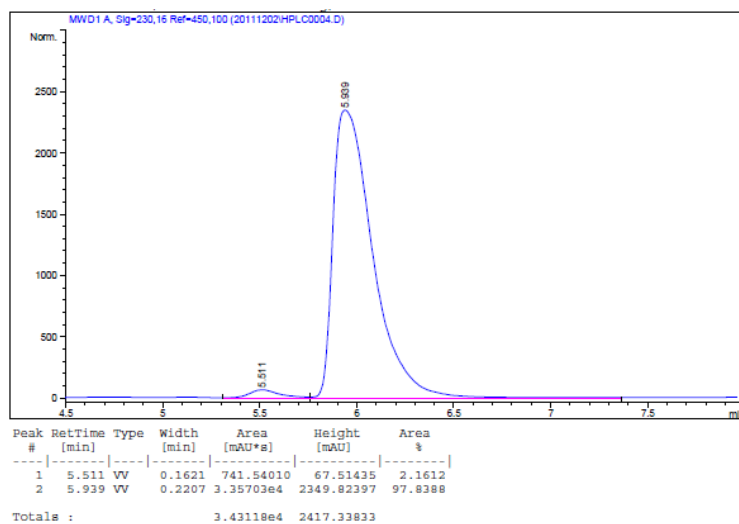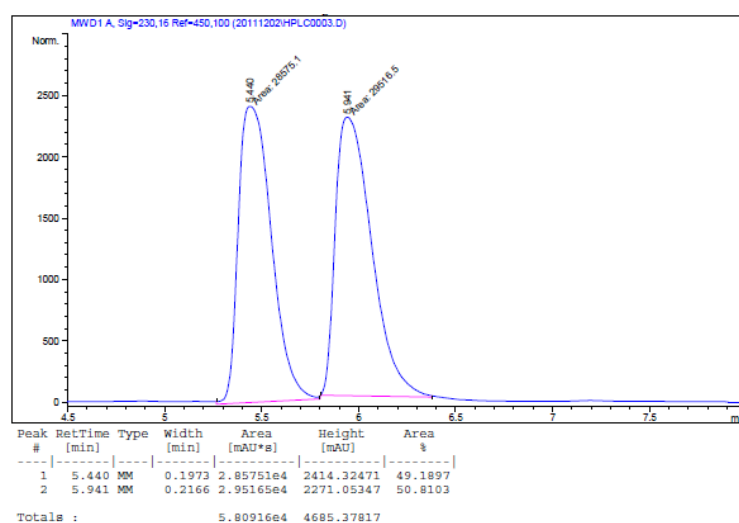

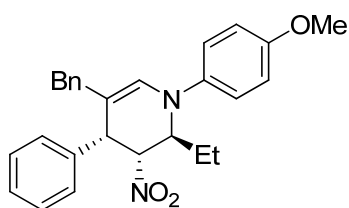

**(2*S*,3*R*,4*R*)-5-benzyl-2-ethyl-1-(4-methoxyphenyl)-3-nitro-4-phenyl-1,2,3,4-tetrahydropyridine (5m)**

Purified by FC (PE:EtOAc = 30:1). Orange solid. The ee was determined by chiral HPLC using a Phenomenex Lux 5u Amylose-2 column (hexane/*i*-PrOH = 90/10); flow rate 1 mL/min;  $\lambda = 230$  nm;  $\tau_{\text{major}} = 13.9$  min,  $\tau_{\text{minor}} = 12.2$  min, 90% ee.

$[\alpha]_{\text{D}}^{15} = +281.8$  ( $c = 1.17$ , CH<sub>3</sub>Cl).

**<sup>1</sup>H-NMR (CDCl<sub>3</sub>, 400 MHz):**  $\delta$  7.16-7.30 (m, 8H), 7.00 (d,  $J=8.0$  Hz, 2H), 6.93 (d,  $J=6.4$  Hz, 2H), 6.87 (d,  $J=8.0$  Hz, 2H), 6.52 (s, 1H), 4.99 (t,  $J=4.8$  Hz, 1H), 4.03-4.09 (m, 1H), 3.78 (s, 3H), 3.54 (d,  $J=5.2$  Hz, 1H), 3.37 (d,  $J=14.4$  Hz, 1H), 3.22 (d,  $J=14.4$  Hz, 1H), 1.56-1.68 (m, 2H), 1.03 (t,  $J=6.8$  Hz, 3H) **<sup>13</sup>C-NMR (CDCl<sub>3</sub>, 100 MHz):**  $\delta$  154.8, 140.3, 140.0, 135.9, 129.6, 128.8, 128.5, 128.2, 127.8, 126.1, 119.8, 114.5, 110.0, 86.9, 58.3, 55.6, 41.8, 39.1, 24.6, 9.8

HRMS (ESI)  $m/z$  calcd for C<sub>27</sub>H<sub>29</sub>N<sub>2</sub>O<sub>3</sub> [M+H]<sup>+</sup> 428.2178, found: 429.2177

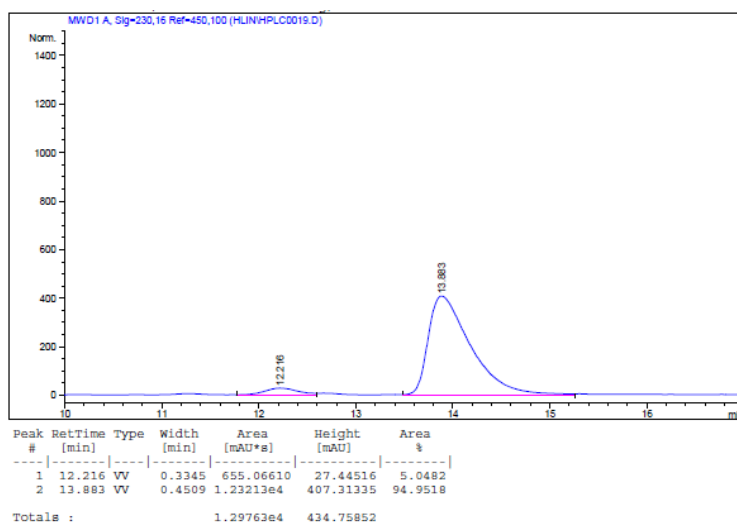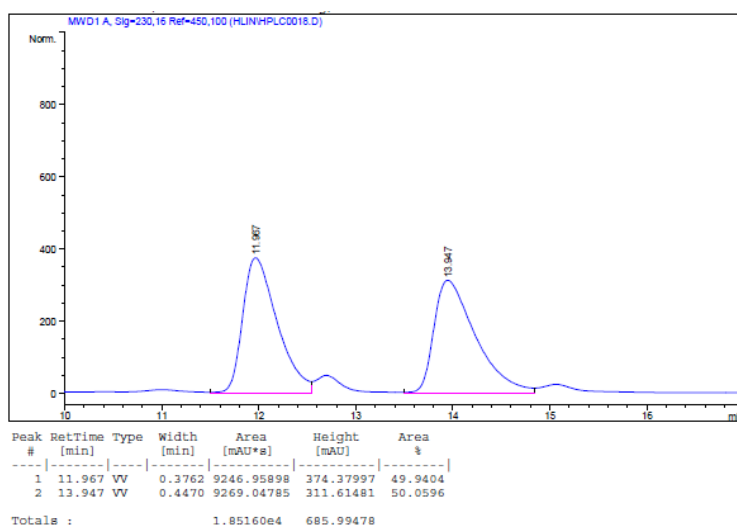

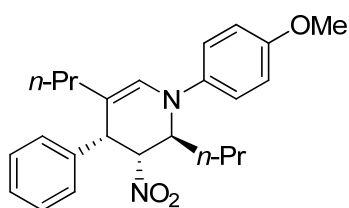

**(2*S*,3*R*,4*R*)-1-(4-methoxyphenyl)-3-nitro-4-phenyl-2,5-dipropyl-1,2,3,4-tetrahydropyridine (5n)**

Purified by FC (PE:EtOAc = 30:1). Orange solid. The ee was determined by chiral HPLC using a Phenomenex Lux 5u Amylose-2 column (hexane/*i*-PrOH = 90/10); flow rate 1 mL/min;  $\lambda = 230$  nm;  $\tau_{\text{major}} = 9.1$  min,  $\tau_{\text{minor}} = 8.3$  min, 94% ee.

$[\alpha]_{\text{D}}^{15} = +375.1$  ( $c = 1.0$ ,  $\text{CH}_3\text{Cl}$ ).

**$^1\text{H-NMR}$  ( $\text{CDCl}_3$ , 400 MHz):**  $\delta$  7.24-7.33 (m, 5H), 6.97 (d,  $J=8.0$  Hz, 2H), 6.85 (d,  $J=8.0$  Hz, 2H), 6.38 (s, 1H), 5.05 (t,  $J=4.8$  Hz, 1H), 4.11-4.19 (m, 1H), 3.83 (d,  $J=6.4$  Hz, 1H), 3.76 (s, 3H), 2.02-2.10 (m, 1H), 1.88-1.95 (m, 1H), 1.60-1.78 (m, 2H), 1.48-1.58 (m, 2H), 1.17-1.41 (m, 2H), 0.98 (t,  $J=6.4$  Hz, 3H), 0.82 (t,  $J=6.4$  Hz, 3H)  **$^{13}\text{C-NMR}$  ( $\text{CDCl}_3$ , 100 MHz):**  $\delta$  154.5, 140.5, 136.3, 129.4, 128.4, 127.6, 127.6, 119.5, 114.5, 109.7, 87.3, 57.1, 55.5, 42.3, 34.5, 33.8, 21.3, 18.7, 14.1, 13.6

HRMS (ESI)  $m/z$  calcd for  $\text{C}_{24}\text{H}_{31}\text{N}_2\text{O}_3$   $[\text{M}+\text{H}]^+$  395.2335, found: 395.2320

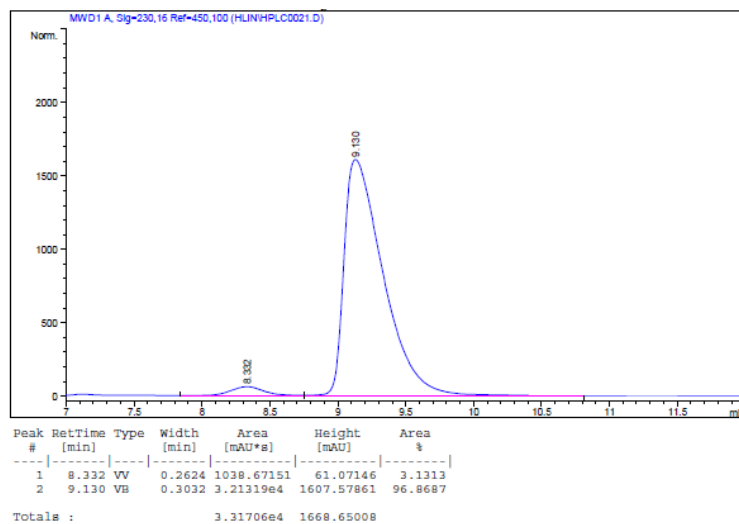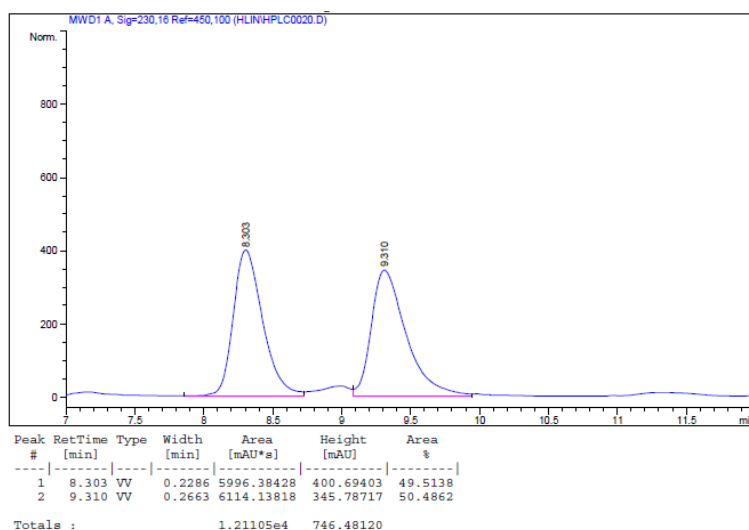



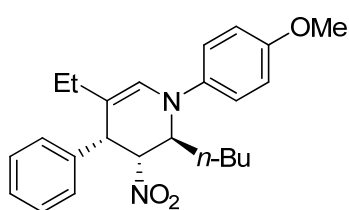

**(2S,3R,4R)-2-butyl-5-ethyl-1-(4-methoxyphenyl)-3-nitro-4-phenyl-1,2,3,4-tetrahydropyridine (5o)**

Purified by FC (PE:EtOAc = 50:1). Orange solid. The ee was determined by chiral HPLC using a Phenomenex Lux 5u Amylose-2 column (hexane/*i*-PrOH = 90/10); flow rate 1 mL/min;  $\lambda = 230$  nm;  $\tau_{\text{major}} = 8.3$  min,  $\tau_{\text{minor}} = 7.7$  min, 93% ee.

$[\alpha]_{\text{D}}^{15} = +318.3$  ( $c = 1.0$ ,  $\text{CH}_3\text{Cl}$ ).

**$^1\text{H-NMR}$  ( $\text{CDCl}_3$ , 400 MHz):**  $\delta$  7.22-7.30 (m, 5H), 6.97 (d,  $J=7.6$  Hz, 2H), 6.86 (d,  $J=7.6$  Hz, 2H), 6.37 (s, 1H), 5.08 (t,  $J=4.8$  Hz, 1H), 4.11-4.17 (m, 1H), 3.87 (d,  $J=4.8$  Hz, 1H), 3.77 (s, 3H), 1.91-2.10 (m, 2H), 1.56-1.77 (m, 2H), 1.28-1.51 (m, 4H), 0.89-0.96 (m, 6H)  **$^{13}\text{C-NMR}$  ( $\text{CDCl}_3$ , 100 MHz):**  $\delta$  154.6, 140.5, 136.4, 129.3, 128.4, 127.7, 126.9, 119.7, 114.5, 111.7, 87.3, 57.0, 55.5, 42.5, 31.0, 27.3, 25.5, 22.7, 13.9, 13.2

HRMS (ESI)  $m/z$  calcd for  $\text{C}_{24}\text{H}_{31}\text{N}_2\text{O}_3$   $[\text{M}+\text{H}]^+$  395.2335, found: 395.2331

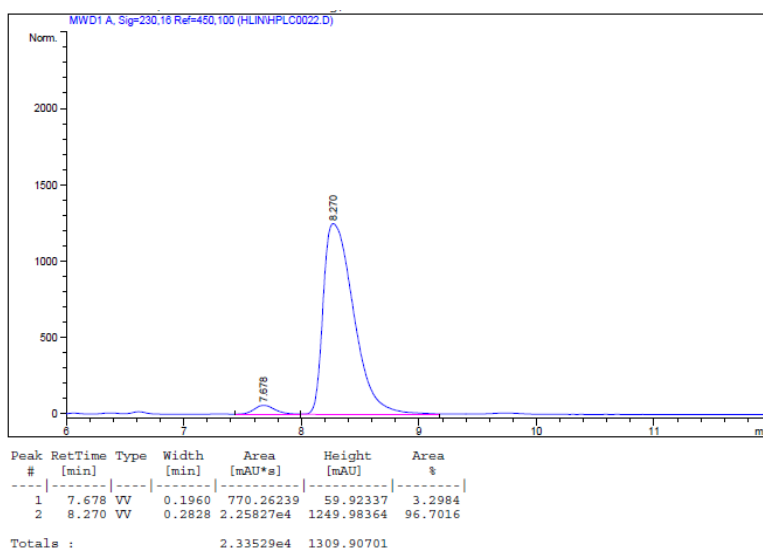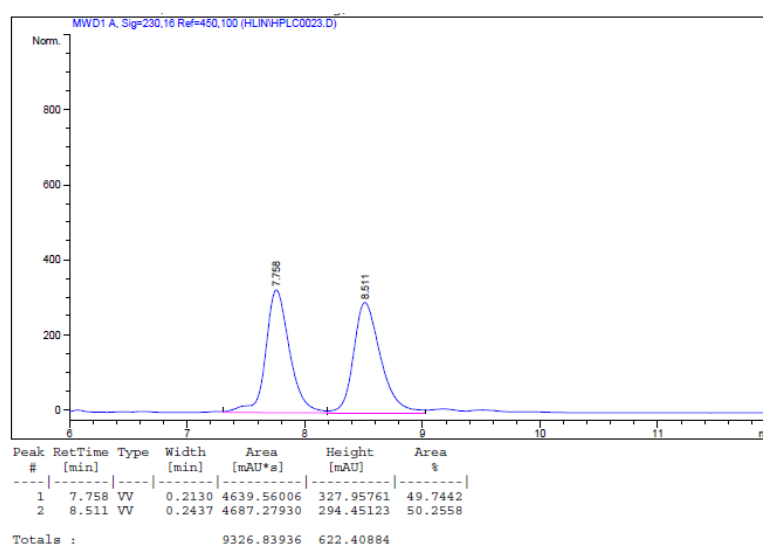

**Procedure for the synthesis of pyridine derivatives 10:**

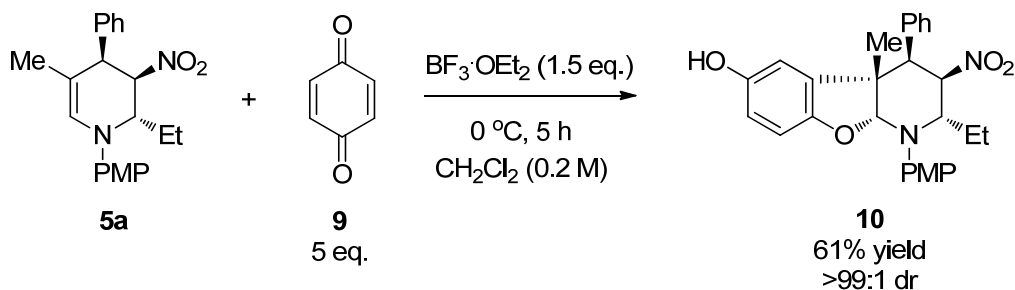

A solution of **5a** (0.1 mmol) in  $\text{CH}_2\text{Cl}_2$  (0.5 mL) was cooled to  $0^\circ\text{C}$ , then added with benzoquinone (0.5 mmol) and  $\text{BF}_3 \cdot \text{OEt}_2$  (0.15 mmol). The result mixture was stirred at  $0^\circ\text{C}$  for 5 hours before quenched with  $\text{NaHCO}_3$  (sat. aq.), extracted with  $\text{CH}_2\text{Cl}_2$ , dried over  $\text{Na}_2\text{SO}_4$ , filtered and concentrated, purified on silica gel to afford the desired product.

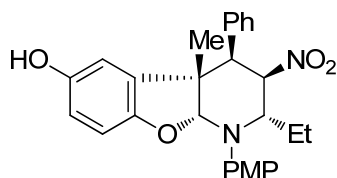

**(2S,3R,4R,4aS,9aR)-2-ethyl-1-(4-methoxyphenyl)-4a-methyl-3-nitro-4-phenyl-1,2,3,4,4a,9a-hexahydrobenzofuro[2,3-b]pyridin-6-ol (10)**

Purified by FC (PE:EtOAc = 8:1). Orange solid.  $[\alpha]_{\text{D}}^{25} = -247.98$  ( $c = 1.0$ ,  $\text{CH}_3\text{Cl}$ ).

**$^1\text{H-NMR}$  ( $\text{CDCl}_3$ , 400 MHz):**  $\delta$  7.31-7.33 (m, 7H), 6.95 (d,  $J=9.2$  Hz, 2H), 6.82 (d,  $J=2.4$  Hz, 1H), 6.89-6.75 (m, 2H), 4.77 (s, 1H), 4.61-4.65 (m, 1H), 4.50-4.55 (m, 1H), 3.84 (s, 3H), 3.78 (d,  $J=8.8$  Hz, 1H), 1.41-1.55 (m, 1H), 1.26 (s, 3H), 0.56 (t,  $J=7.8$  Hz, 3H)  **$^{13}\text{C-NMR}$  ( $\text{CDCl}_3$ , 100 MHz):**  $\delta$  155.1, 151.4, 150.1, 140.5, 134.3, 130.6, 128.8, 128.3, 121.0, 116.4, 114.8, 110.1, 109.7, 100.7, 87.8, 55.6, 54.8, 53.0, 49.1, 29.7, 27.7, 25.7, 9.4

**HRMS (EI)  $m/z$**  calcd for  $\text{C}_{27}\text{H}_{28}\text{N}_2\text{O}_5$   $[\text{M}]^+$  460.1998, found: 460.2000.

### X-ray crystal structure of compound 5j

The absolute configurations of all synthetic tetrahydropyridines **5a-o** were assigned based on the known stereochemistry of Michael addition in the first step together with the determination of relative configuration of the tetrahydropyridine product **5j** through X-ray crystallography.

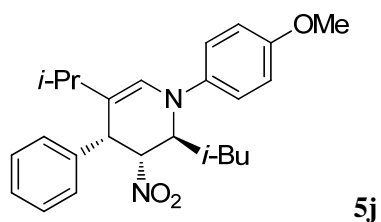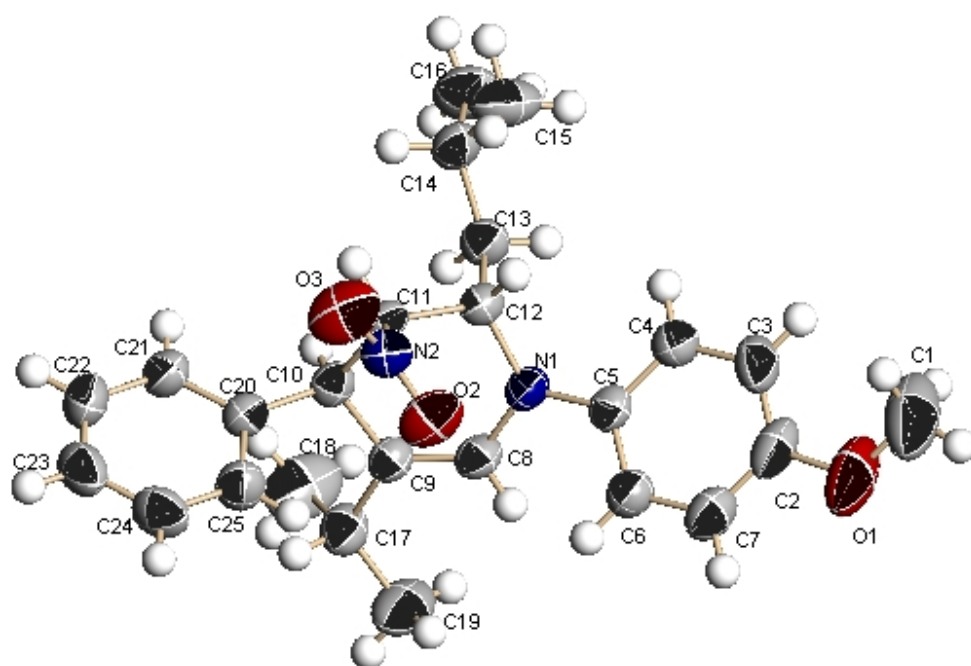

### X-ray crystal structure of compound **10**

The absolute configurations of two new formed stereocenters in compound **10** were determined based on its crystal structure.

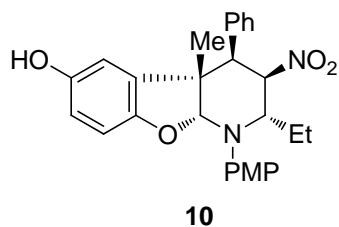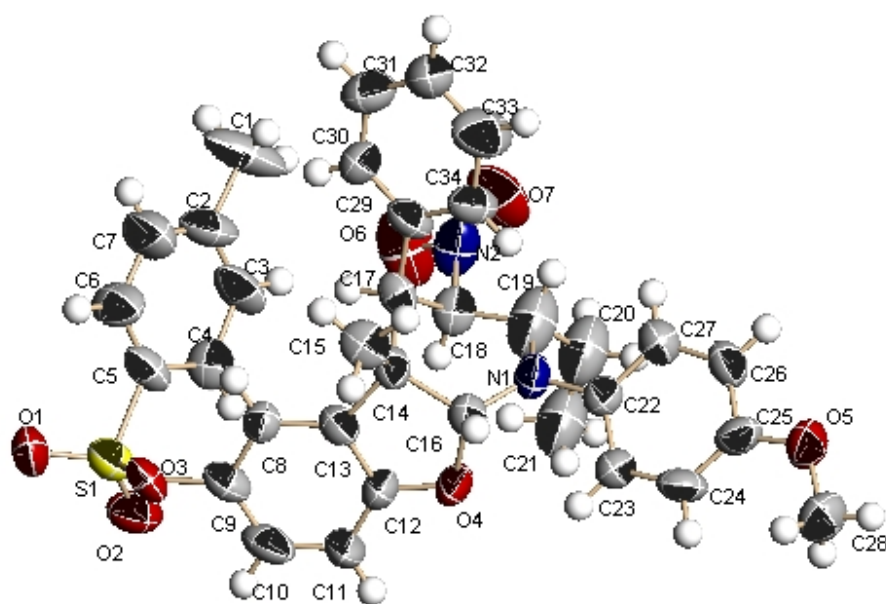

7.312  
7.294  
7.283  
7.266  
7.242  
7.227  
7.209  
6.979  
6.958  
6.855  
6.833  
6.347  
5.088  
5.076  
5.062  
4.079  
4.067  
3.769  
1.764  
1.745  
1.727  
1.709  
1.633  
1.072  
1.054  
1.036  
0.000

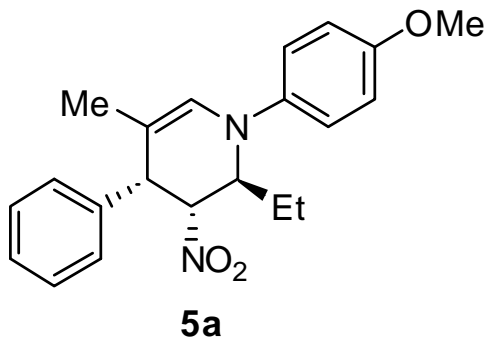

5.13  
2.00  
1.99  
0.98  
1.00  
0.99  
4.09  
2.00  
3.00  
2.98

1500  
1000  
500  
0

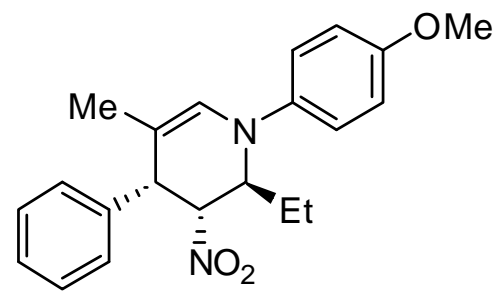

**5a**

154.656  
140.477  
136.268  
129.335  
128.466  
128.153  
127.705  
119.870  
114.487  
105.592  
86.988  
77.318  
77.000  
76.683  
57.868  
55.555  
44.316  
24.282  
18.588  
9.683

20

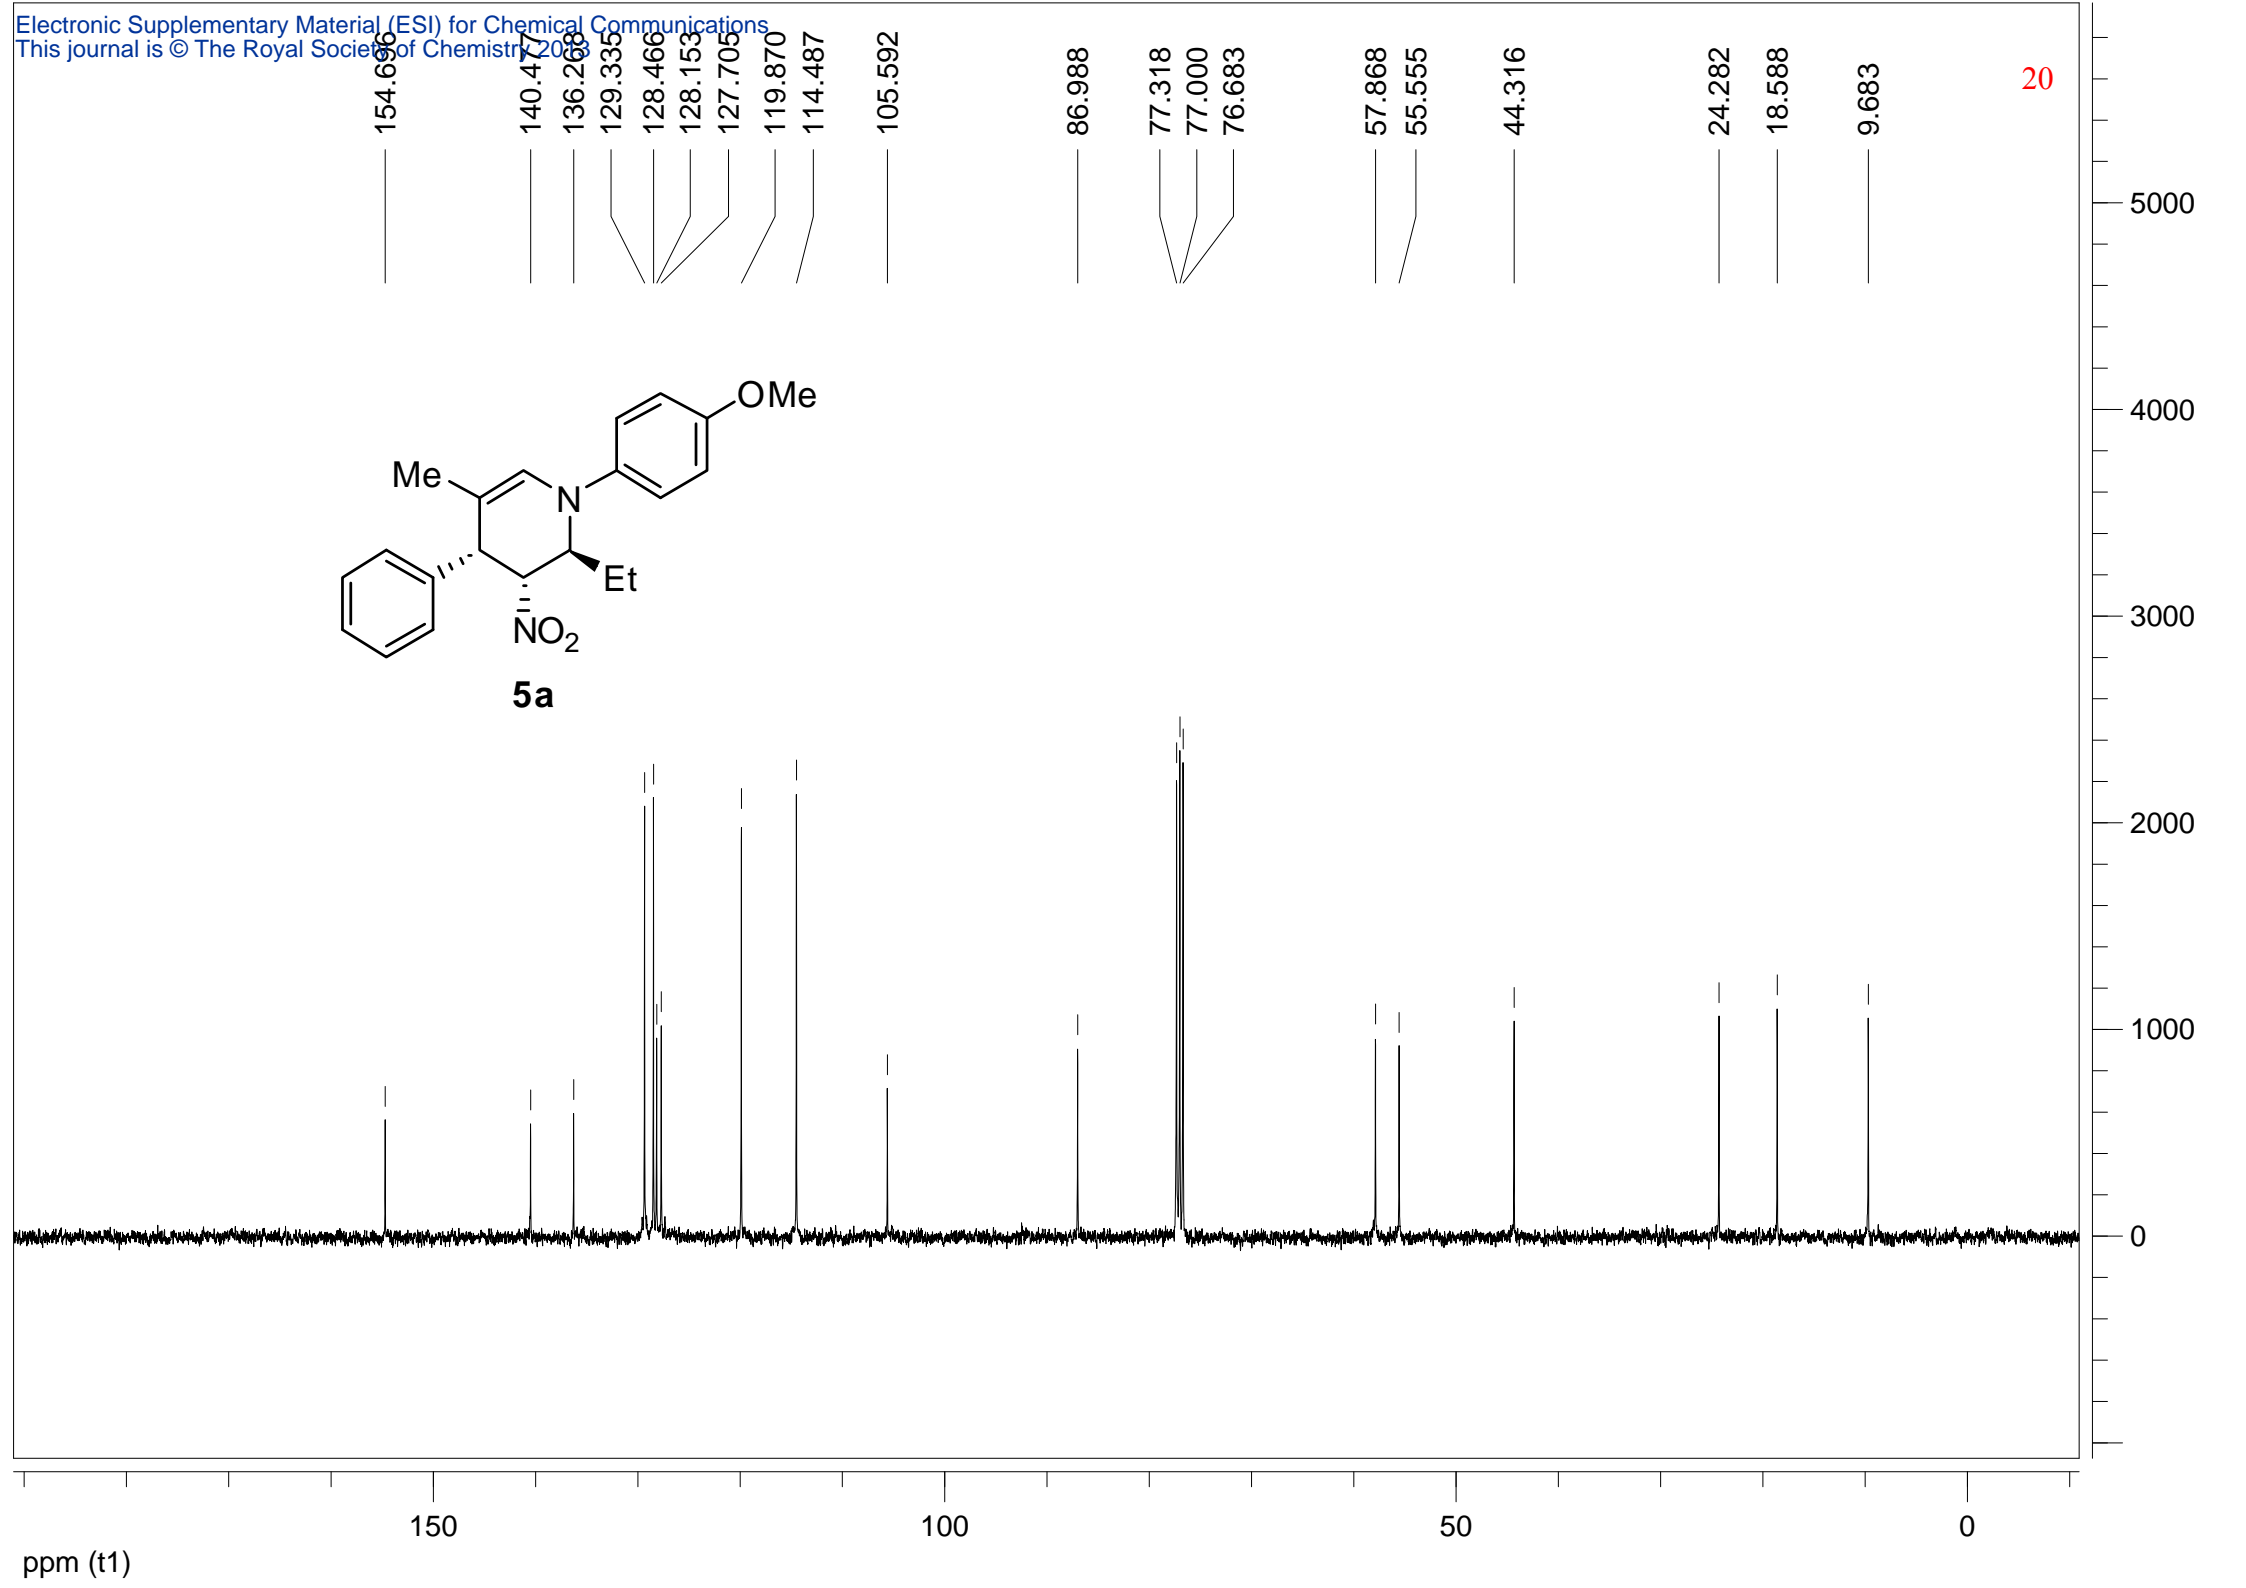

ppm (t1)

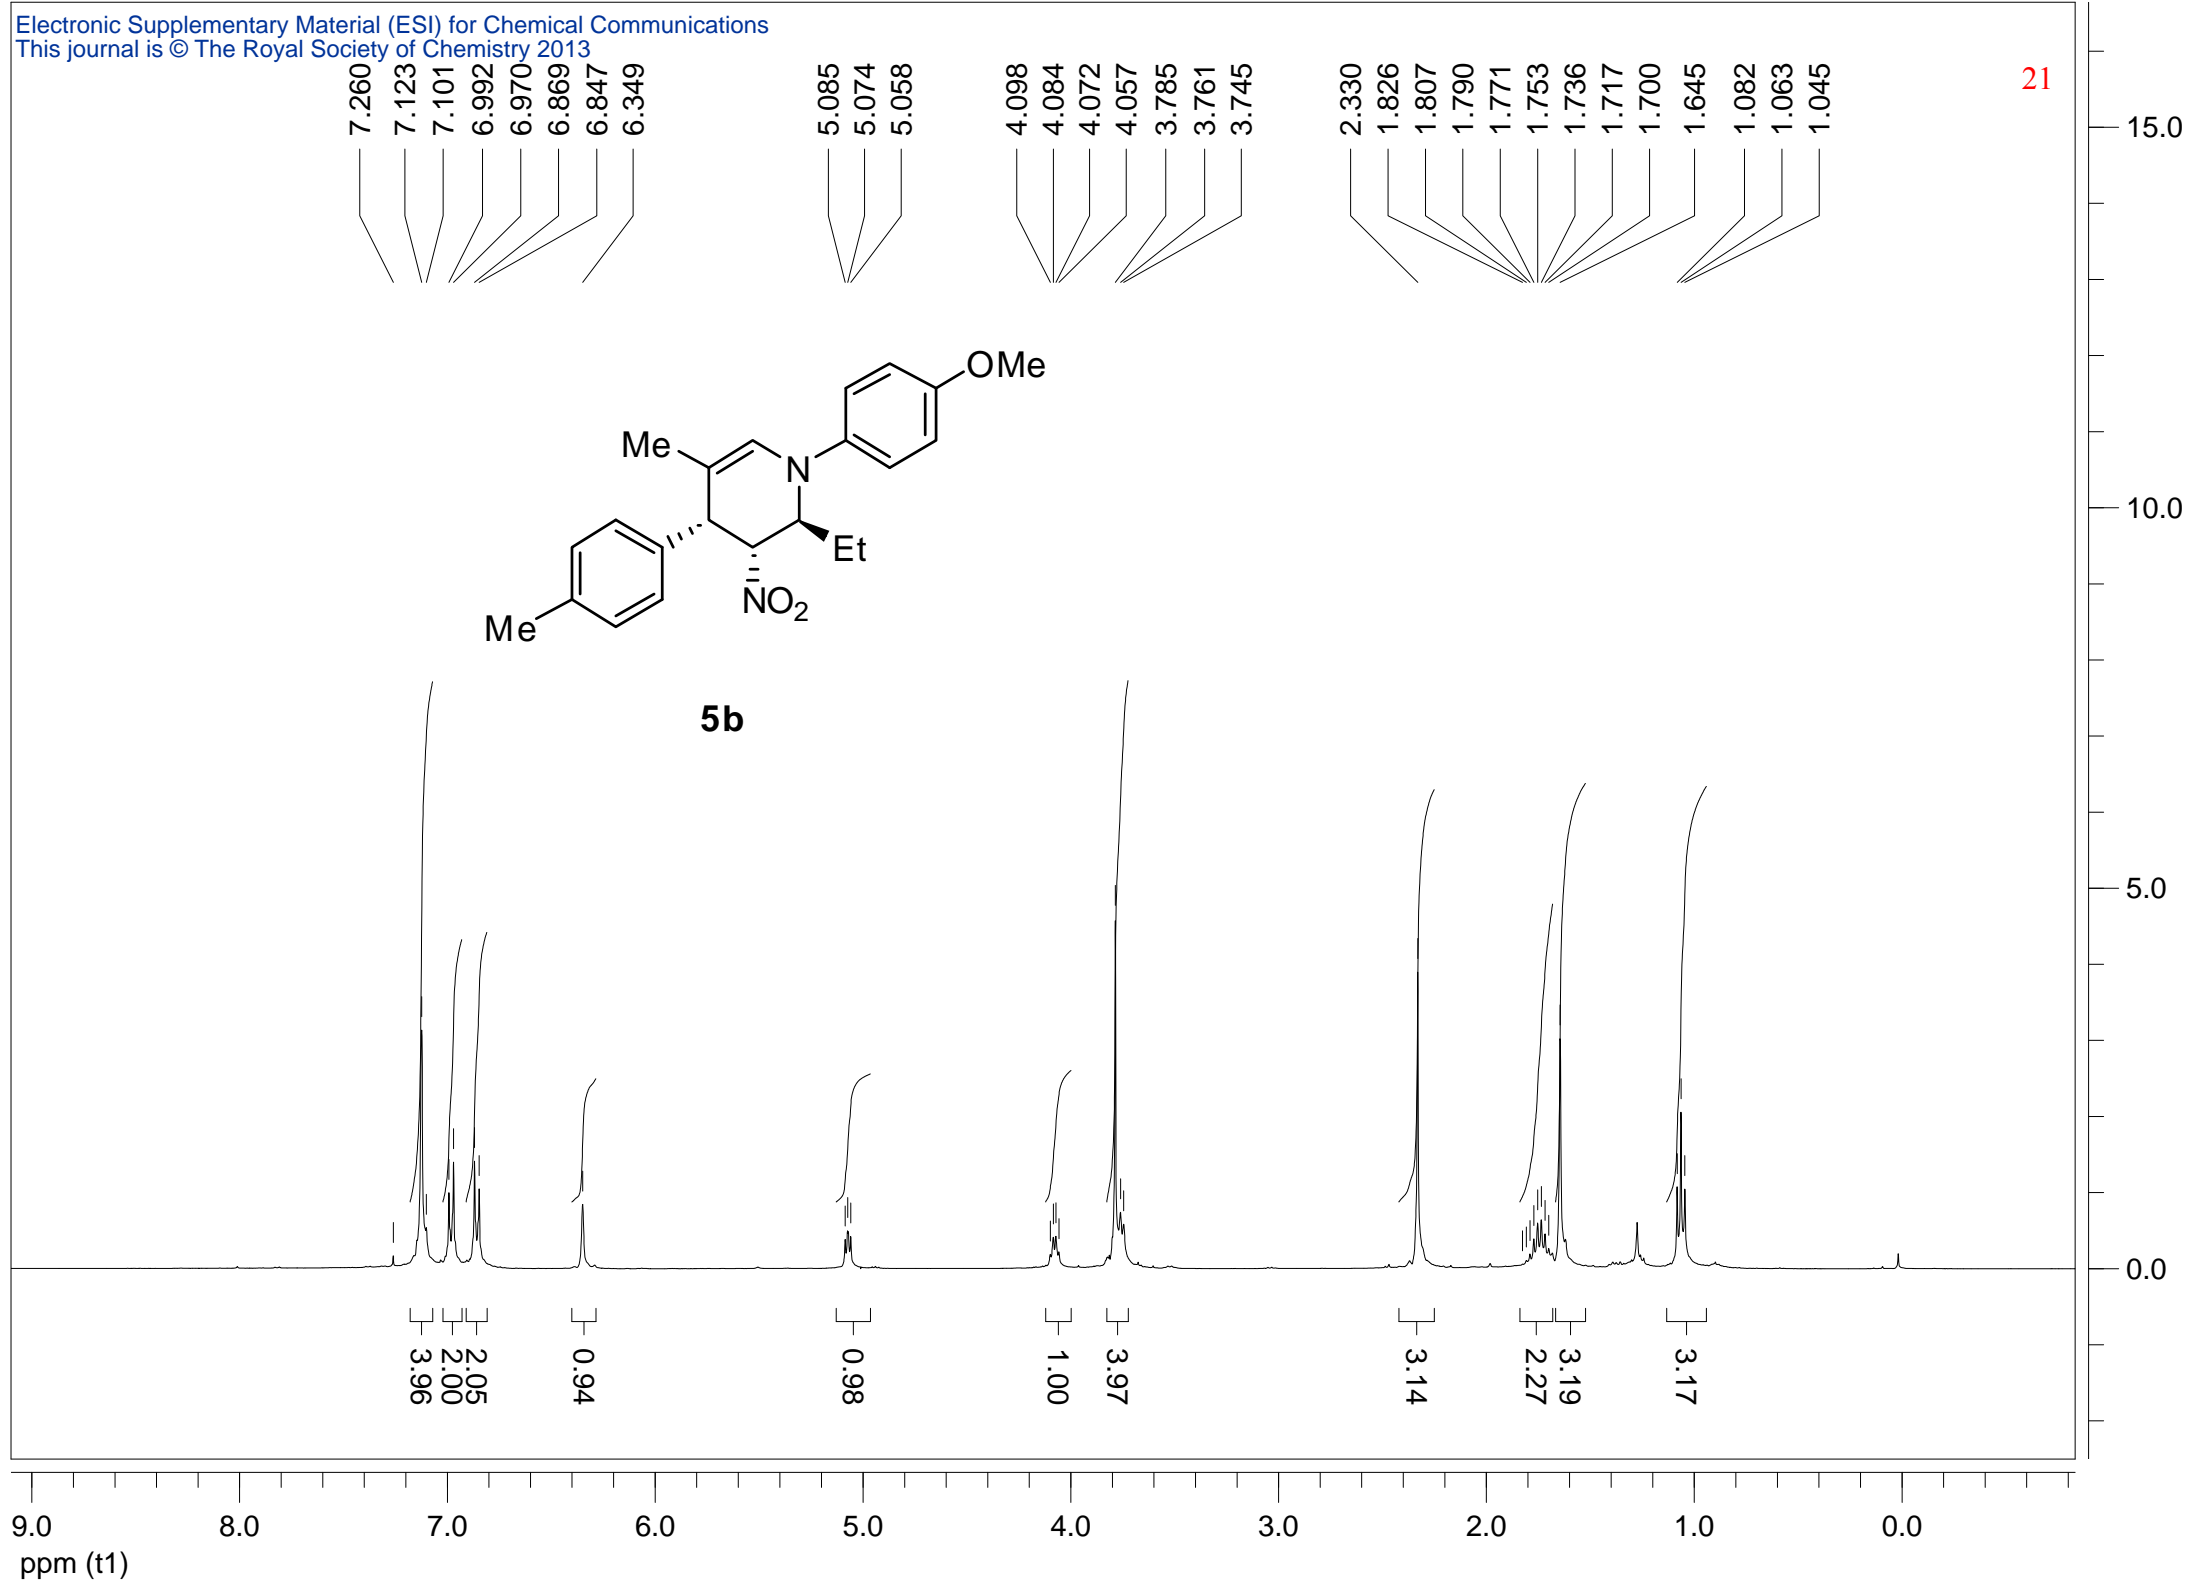

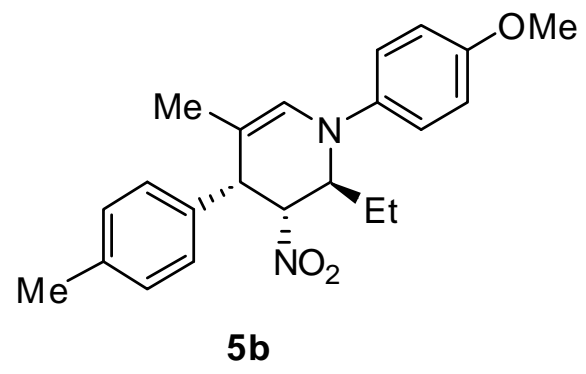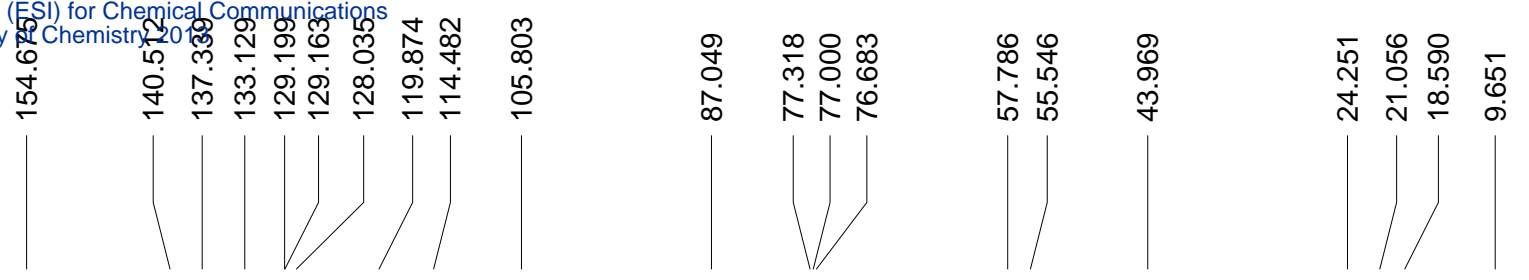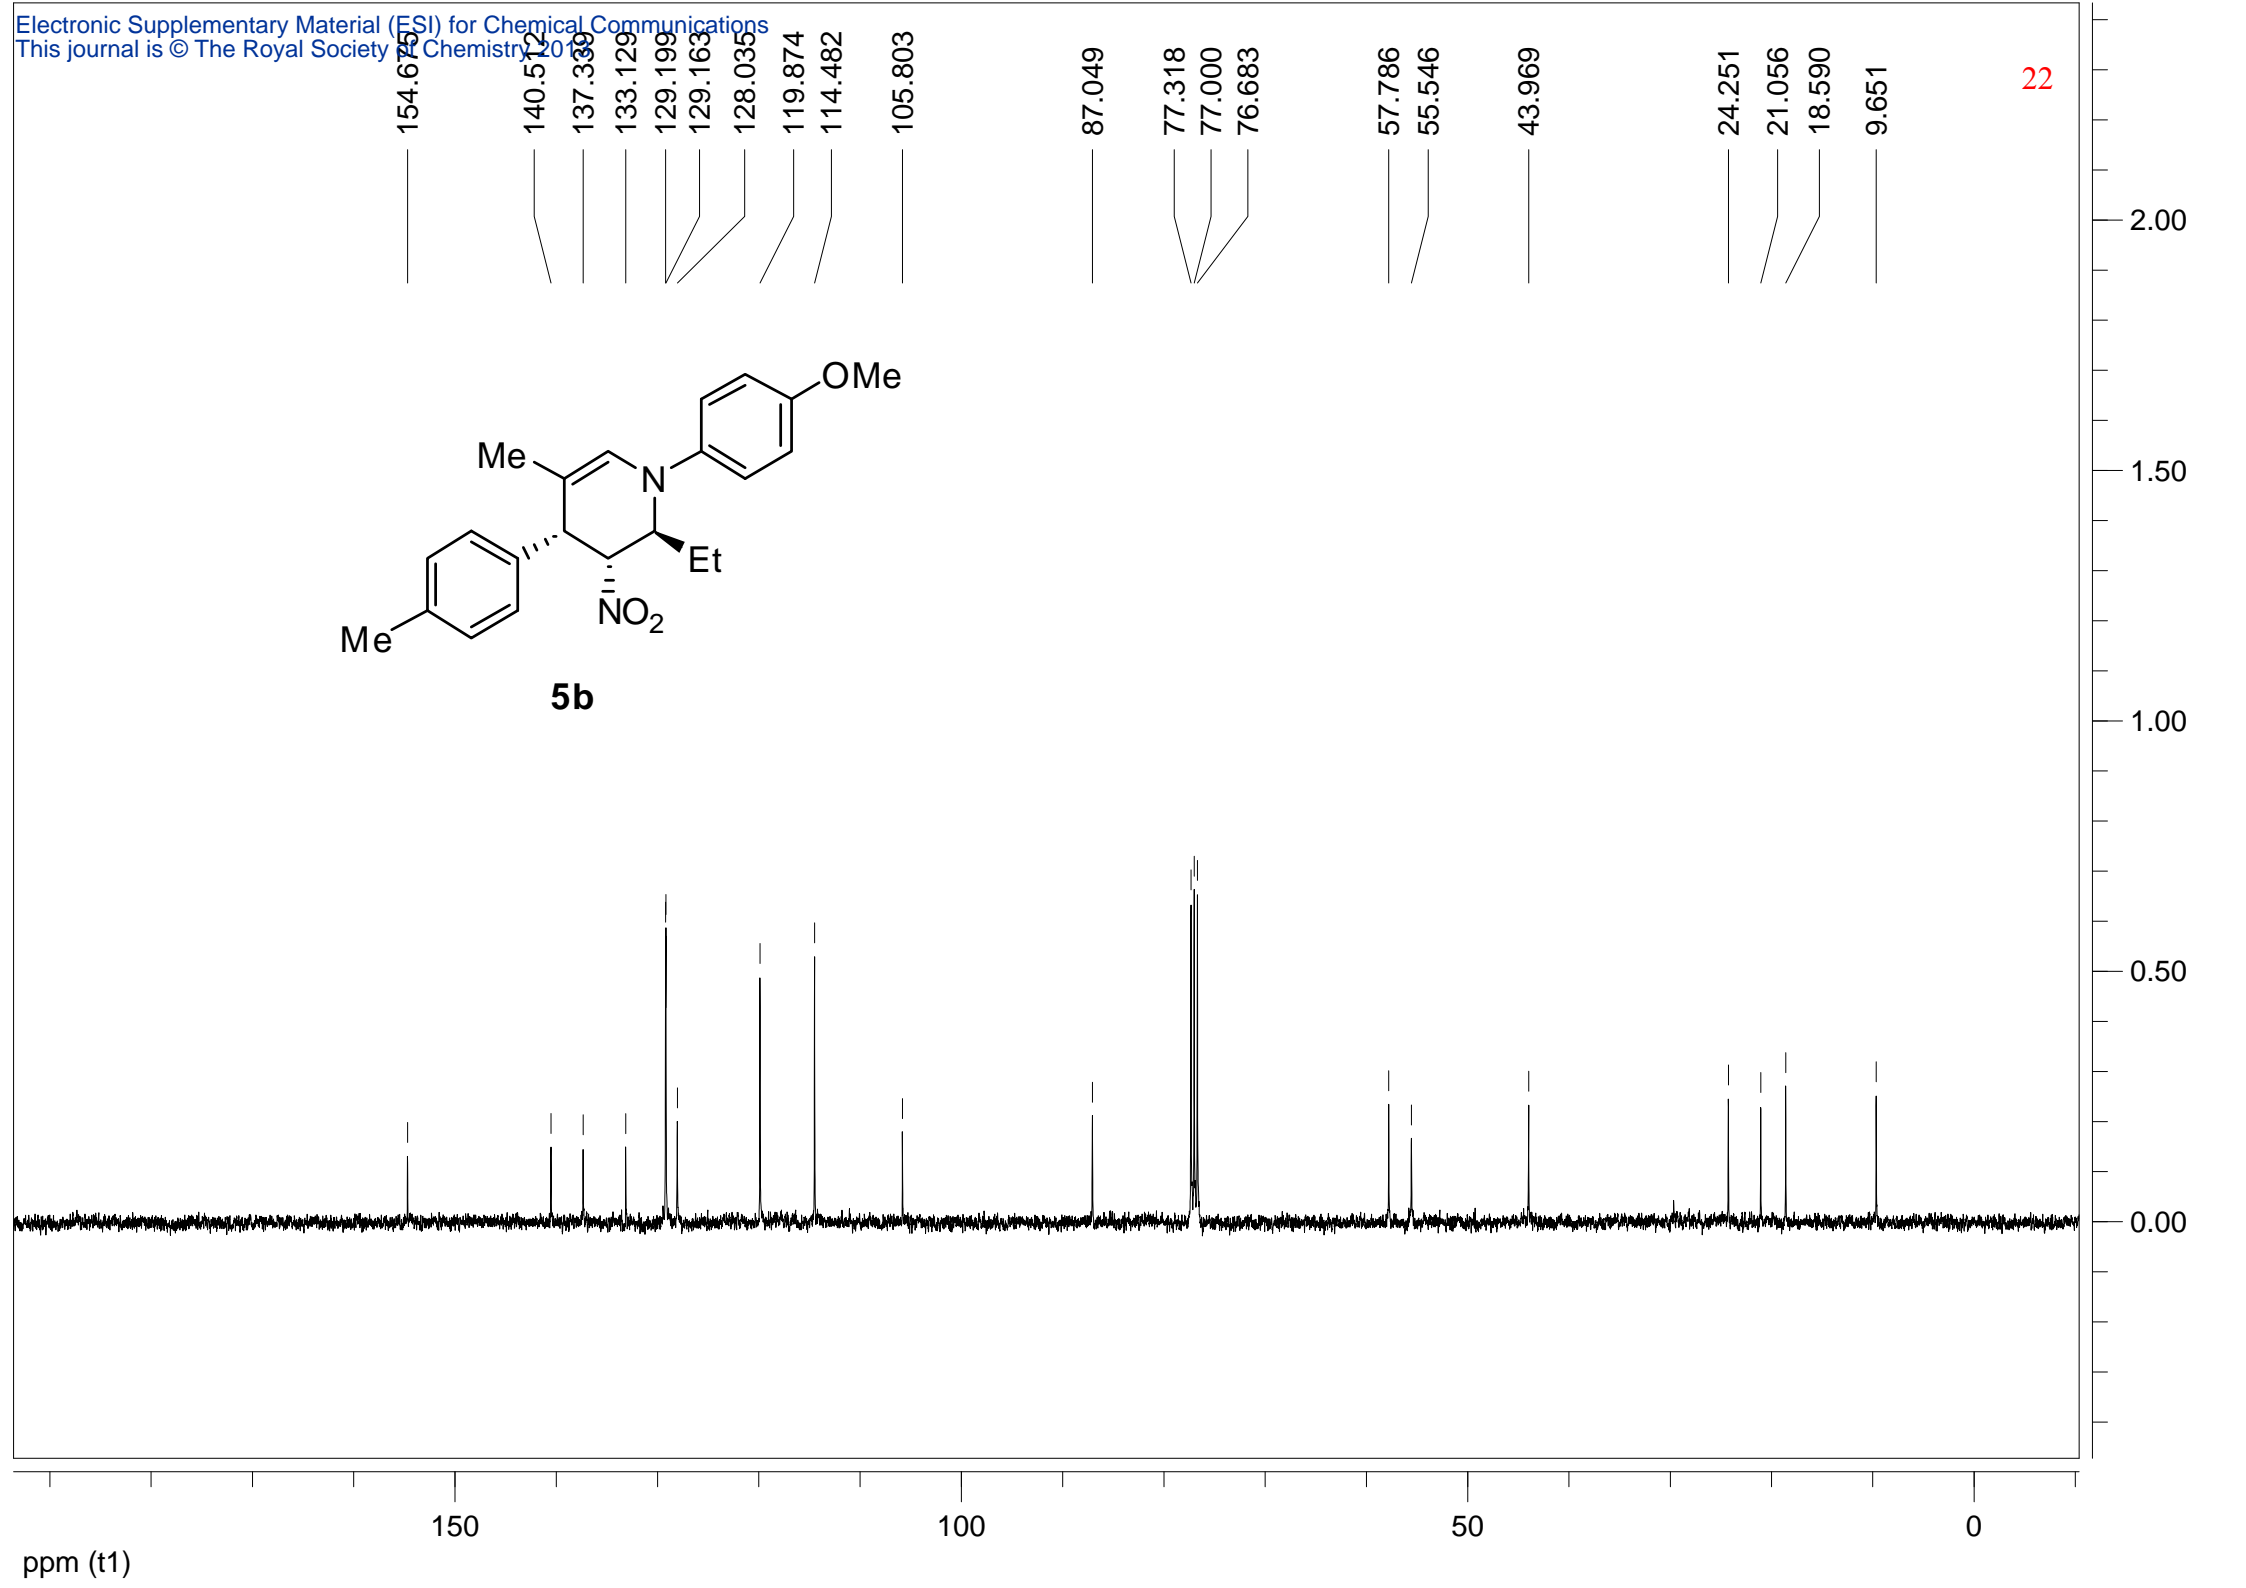



7.260  
7.149  
7.129  
6.983  
6.962  
6.861  
6.840  
6.333  
5.068  
5.055  
5.043  
4.072  
4.059  
3.781  
3.745  
3.728  
1.760  
1.743  
1.725  
1.708  
1.690  
1.629  
1.070  
1.052  
1.034

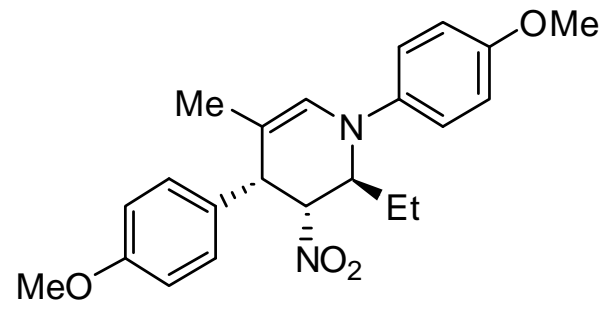

5c

2.10  
2.18  
3.93  
0.84  
1.00  
1.18  
6.90  
2.76  
3.18  
2.92

ppm (t1)

159.178  
154.835  
140.645  
130.466  
130.196  
128.183  
120.059  
114.633  
114.016  
106.070  
87.212  
77.463  
77.145  
76.827  
57.888  
55.684  
55.251  
43.749  
29.788  
24.365  
18.719  
9.780

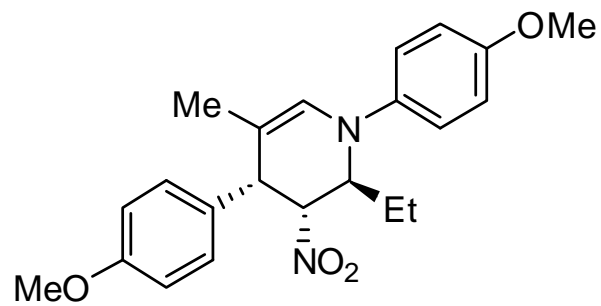

5c

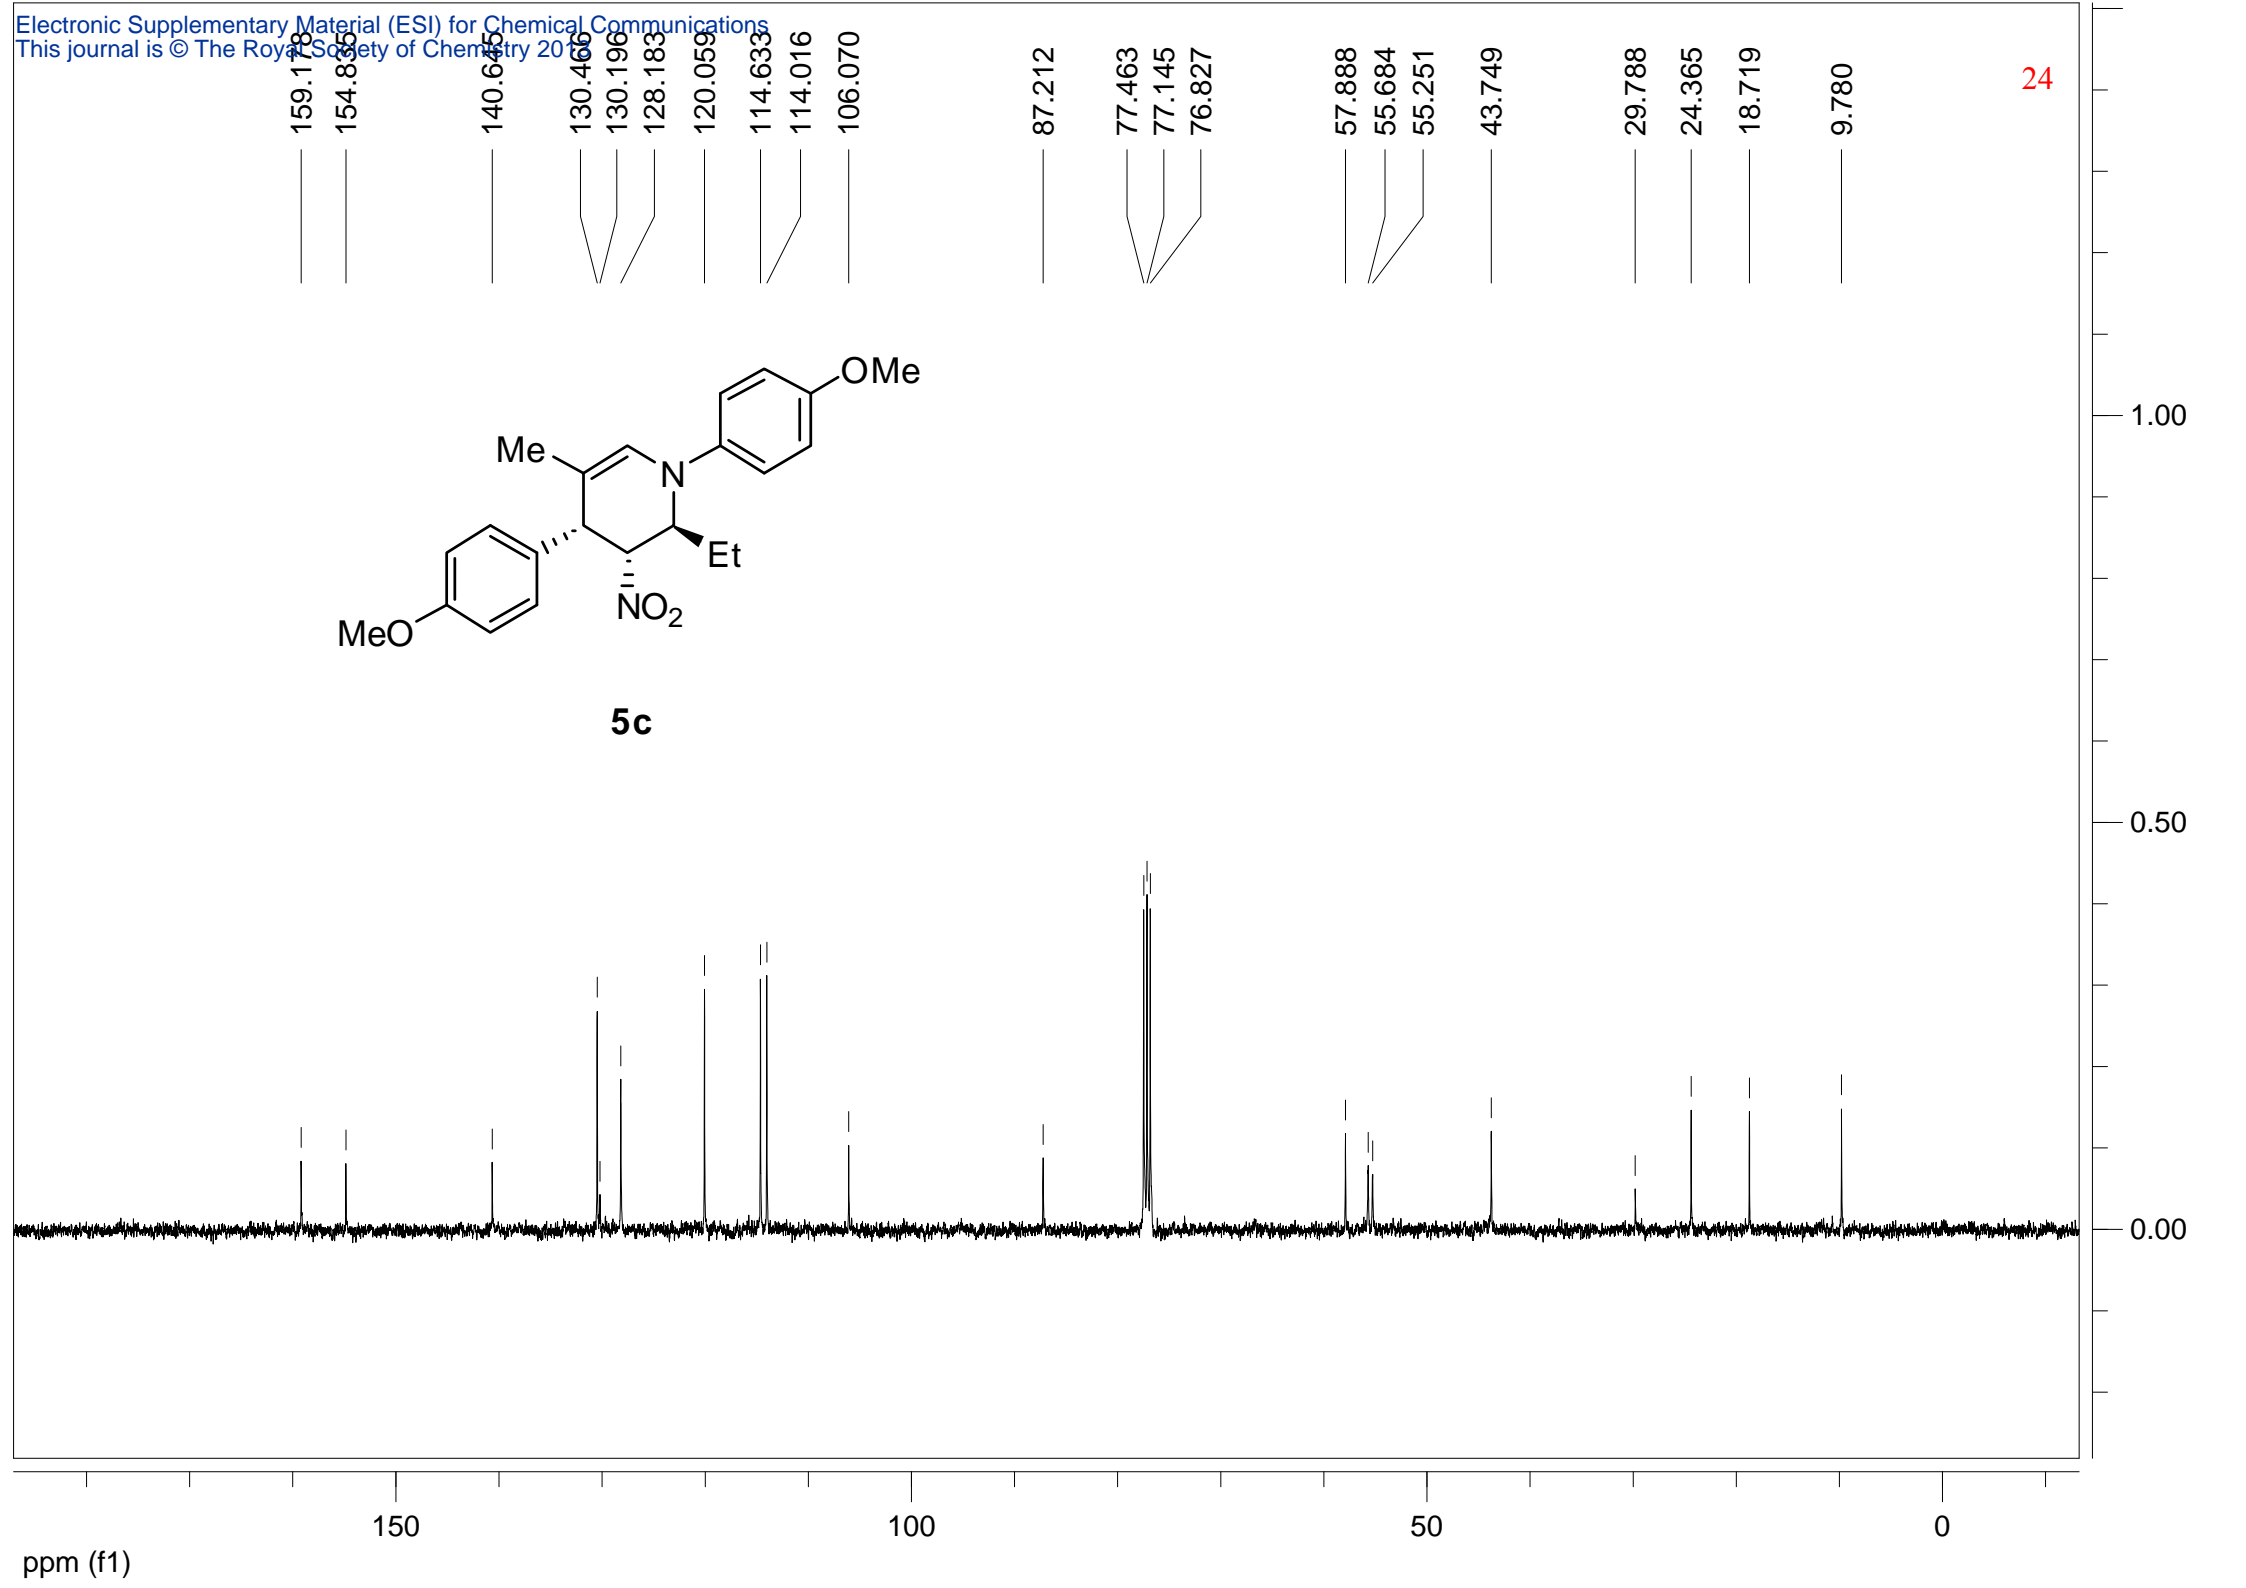

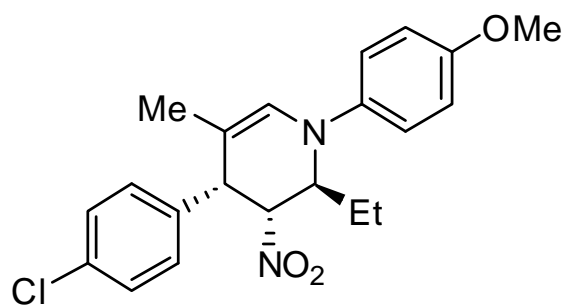

**5d**

7.299  
7.278  
7.174  
7.154  
6.971  
6.949  
6.860  
6.838  
6.352

5.068  
5.055  
5.043

4.074  
4.062  
3.778  
3.754  
3.740

1.760  
1.742  
1.724  
1.707  
1.614  
1.072  
1.054  
1.036

25

5.0

0.0

2.00  
1.97  
1.94  
2.04

0.88

1.00

1.02  
4.16

2.09  
2.94

2.92

ppm (t1)

8.0

7.0

6.0

5.0

4.0

3.0

2.0

1.0

0.0

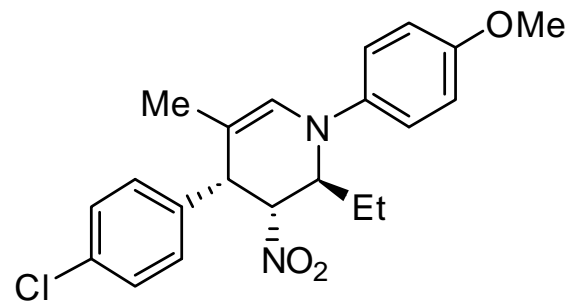

**5d**

154.827  
140.252  
134.853  
133.600  
130.690  
128.693  
128.496  
119.930  
114.525  
104.982

86.824  
77.318  
77.000  
76.682

57.861  
55.571

43.702

24.246  
18.474

9.664

ppm (t1)

150

100

50

0

1.00

0.50

0.00

7.296  
7.277  
7.260  
7.171  
7.152  
6.967  
6.947  
6.857  
6.836  
6.348

5.066  
5.053  
5.041

4.071  
4.059  
3.778  
3.752  
3.736  
3.664

1.776  
1.758  
1.740  
1.723  
1.705  
1.688  
1.671  
1.649  
1.611  
1.071  
1.053  
1.034

27

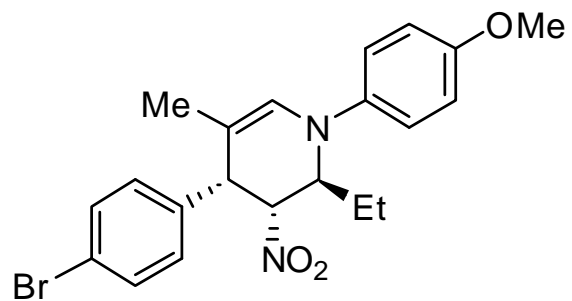

**5e**

2.11  
2.01  
2.05  
2.07

0.96

1.00

1.09

4.17

2.06  
3.19

3.03

8.0

7.0

6.0

5.0

4.0

3.0

2.0

1.0

0.0

ppm (t1)

5.0

0.0

154.866  
140.297  
134.860  
133.620  
130.694  
128.706  
128.543  
119.962  
114.536  
104.978

86.831  
77.317  
77.000  
76.681  
57.850  
55.561  
43.726  
29.663  
24.249  
18.482  
9.662

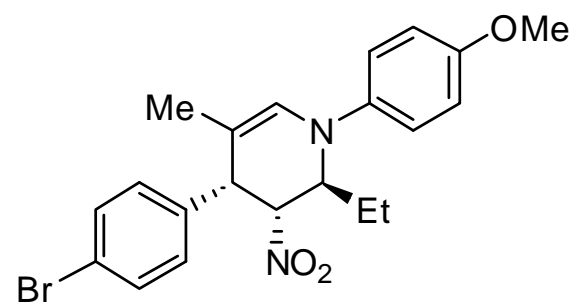

**5e**

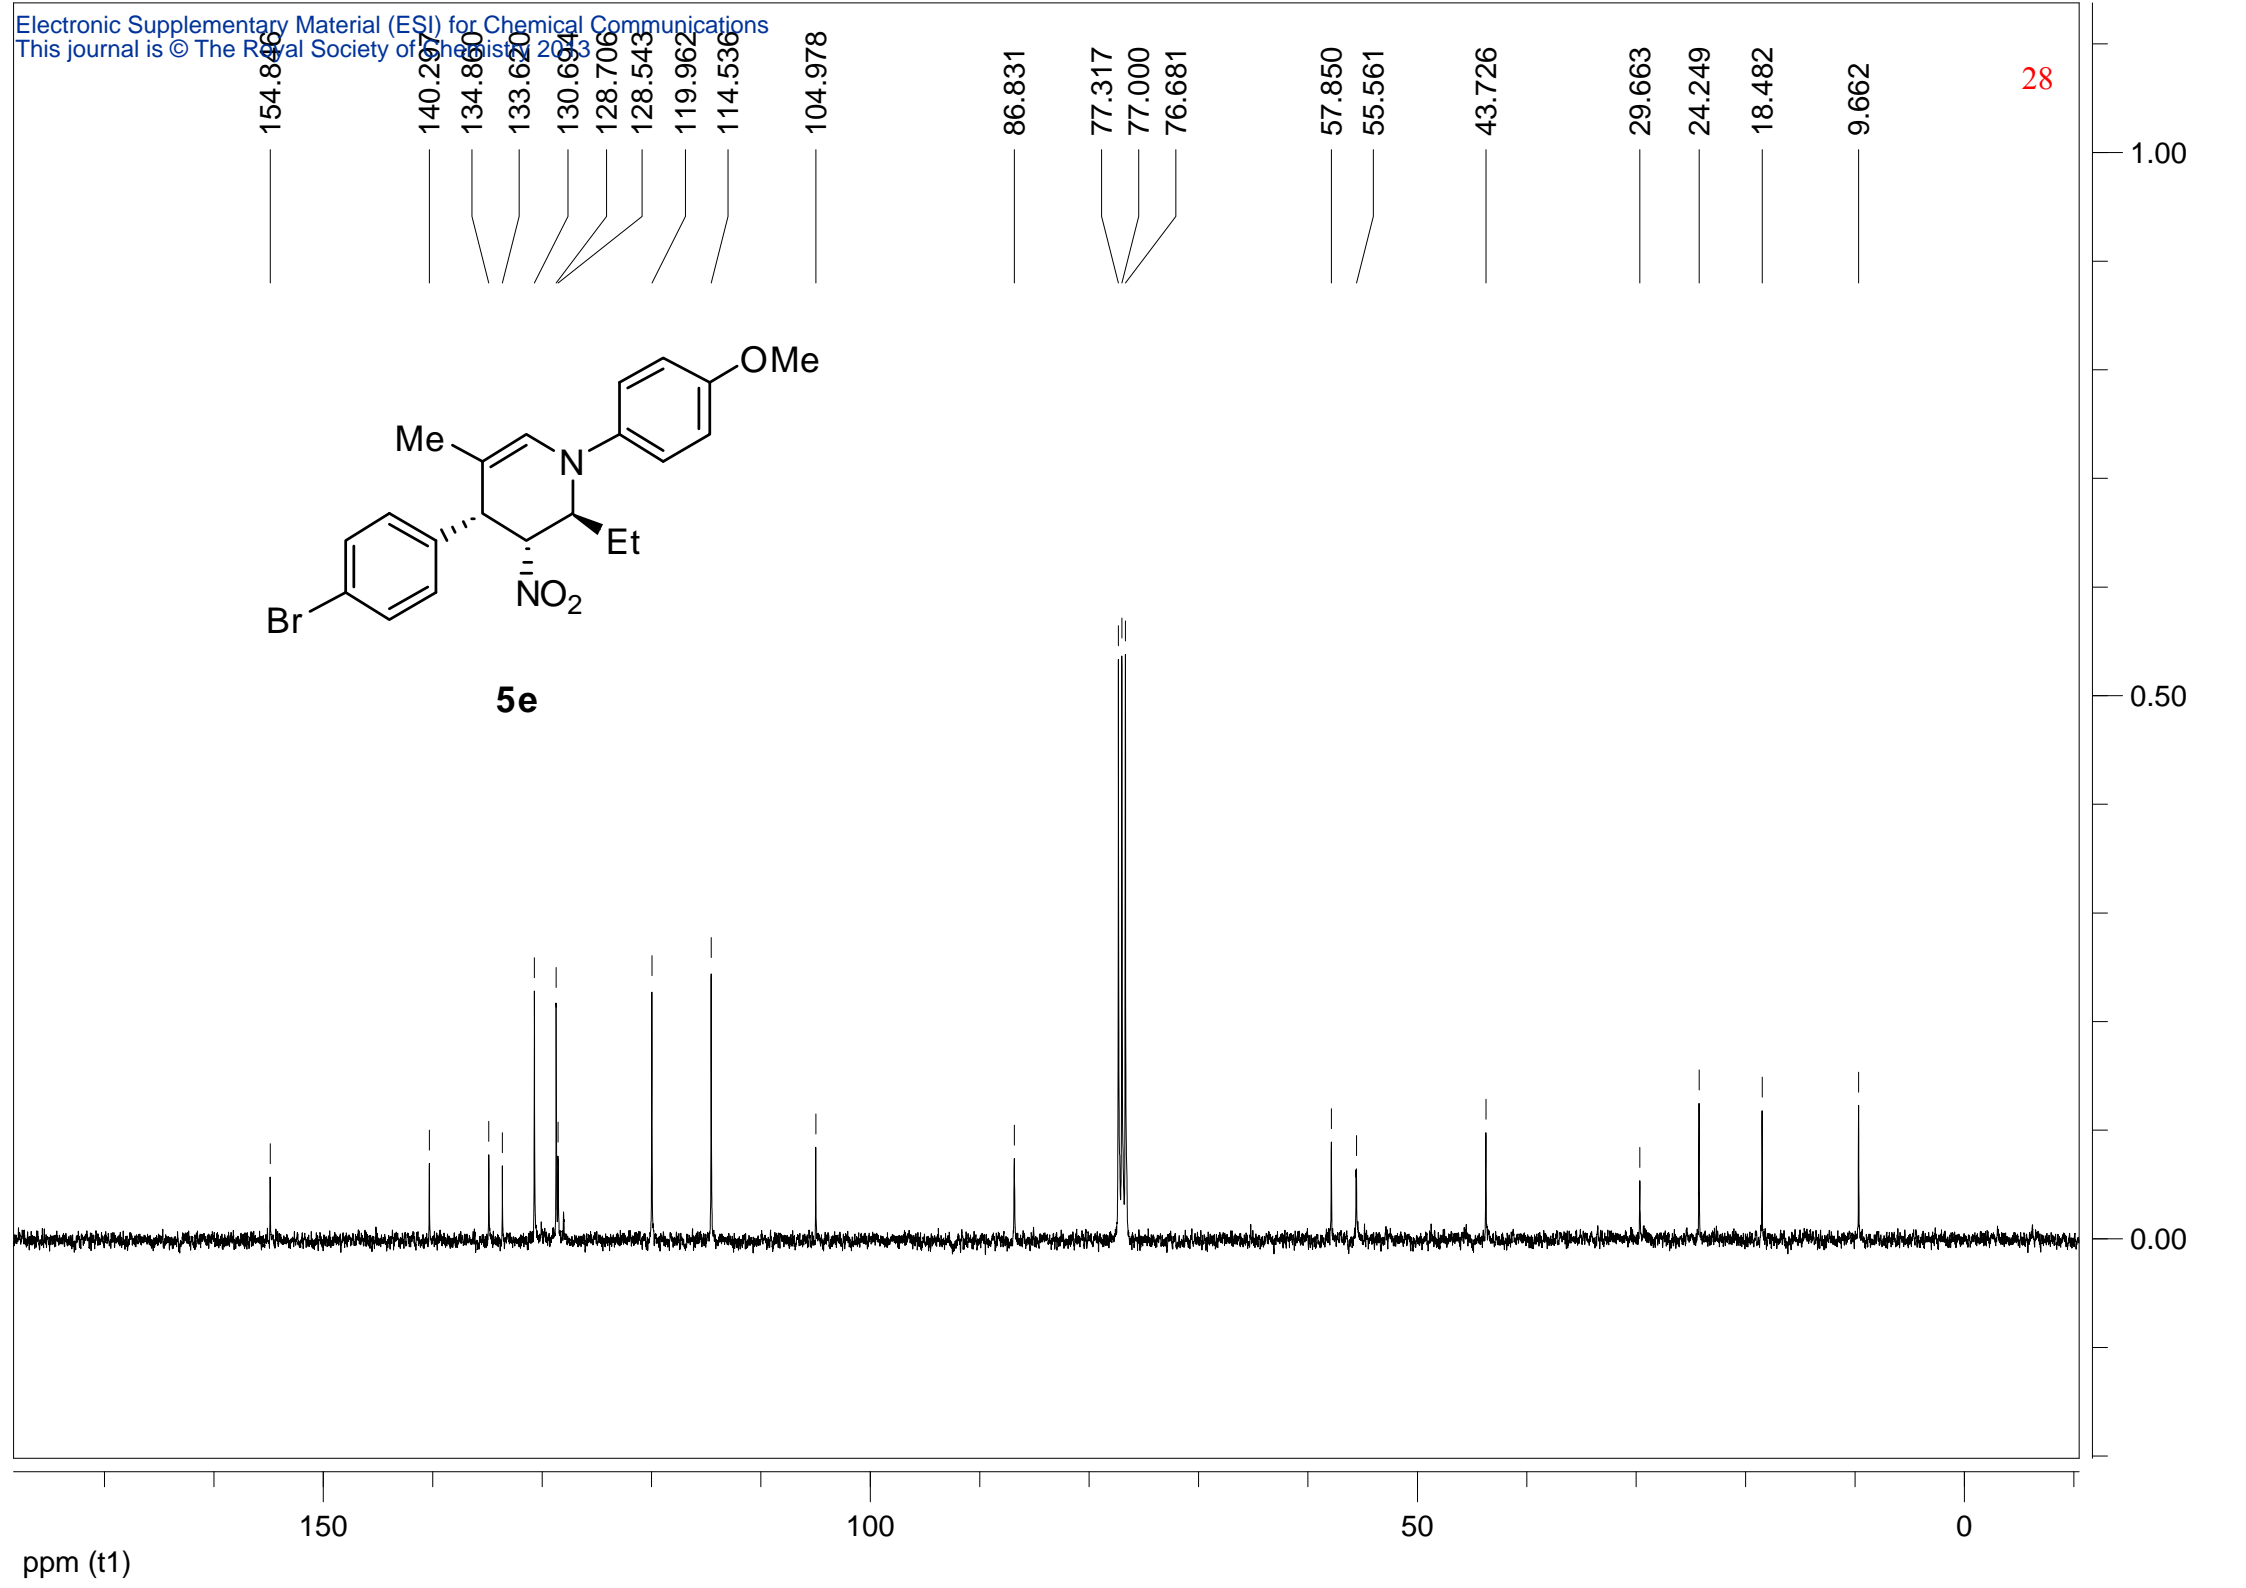

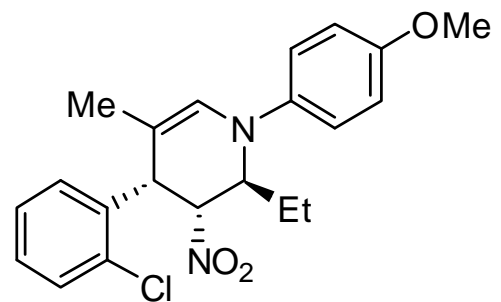

7.485  
7.466  
7.175  
7.153  
7.058  
7.041  
6.844  
6.823  
6.761  
6.741  
6.331

5.275  
5.263

4.193  
4.180  
4.042  
3.682

1.885  
1.865  
1.848  
1.830  
1.813  
1.755  
1.737  
1.720  
1.703  
1.686  
1.576  
1.132  
1.114  
1.096

29

5f

66.0  
0.99

66.0  
1.99

4.00

89.8

1.00

66.0  
1.01

3.03

1.04  
1.04

3.00

3.00

ppm (t1)

5.0

0.0

-1.0

154.162  
140.655  
134.513  
132.679  
131.567  
129.224  
127.527  
127.254  
125.659  
117.980  
114.521  
106.032

83.688  
77.318  
77.000  
76.681  
60.371  
55.571  
41.865  
25.274  
18.426  
10.731

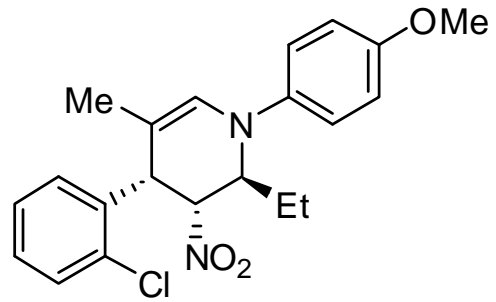

**5f**

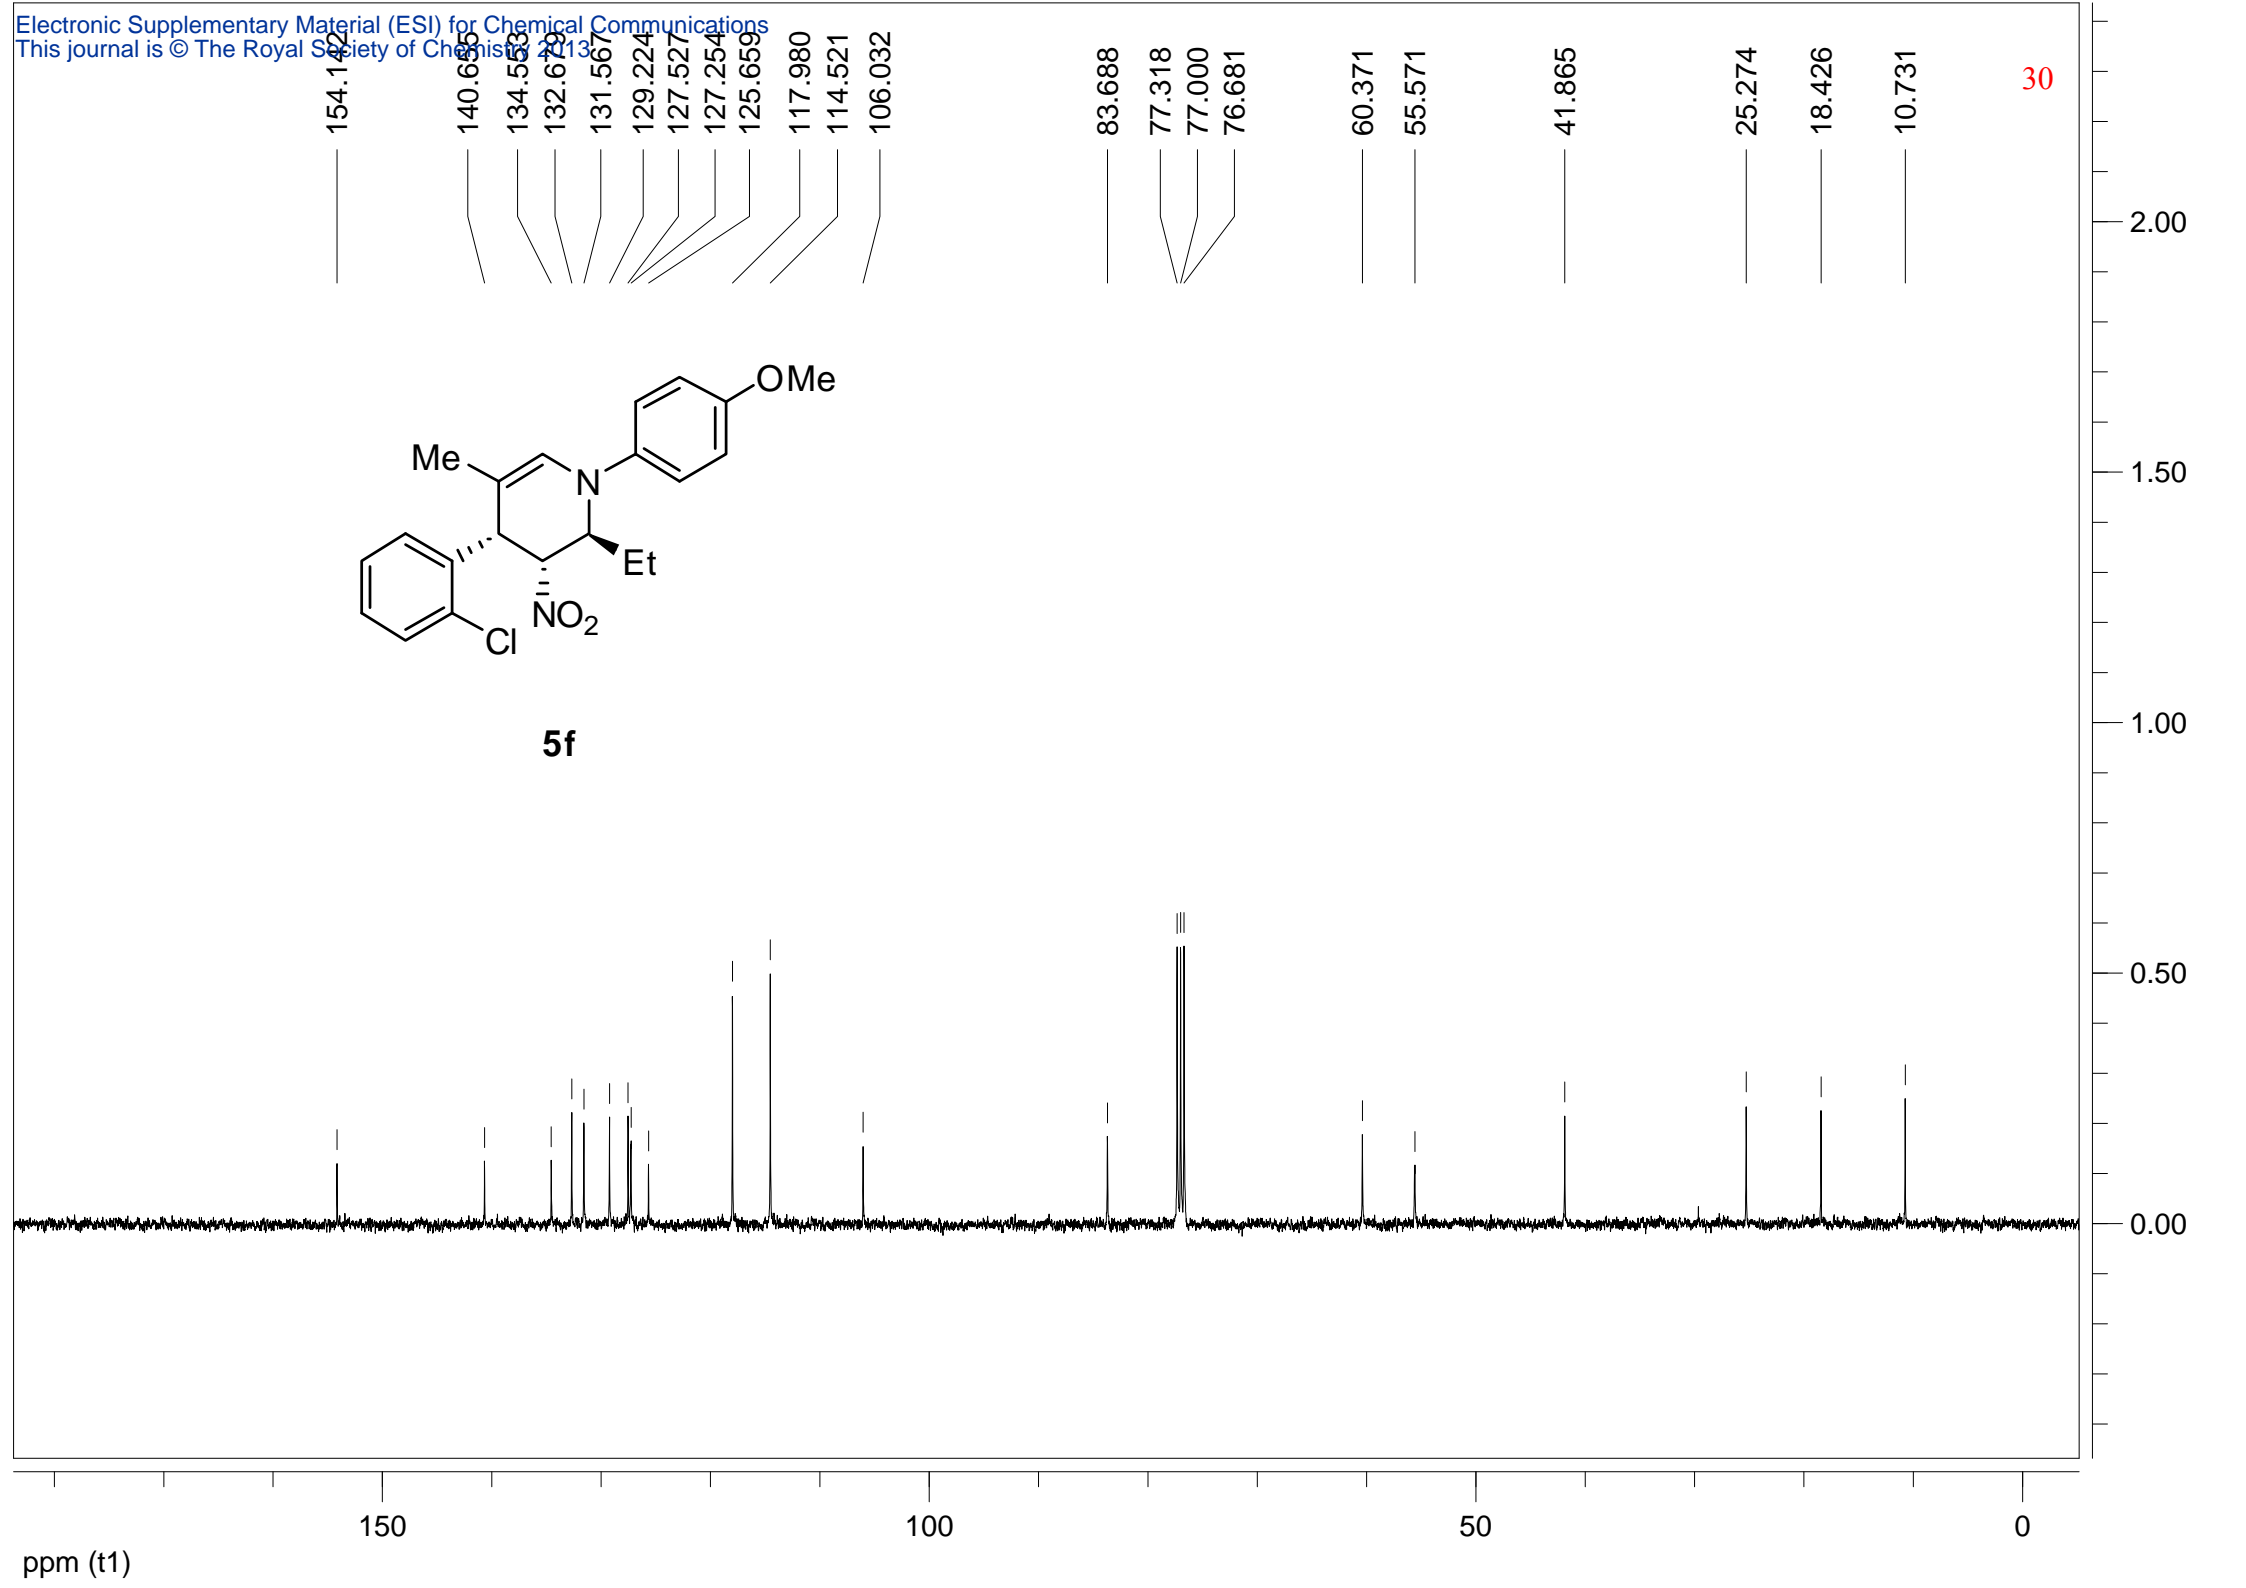



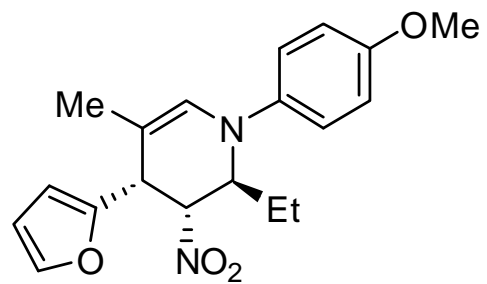

5g

7.360  
7.260  
6.967  
6.945  
6.846  
6.824  
6.335  
6.237  
6.211

5.106  
5.092  
5.080

4.142  
4.129  
4.116  
3.950  
3.937  
3.774

1.771  
1.752  
1.735  
1.716  
1.680  
1.060  
1.042  
1.023

31

1.03

2.06  
2.05

1.03  
2.00

1.00

1.03  
1.01

3.10

5.17

3.01

ppm (t1)

8.0

7.0

6.0

5.0

4.0

3.0

2.0

1.0

0.0

7.0

6.0

5.0

4.0

3.0

2.0

1.0

0.0

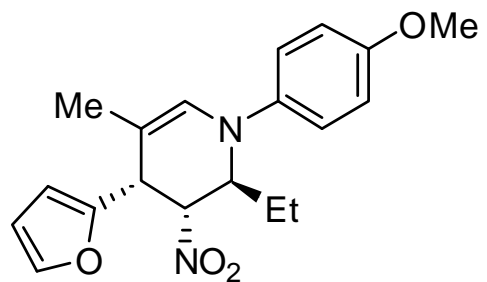

5g

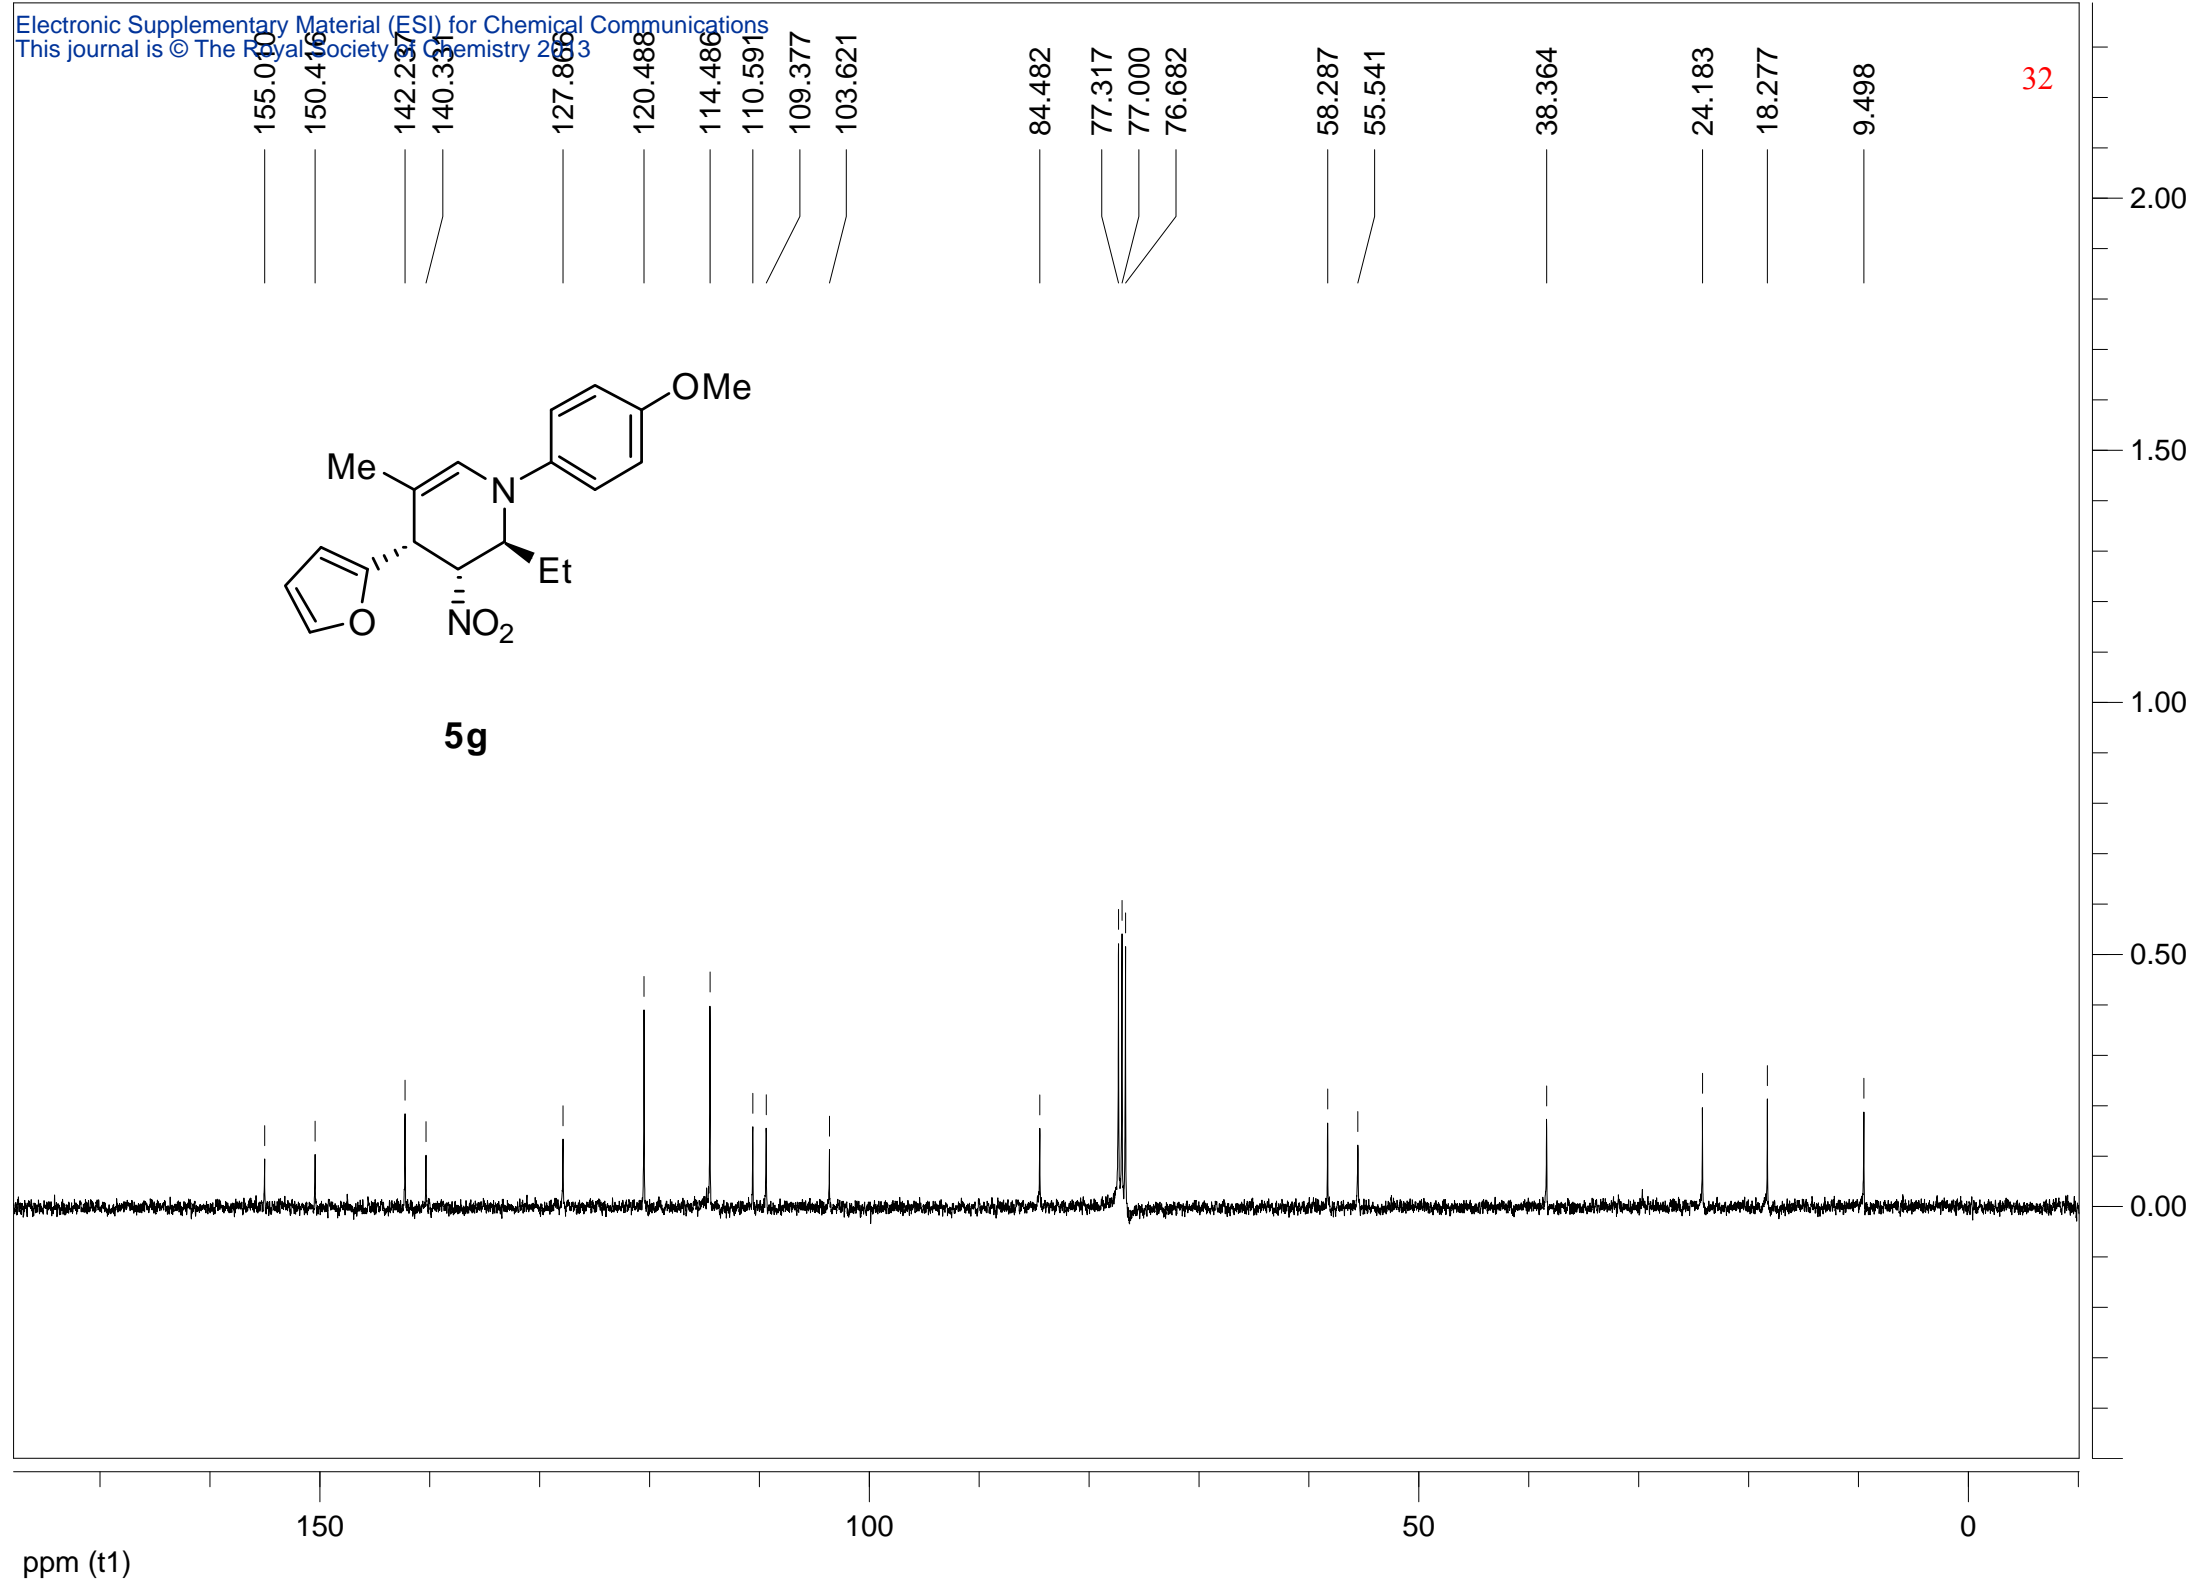

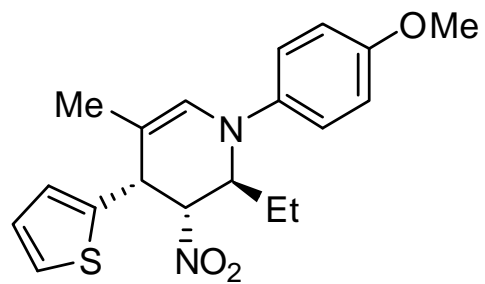

**5h**

7.243  
7.233  
7.031  
7.012  
6.961  
6.883  
6.864  
6.844  
6.200

5.086  
5.074

4.144  
4.131  
4.111  
4.099  
3.779

1.675

0.985  
0.968  
0.951

0.000

33

1.00  
2.97  
3.02

0.99

1.00

2.00  
3.02

5.01

2.99

-1.0

0.0

1.0

2.0

3.0

4.0

5.0

6.0

7.0

8.0

9.0  
ppm (f1)

8.0

7.0

6.0

5.0

4.0

3.0

2.0

1.0

0.0

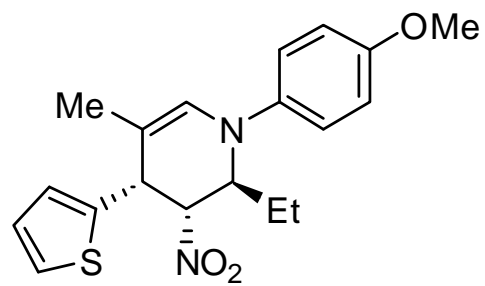

5h

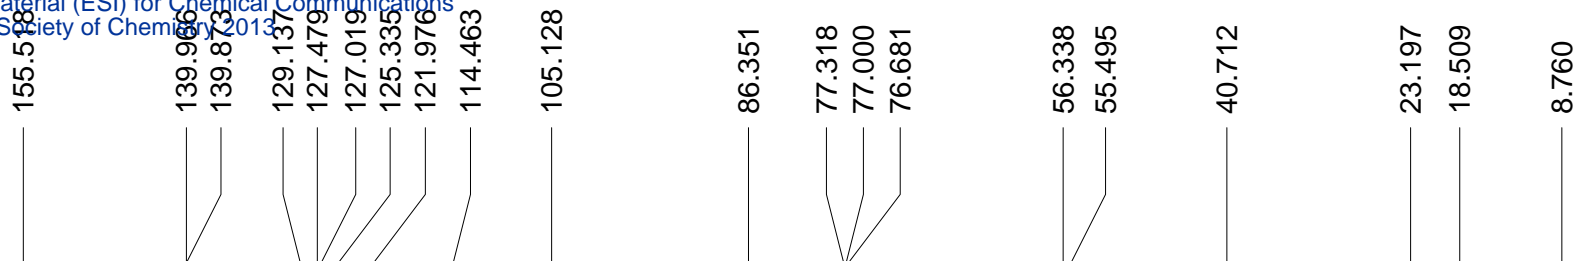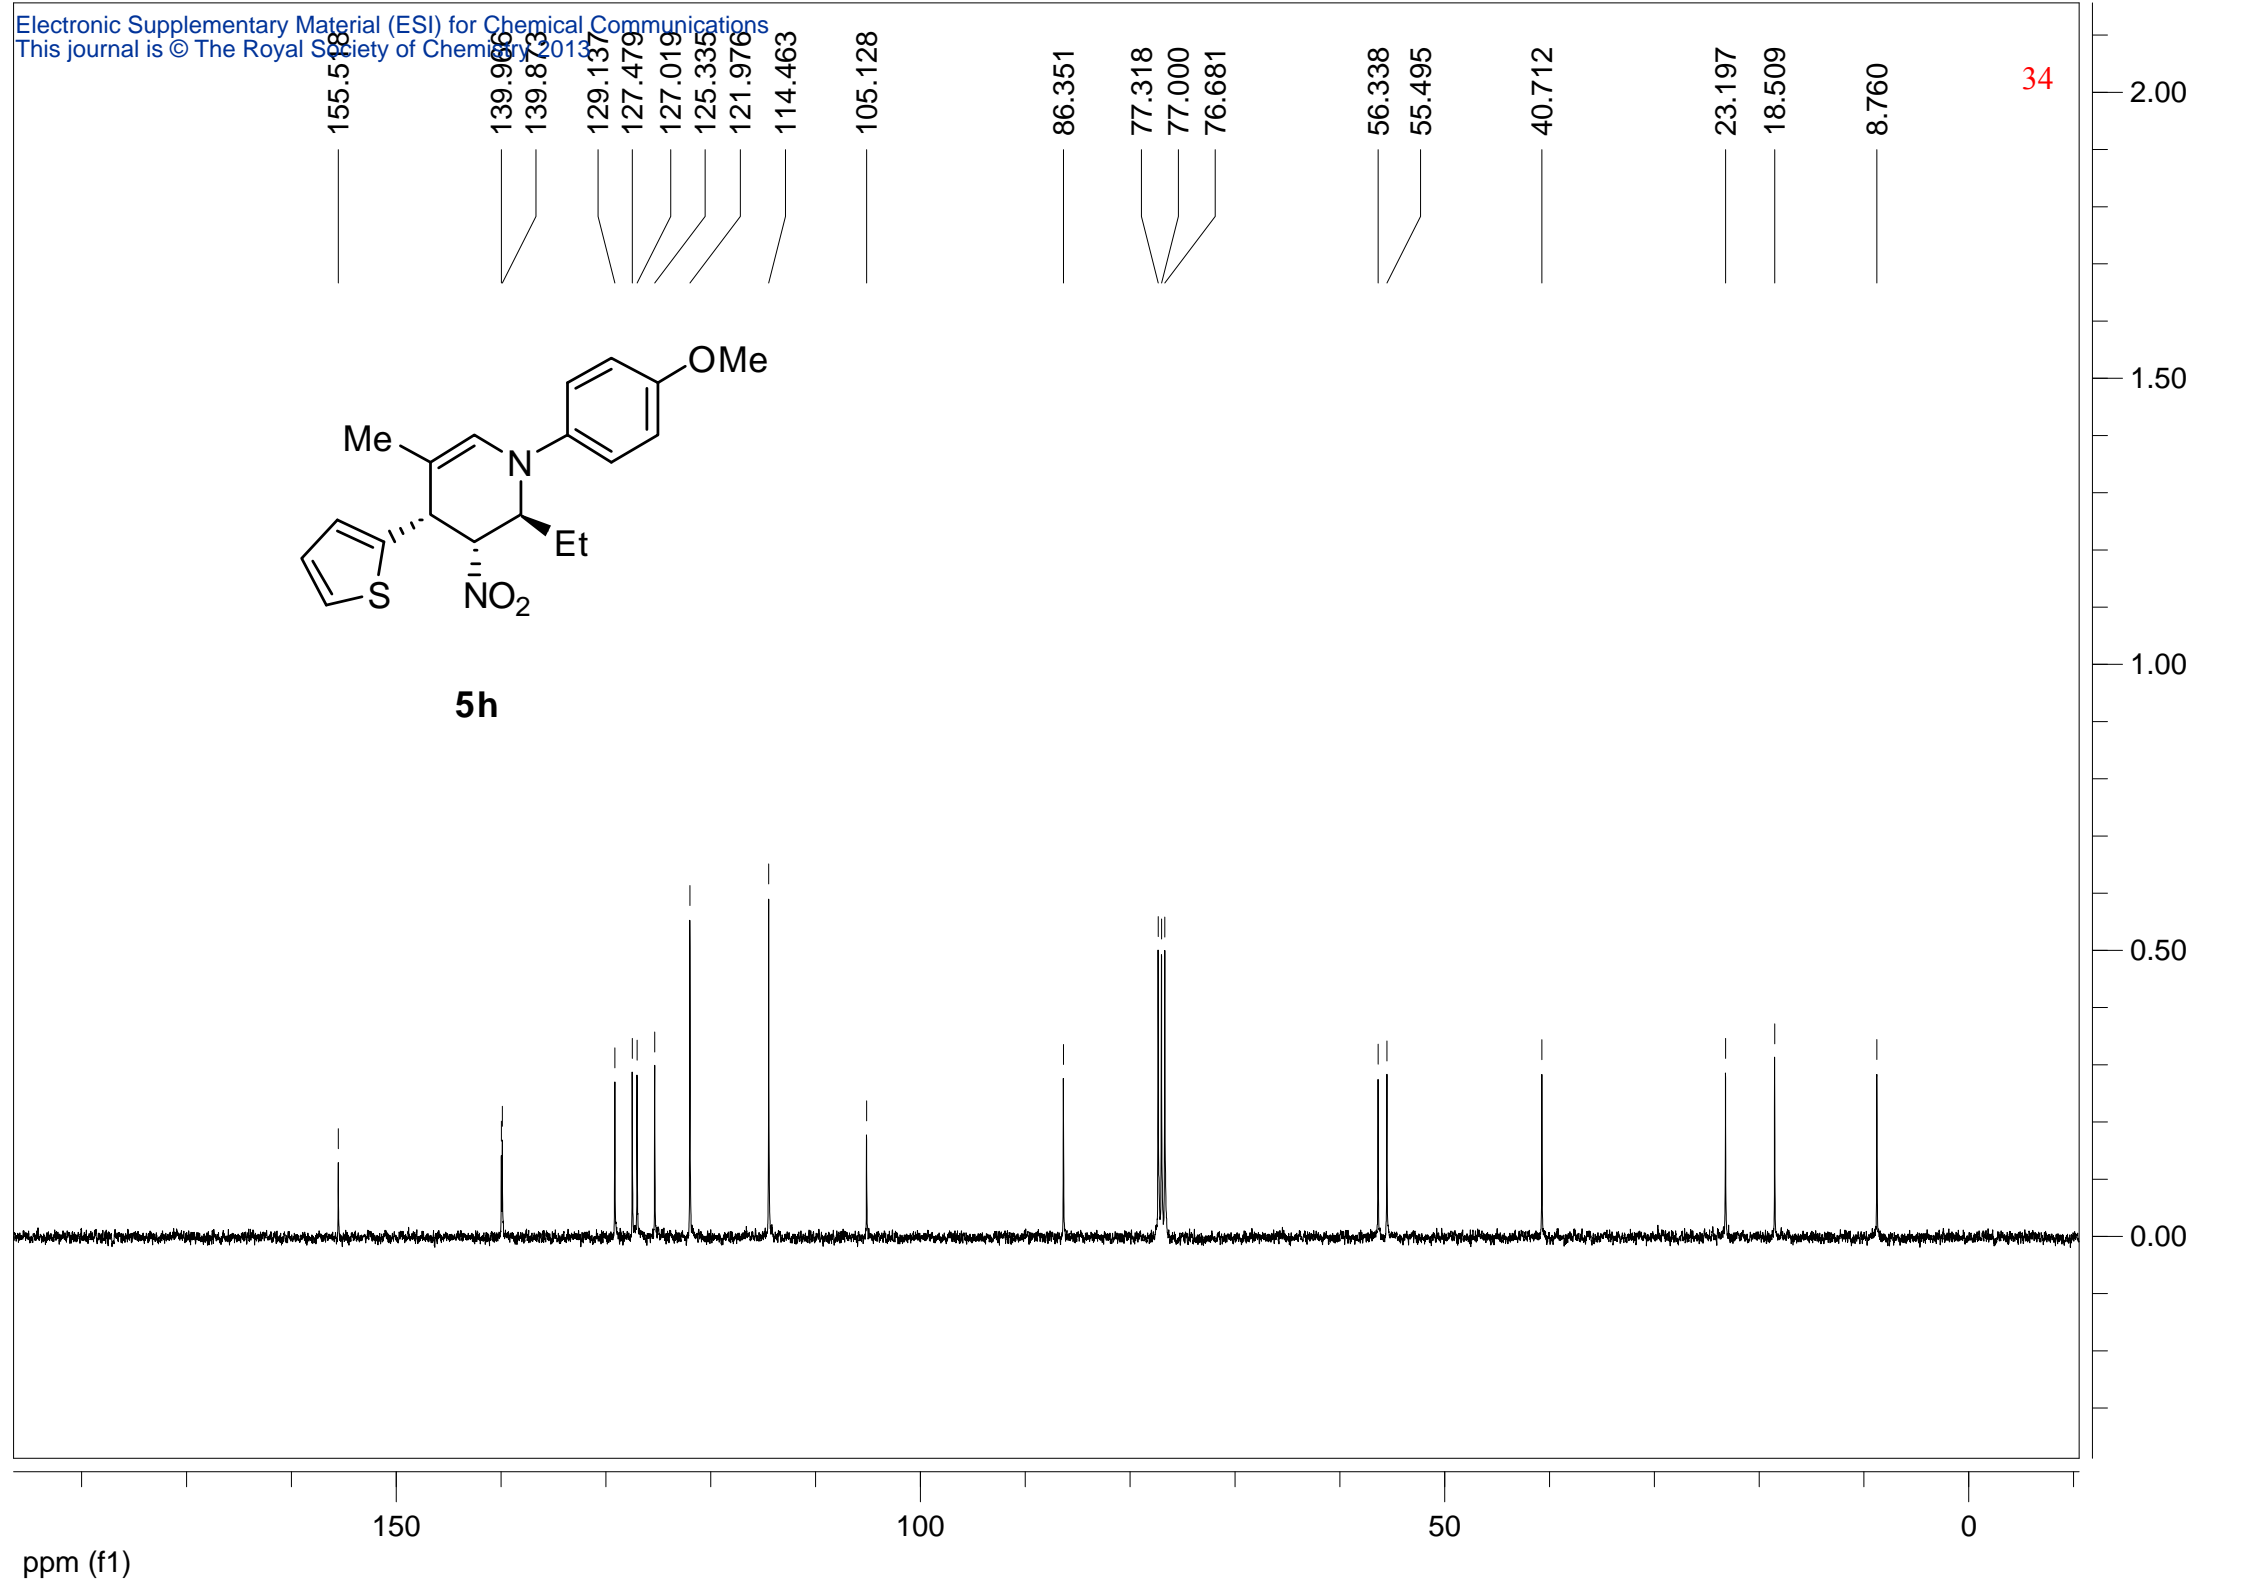

7.302  
7.284  
7.262  
7.228  
7.212  
6.968  
6.948  
6.854  
6.833  
6.365  
5.049  
4.143  
4.133  
3.870  
3.857  
3.768  
2.069  
2.051  
2.032  
2.008  
1.989  
1.971  
1.953  
1.708  
1.690  
1.672  
1.663  
1.639  
1.626  
1.603  
1.569  
1.519  
0.978  
0.961  
0.950  
0.933  
0.915

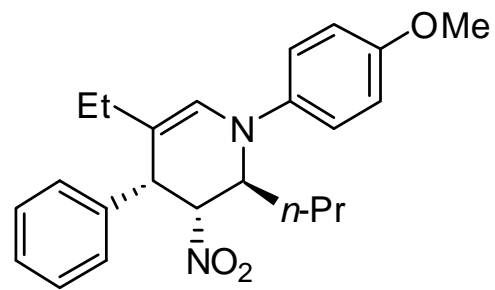

**5i**

5.03  
4.03  
0.98  
1.00  
1.01  
3.02  
2.04  
2.04  
2.00  
6.05

ppm (t1)

5.0

0.0

-1.0

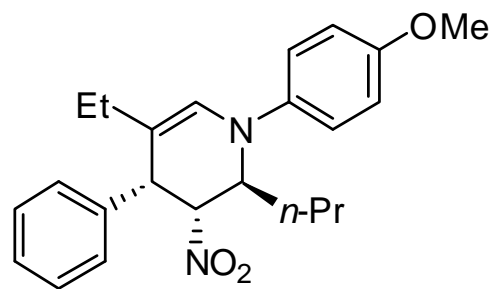

**5i**

154.659  
140.580  
136.378  
129.356  
128.437  
127.682  
126.946  
119.746  
114.511  
111.663

87.362  
77.318  
77.000  
76.682

56.957  
55.554

42.526

33.584

25.461

18.604

14.098  
13.180

36

ppm (t1)

150

100

50

0

1.50

1.00

0.50

0.00

7.294  
7.277  
7.221  
7.205  
6.927  
6.908  
6.850  
6.830  
6.384

5.023

4.214  
3.890  
3.876  
3.764

2.264  
2.249  
2.234  
1.839  
1.824  
1.809  
1.731  
1.714  
1.697  
1.680  
1.665  
1.588  
1.572  
1.555  
1.257  
1.165  
1.150  
1.026  
1.013

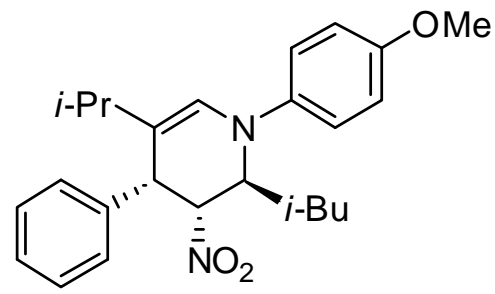

5.14

4.07

1.02

1.00

0.99

3.05

0.98

1.01

0.96

1.01

1.04

12.23

5.0  
4.0  
3.0  
2.0  
1.0  
0.0

9.0  
8.0  
7.0  
6.0  
5.0  
4.0  
3.0  
2.0  
1.0  
0.0  
ppm (t1)

154.323  
140.974  
136.516  
129.448  
128.468  
127.612  
124.777  
118.648  
116.579  
114.575

87.700  
77.318  
77.213  
77.000  
76.683

56.433  
55.578

41.787  
40.870

28.766  
24.464  
23.305  
22.507  
19.953

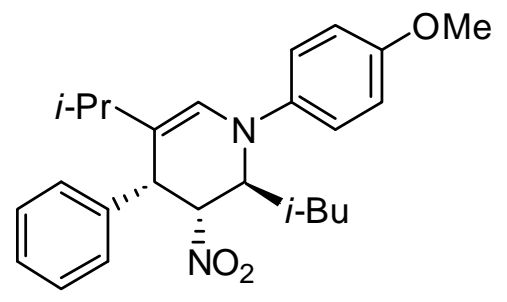

**5j**

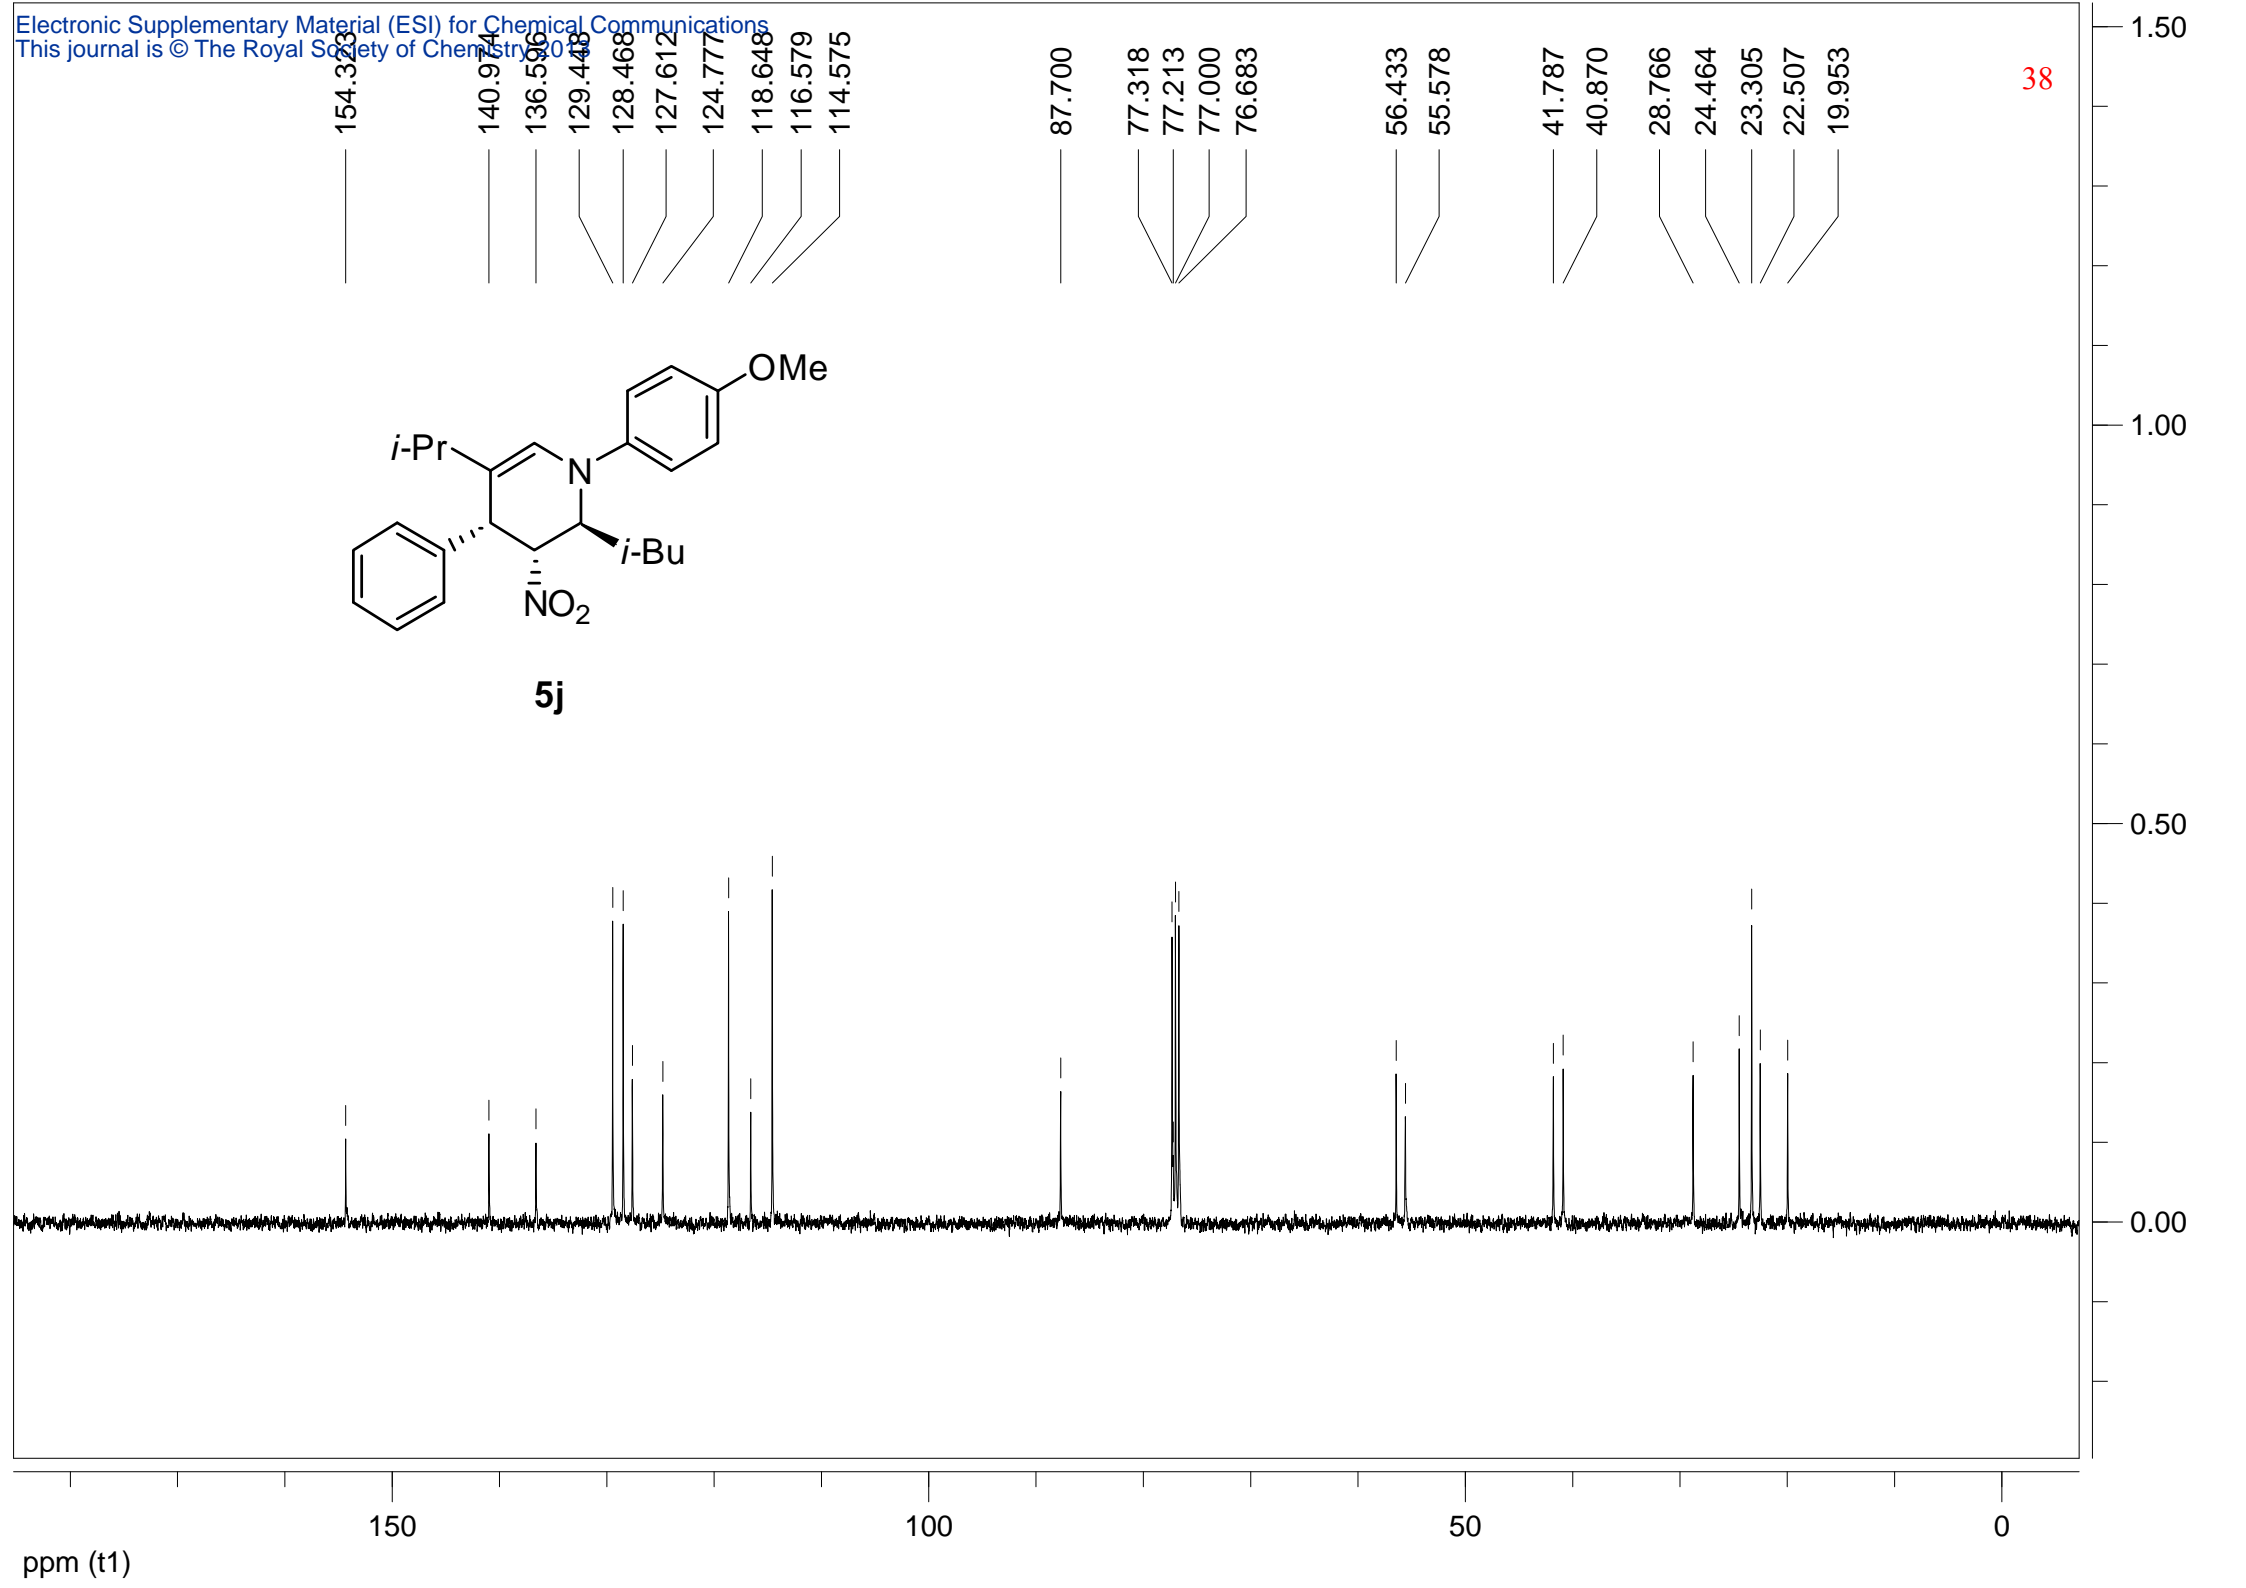



7.278  
7.263  
7.244  
7.187  
7.169  
7.103  
7.089  
7.065  
7.048  
6.915  
6.840  
6.820  
6.578

4.967

4.178  
3.753  
3.474  
3.460  
3.384  
3.348  
3.219  
3.183  
2.739  
2.721  
1.937  
1.920  
1.902  
1.883  
1.865  
1.847  
1.831

39

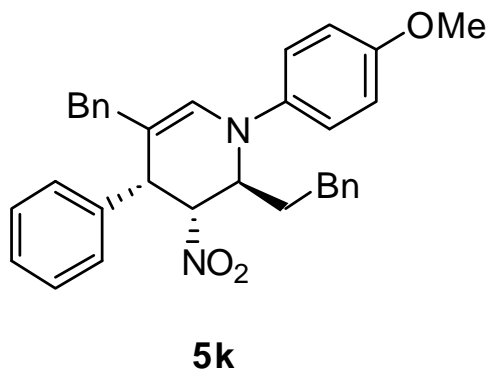

13.45  
6.06  
6.99

1.00

0.98

3.03

0.96  
1.02

0.96

1.98

1.97

9.0  
ppm (t1)

8.0

7.0

6.0

5.0

4.0

3.0

2.0

1.0

0.0

5.0

4.0

3.0

2.0

1.0

0.0

154.764  
140.677  
140.207  
140.007  
135.535  
129.589  
128.591  
128.499  
128.447  
128.240  
127.741  
126.271  
126.109  
119.328  
114.592  
110.910

87.147

77.318

77.000

76.683

57.303

55.574

41.560

39.098

33.574

31.769

40

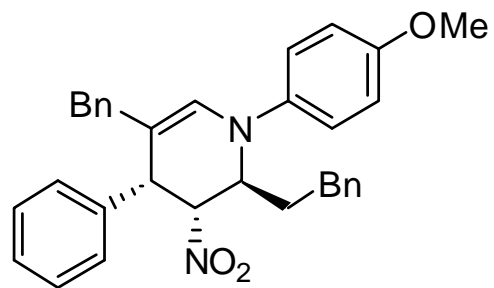

**5k**

ppm (t1)

150

100

50

0

2.50

2.00

1.50

1.00

0.50

0.00

7.329  
7.311  
7.286  
7.260  
7.241  
6.991  
6.970  
6.883  
6.862  
6.399

5.069  
5.015

4.164  
4.155  
3.860  
3.846  
3.794

2.050  
2.033  
2.012  
1.994  
1.978  
1.779  
1.761  
1.743  
1.725  
1.707  
1.689  
1.672  
1.653  
1.638  
1.513  
1.300  
1.220  
0.918  
0.895  
0.876  
0.859

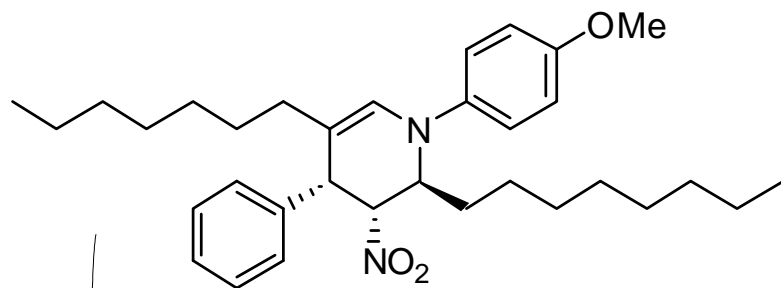

51

5.16

2.11  
1.98

1.00

1.00

1.00

4.12

1.99

2.04

2.01

20.21

6.12

ppm (t1)

5.0

0.0

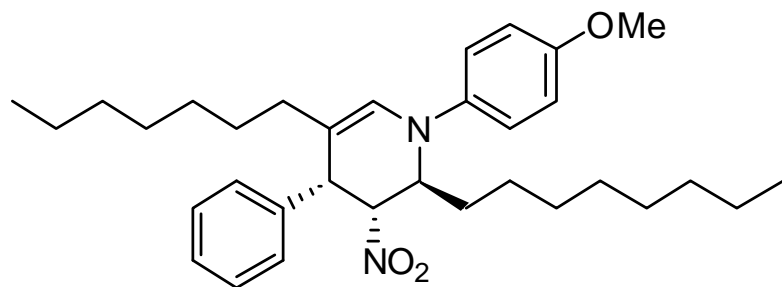

5I

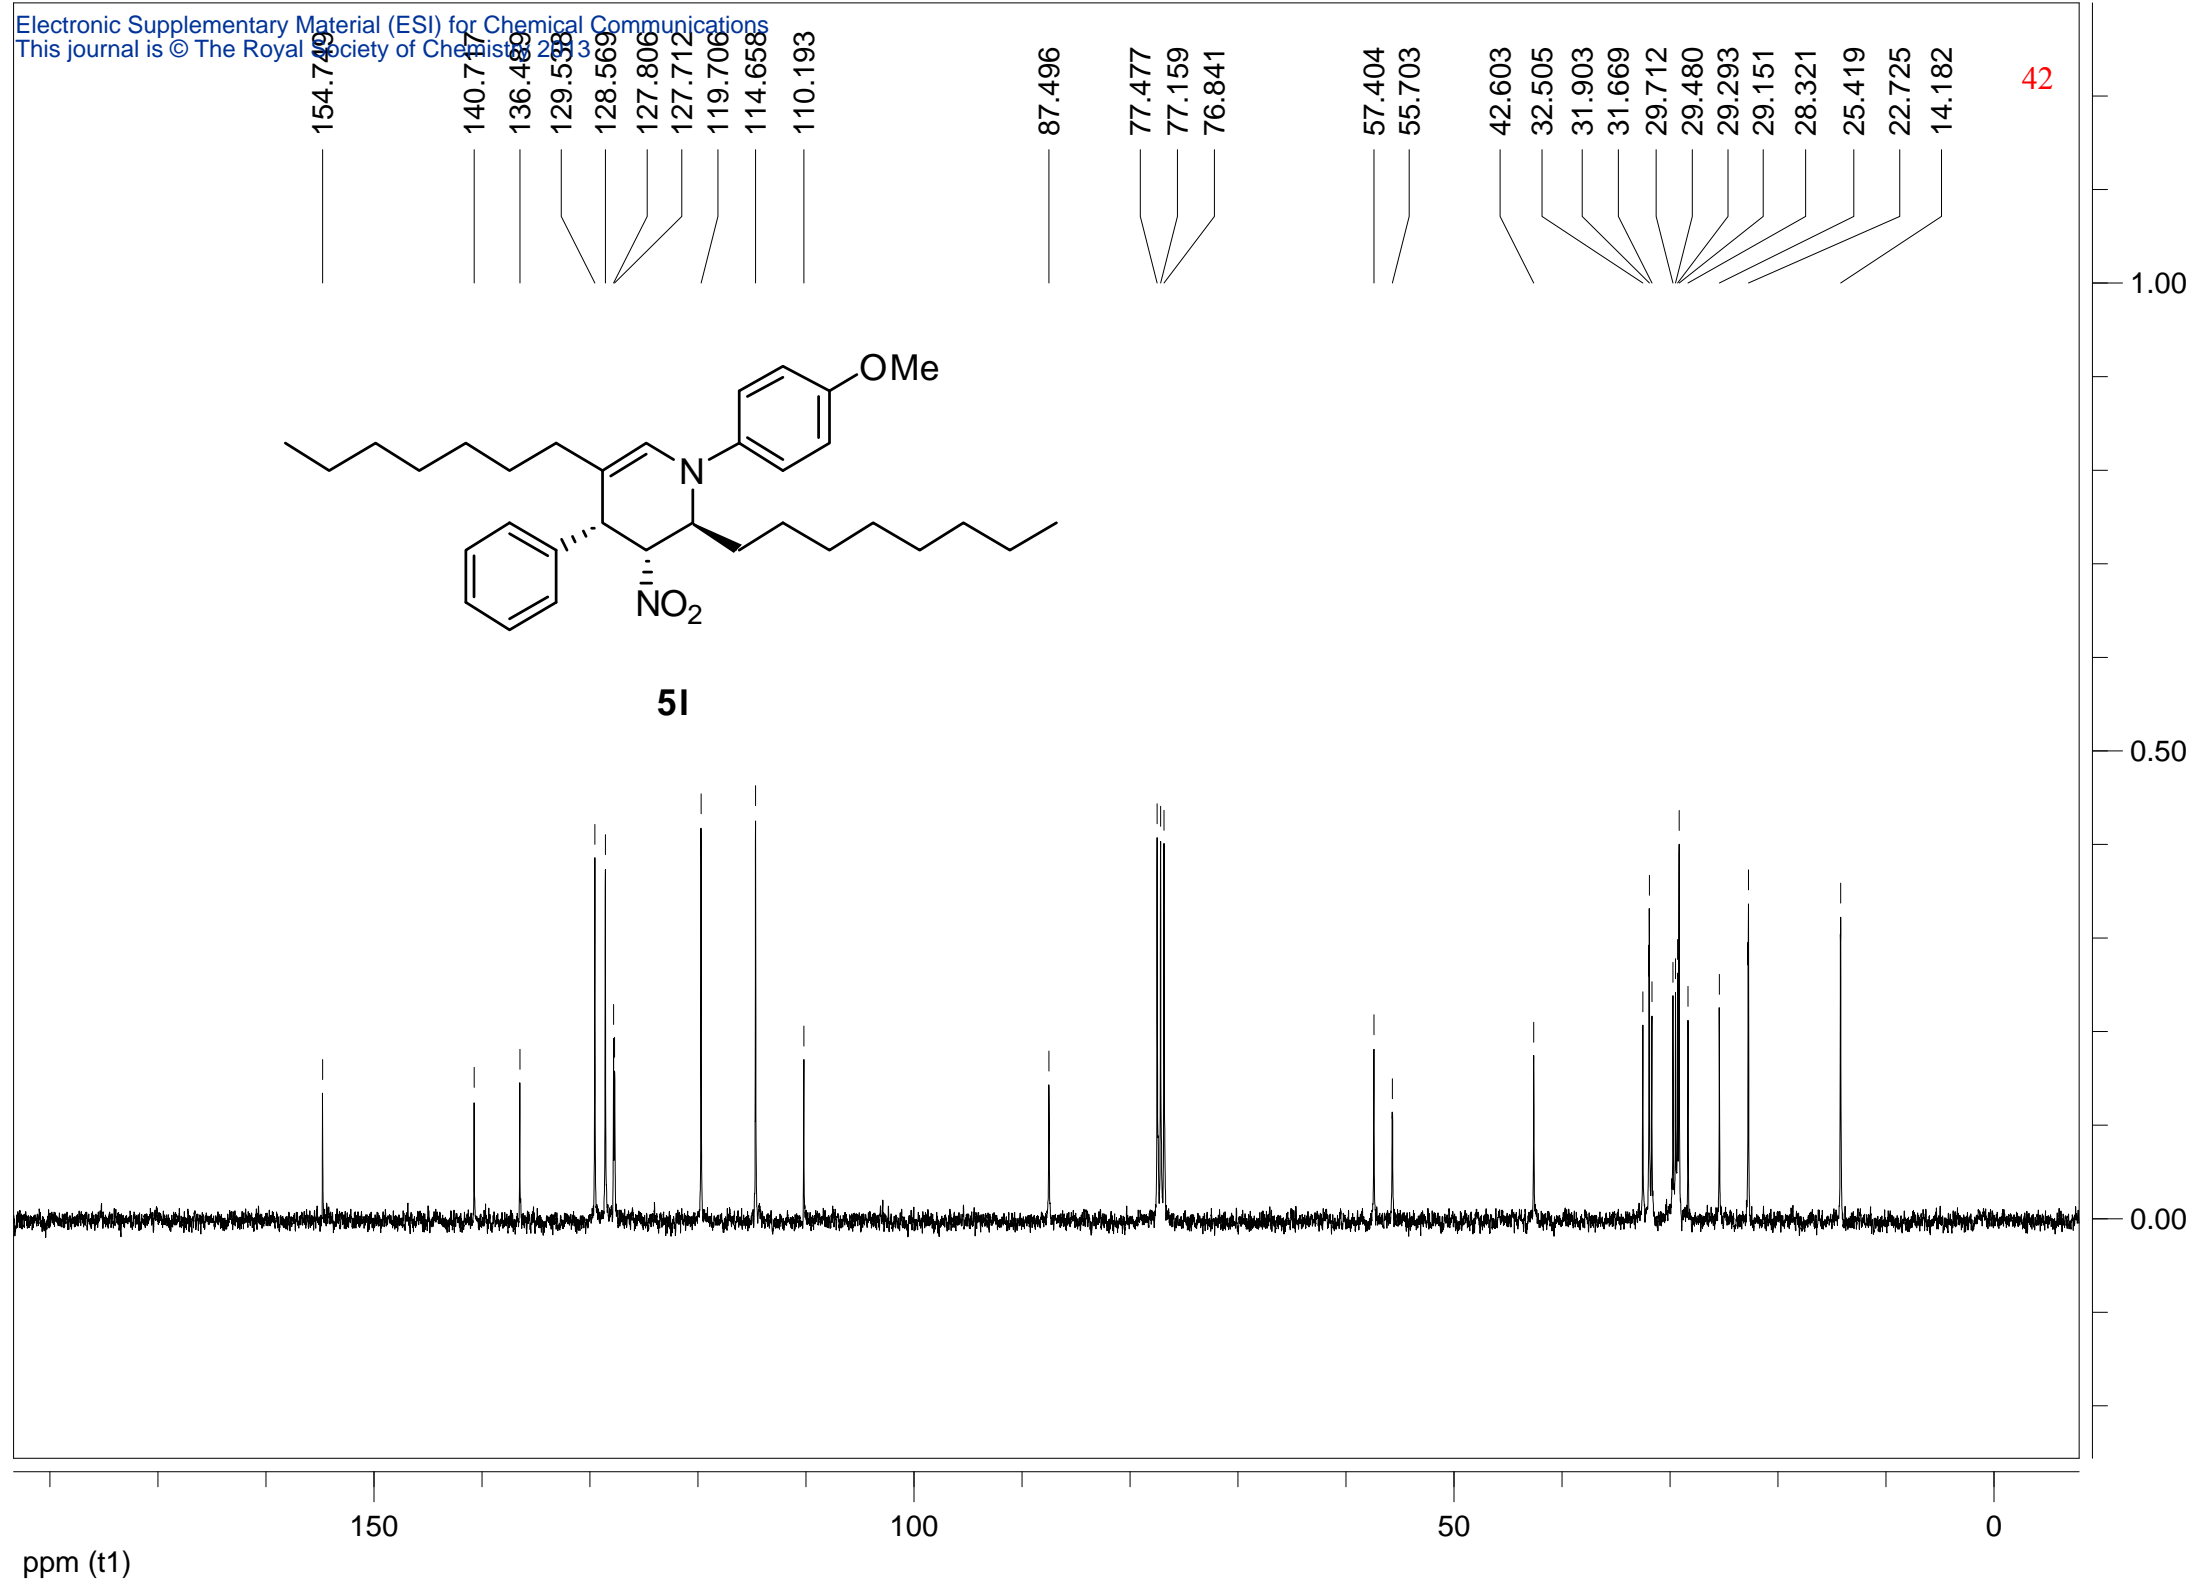

7.304  
7.242  
7.225  
7.206  
7.188  
7.172  
7.158  
6.999  
6.979  
6.926  
6.910  
6.868  
6.848  
6.524

4.977

4.046  
3.779  
3.538  
3.525  
3.370  
3.334  
3.224  
3.188

1.684  
1.668  
1.650  
1.633  
1.612  
1.593  
1.575  
1.557  
1.033  
1.016  
0.999

0.000

43

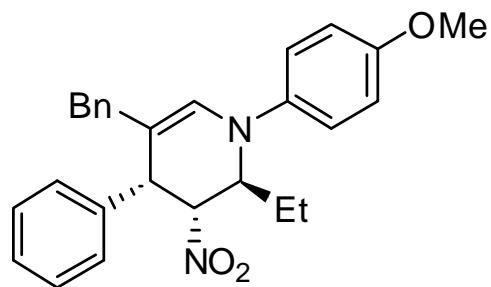

5m

8.03

5.99

0.97

1.00

1.02

3.05

1.00

0.97

1.01

2.09

2.96

9.0  
ppm (f1)

8.0

7.0

6.0

5.0

4.0

3.0

2.0

1.0

0.0

-1.0

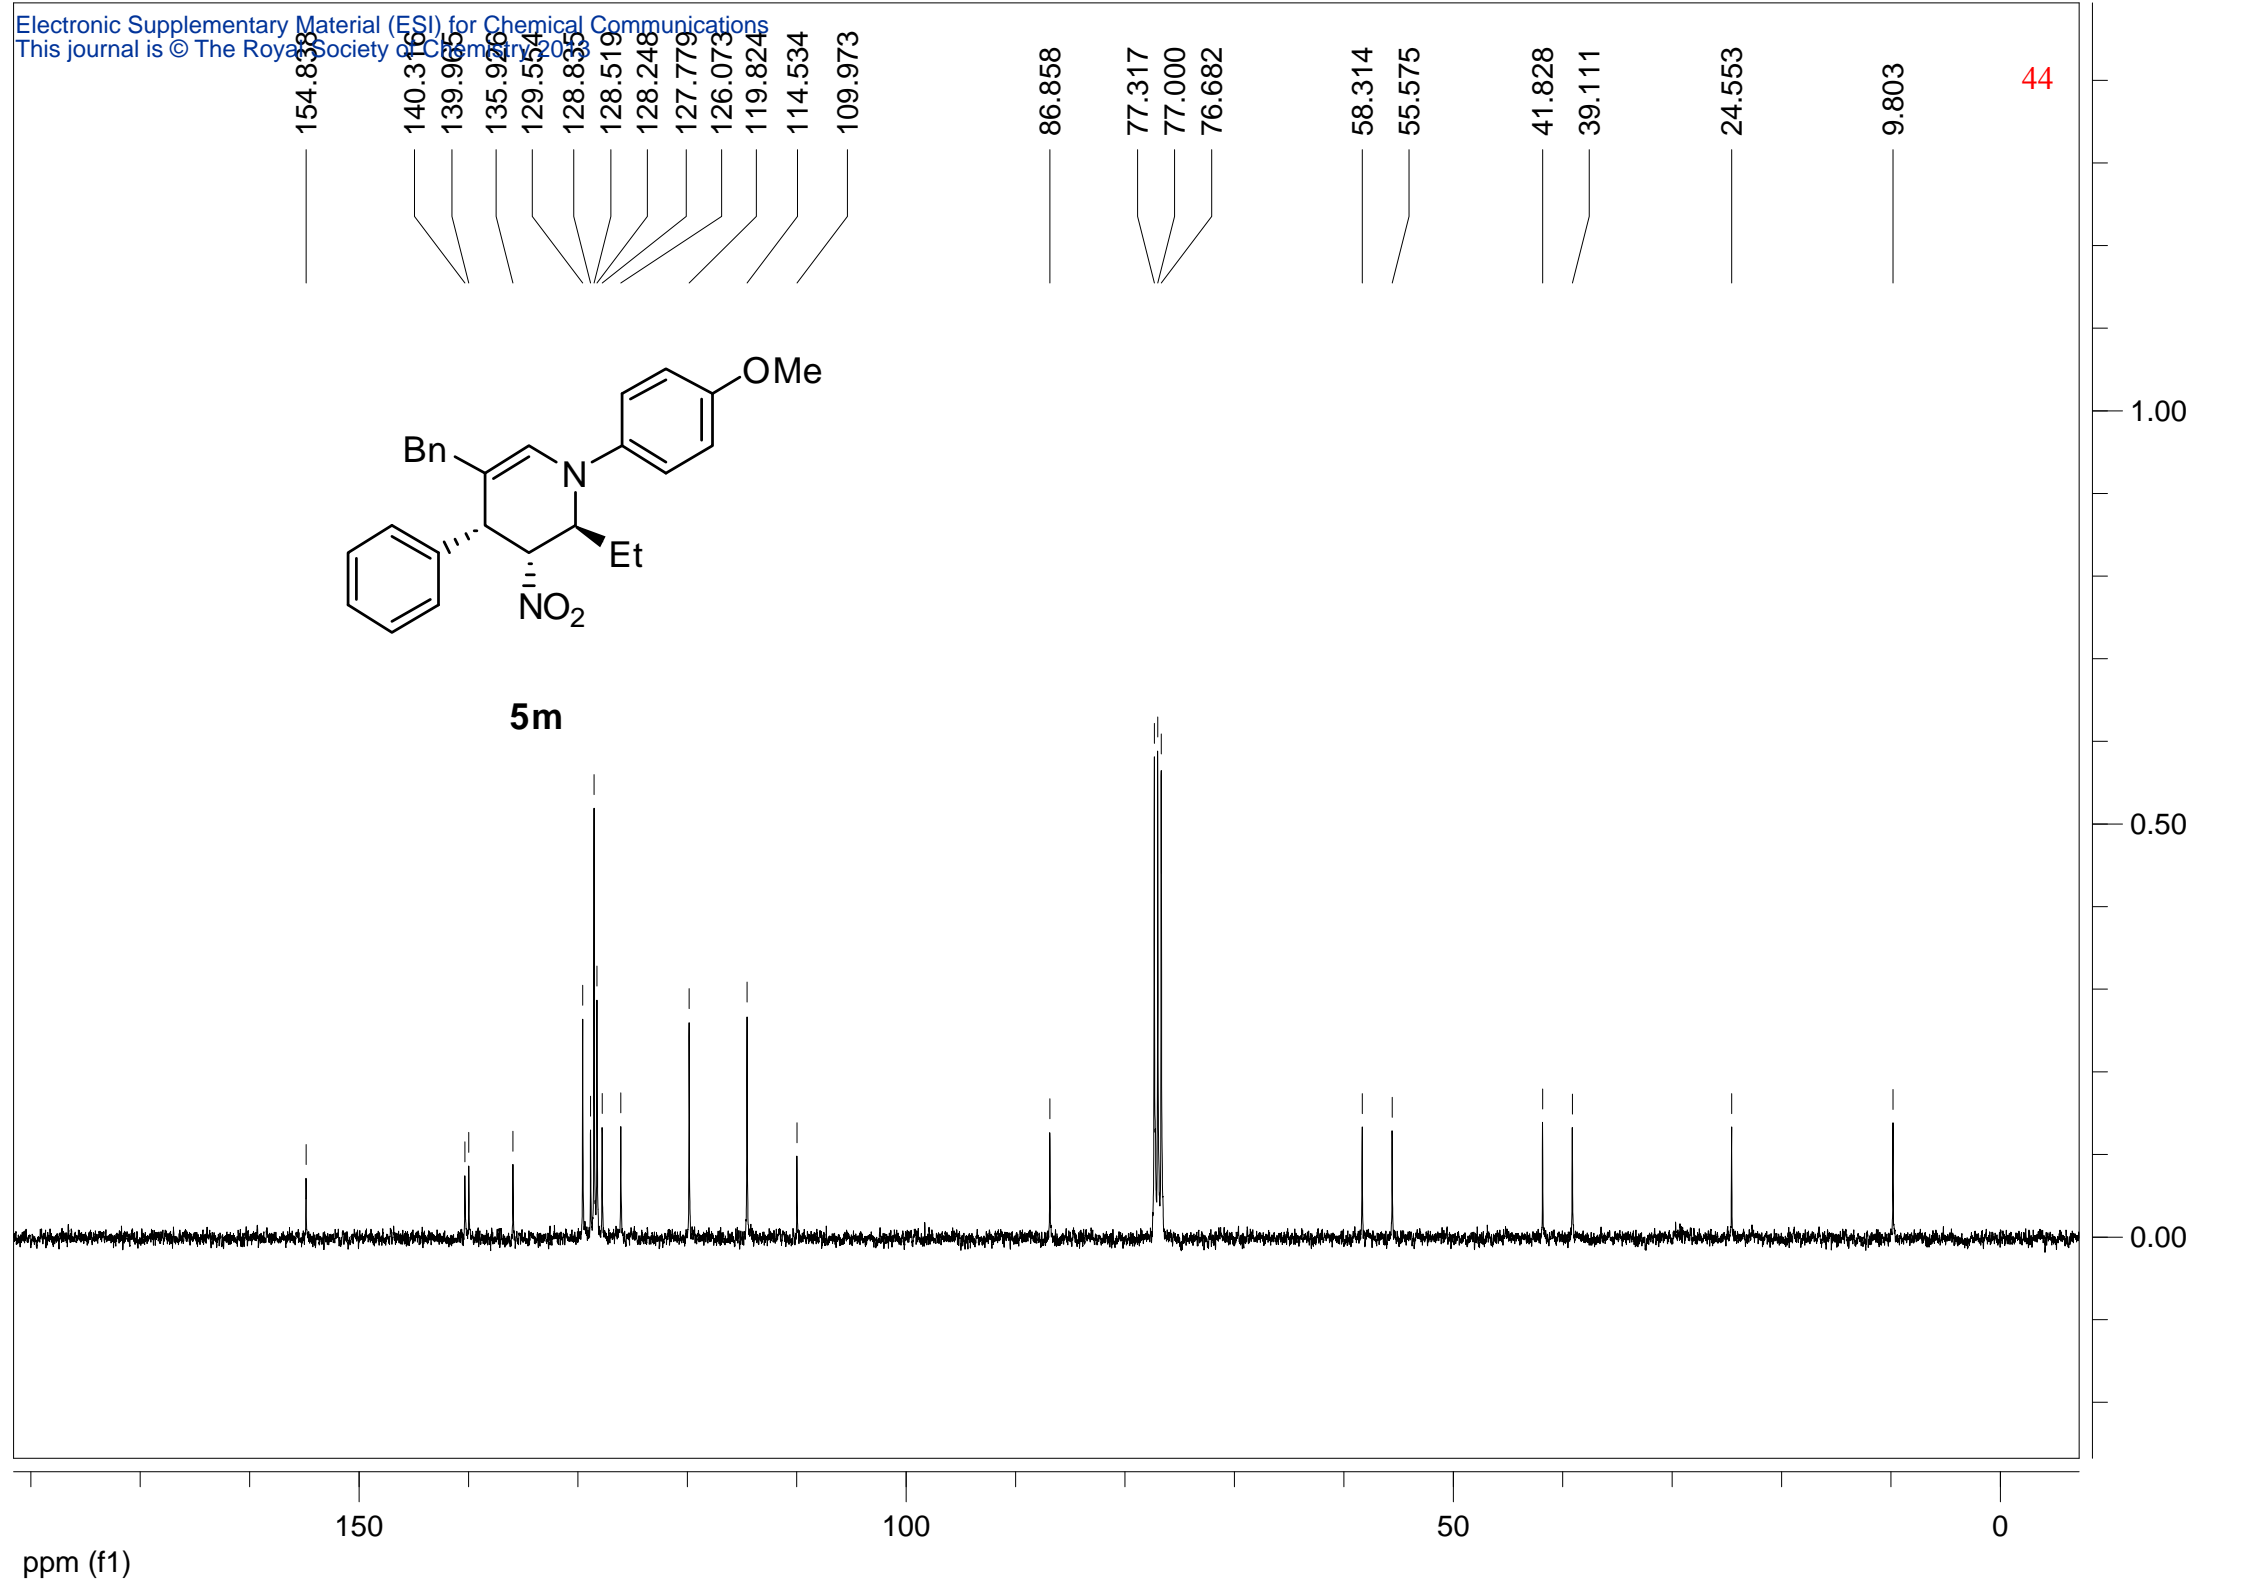

7.299  
7.282  
7.230  
6.962  
6.942  
6.850  
6.830  
6.375

5.035

4.135

3.812

3.762

2.060

2.042

1.950

1.878

1.726

1.610

1.530

1.515

1.353

1.225

0.984

0.968

0.952

0.824

0.807

0.791

45

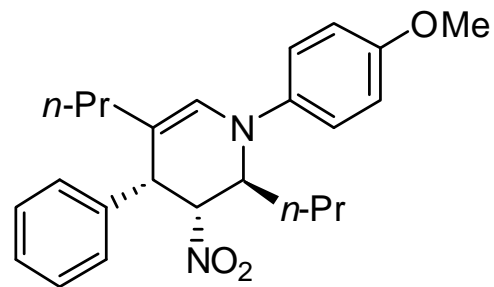

5.06

2.03

1.96

0.99

1.00

0.99

0.99

1.00

2.05

2.01

2.09

3.03

2.99

-1.0

0.0

1.0

2.0

3.0

4.0

5.0

6.0

8.0

7.0

6.0

5.0

4.0

3.0

2.0

1.0

0.0

ppm (f1)

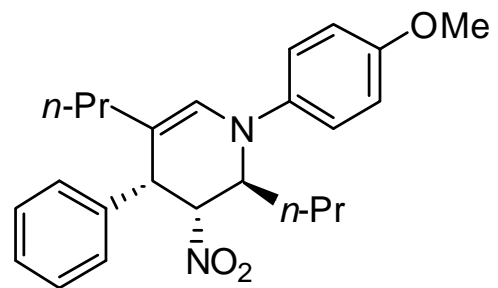

5n

154.538  
140.542  
136.285  
129.338  
128.416  
127.646  
127.597  
119.462  
114.468  
109.724

87.291

77.319

77.000

76.682

57.139

55.527

42.288

34.485

33.757

21.283

18.693

14.105

13.554

46

2.50

2.00

1.50

1.00

0.50

0.00

-0.50

ppm (f1)

150

100

50

0



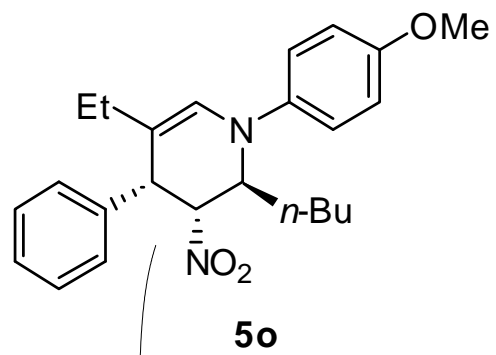

7.303  
7.285  
7.232  
7.217  
6.968  
6.949  
6.856  
6.837  
6.366

5.058

4.125  
3.872  
3.860  
3.768

2.070  
2.052  
2.033  
2.009  
1.990  
1.973  
1.719  
1.700  
1.681  
1.663  
1.462  
1.445  
1.350  
1.333  
0.930  
0.913  
0.000

47

5.05

2.05  
1.95

0.99

1.00

0.99  
3.04  
0.97

1.96

2.09

4.17

5.97

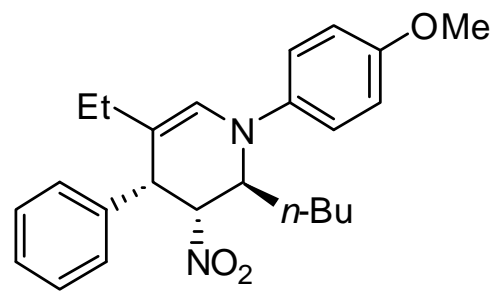

**5o**

154.609  
140.516  
136.350  
129.337  
128.423  
127.672  
126.925  
119.709  
114.468  
111.686

87.322

77.317  
77.000  
76.681

56.977  
55.531

42.500

30.982  
27.346  
25.459  
22.654

13.916  
13.195

48

ppm (f1)

150

100

50

0

2.50  
2.00  
1.50  
1.00  
0.50  
0.00

7.334  
7.329  
7.312  
7.259  
6.977  
6.954  
6.828  
6.822  
6.729  
6.723  
6.712  
5.817  
4.765  
4.646  
4.633  
4.624  
4.612  
4.551  
4.542  
4.532  
4.523  
4.510  
4.501  
3.843  
3.795  
3.783

1.645  
1.554  
1.545  
1.490  
1.478  
1.460  
1.423  
1.405  
1.258  
0.598  
0.579  
0.560  
0.073  
0.004

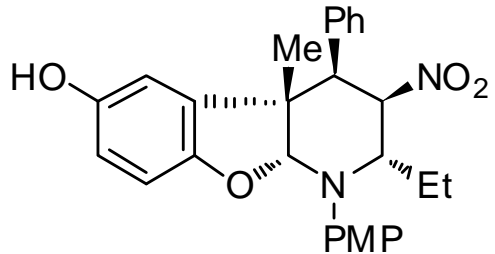

6.98  
2.04  
2.10  
1.01  
1.00  
0.93  
1.06  
1.05  
3.09  
2.09  
3.16  
3.14

6000  
5000  
4000  
3000  
2000  
1000  
0

5.0

0.0

ppm (t1)

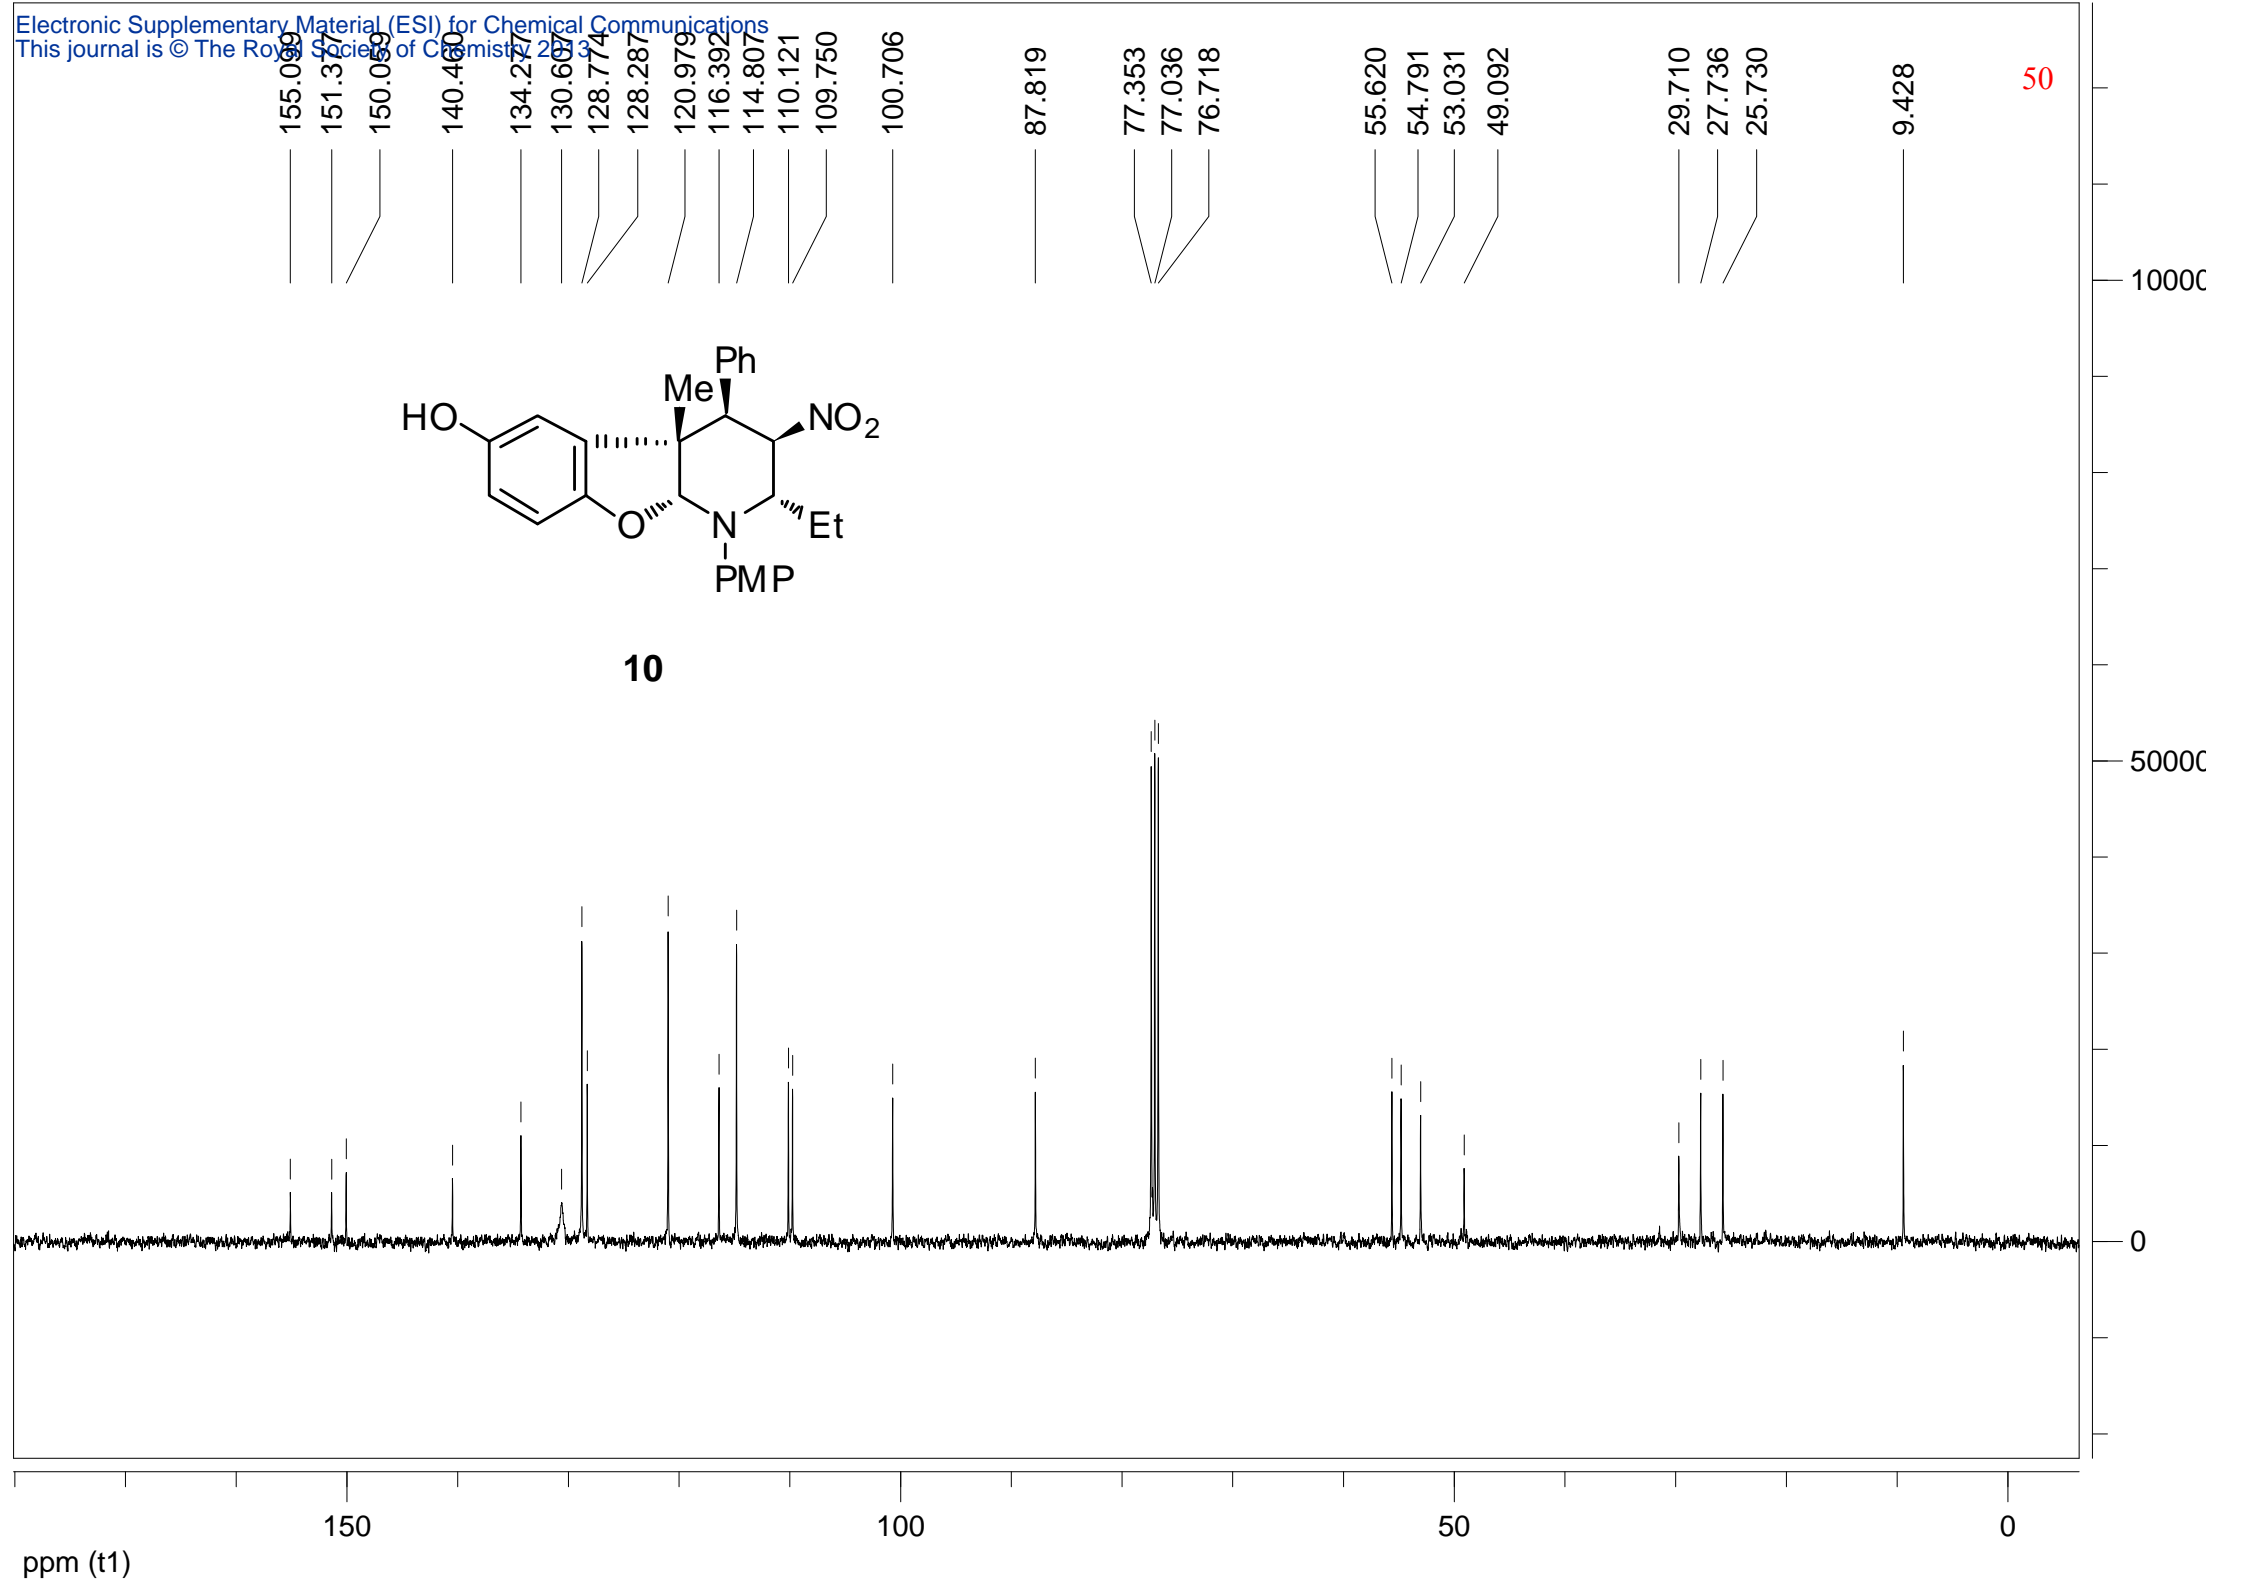

Supplement: c3cc40690c.pdf [file c3cc40690c.pdf]
